# Supplementary material
Source: Research Square preprint supplement (doi:10.21203/rs.3.rs-8924973/v1)
Supplement: Supplementary file 1 [file 9e1d56e43f12ae2eadb05c2c.xlsx]

## Sheet: TEAM ONE
Food Name	Quantity (g)	Quantity Per Person (g)	Measure	Energy (kcal)	Calories Per Person per Day (Kcals)	Calories Per Person per Service (Kcals)	Carbohydrate (g)	Carbohydrate Per Person Per Day (g)	Carbohydrate Per Person Per Service (g)	Protein (g)	Protein Per Person Per Day (g)	Protein Per Person Per Service (g)	Fat (g)	Fat Per Person Per Day (g)	Fat Per Person Per Service (g)	Foodprint CO2 (kg.CO2.eq)	Foodprint CO2 Per Person Per Day (kg.CO2.eq)	Foodprint CO2 Per Person Per Service (kg.CO2.eq)	Foodprint Water (L)	Foodprint Water (kL.eq)	Foodprint Water Per Person Per Day (L)	Foodprint Water Per Person Per Day (kL.eq)	Foodprint Water Per Person Per Service (kL.eq)
Beef (Beef Herd)
Beef, lean, average, raw	15000	25	64 x Large	19305	32.175	16.0875	0	0	0	3375	5.625	2.8125	645	1.075	0.5375	399	0.665	0.3325	396975	396.975	661.625	0.661625	0.330813
Beef, mince, raw, extra lean	6000	10	25 x Extra large	7524	12.54	6.27	0	0	0	1314	2.19	1.095	252	0.42	0.21	127	0.211667	0.105833	158790	158.79	264.65	0.26465	0.132325
Beef, fillet steak, raw, lean	3450	5.75	20 x average 8oz	4820	8.03333	4.01667	0	0	0	731	1.21833	0.609167	210	0.35	0.175	73	0.121667	0.0608333	91304	91.304	152.173	0.152173	0.0760867
Beef, sirloin steak, raw, lean	3450	5.75	15 x Large	4640	7.73333	3.86667	0	0	0	811	1.35167	0.675833	155	0.258333	0.129167	73	0.121667	0.0608333	91304	91.304	152.173	0.152173	0.0760867
	27900	46.5	Meal Totals	36289	60.4817	30.2408	0	0	0	6231	10.385	5.1925	1263	2.105	1.0525	672	1.12	0.56	738374	738.374	1230.62	1.23062	0.615312
Lamb & Mutton
			Meal Totals	0	0	0	0	0	0	0	0	0	0	0	0	0	0	0	0	0	0	0	0
Beef (Dairy Herd)
			Meal Totals	0	0	0	0	0	0	0	0	0	0	0	0	0	0	0	0	0	0	0	0
Crustaceans (Farmed)
Prawns, king, raw	2000	3.33333	14 x Medium Portion (1 Cup)	1534	2.55667	1.27833	0	0	0	352	0.586667	0.293333	14	0.0233333	0.0116667	15.6	0.026	0.013	3476	3.476	5.79333	0.00579333	0.00289667
			Meal Totals	1534	2.55667	1.27833	0	0	0	352	0.586667	0.293333	14	0.0233333	0.0116667	15.6	0.026	0.013	3476	3.476	5.79333	0.00579333	0.00289667
Cheese
Cheese, Parmesan, fresh	4000	6.66667	267 x tablespoon	16622	27.7033	13.8517	34.4	0.0573333	0.0286667	1448	2.41333	1.20667	1188	1.98	0.99	61	0.101667	0.0508333	40800	40.8	68	0.068	0.034
Cheese, Cheddar, English	6000	10	150 x Average Portion	24966	41.61	20.805	6	0.01	0.005	1524	2.54	1.27	2094	3.49	1.745	53	0.0883333	0.0441667	30360	30.36	50.6	0.0506	0.0253
Cheese, Feta	400	0.666667	65 x 1cm cubes	1000	1.66667	0.833333	5.7	0.0095	0.00475	62	0.103333	0.0516667	81	0.135	0.0675	3.3	0.0055	0.00275	3764	3.764	6.27333	0.00627333	0.00313667
Cheese, Halloumi	675	1.125	4 ¾ x x	2117	3.52833	1.76417	11	0.0183333	0.00916667	161	0.268333	0.134167	159	0.265	0.1325	10.1	0.0168333	0.00841667	6352	6.352	10.5867	0.0105867	0.00529333
			Meal Totals	44704	74.5067	37.2533	57	0.095	0.0475	3196	5.32667	2.66333	3521	5.86833	2.93417	128	0.213333	0.106667	81276	81.276	135.46	0.13546	0.06773
Pig Meat
Ham	1000	1.66667	25 x Average Portion	1073	1.78833	0.894167	10	0.0166667	0.00833333	184	0.306667	0.153333	33	0.055	0.0275	5.1	0.0085	0.00425	6116	6.116	10.1933	0.0101933	0.00509667
			Meal Totals	1073	1.78833	0.894167	10	0.0166667	0.00833333	184	0.306667	0.153333	33	0.055	0.0275	5.1	0.0085	0.00425	6116	6.116	10.1933	0.0101933	0.00509667
Fish (Farmed)
Broth, fish, homemade	100	0.166667	0.4 x 1 cup	15	0.025	0.0125	0.4	0.000666667	0.000333333	2	0.00333333	0.00166667	0.6	0.001	0.0005	0.6903	0.0011505	0.00057525	0	0	0	0	0
Red snapper, flesh only, raw	4000	6.66667	20 x average, whole	3604	6.00667	3.00333	0	0	0	784	1.30667	0.653333	52	0.0866667	0.0433333	17	0.0283333	0.0141667	7896	7.896	13.16	0.01316	0.00658
Tuna, canned in brine, drained	2000	3.33333	15 x Standard can (180g) drained	2172	3.62	1.81	0	0	0	498	0.83	0.415	20	0.0333333	0.0166667	4.2	0.007	0.0035	0	0	0	0	0
Salmon, farmed, flesh only, raw	6000	10	33 x large fillet	12996	21.66	10.83	0	0	0	1224	2.04	1.02	900	1.5	0.75	20.8	0.0346667	0.0173333	13158	13.158	21.93	0.02193	0.010965
Salmon, smoked (cold-smoked)	2000	3.33333	36 x average portion	3682	6.13667	3.06833	10	0.0166667	0.00833333	456	0.76	0.38	202	0.336667	0.168333	6.9	0.0115	0.00575	4386	4.386	7.31	0.00731	0.003655
Cod, flesh only, raw	6000	10	34 x Large	4524	7.54	3.77	0	0	0	1050	1.75	0.875	36	0.06	0.03	12.8	0.0213333	0.0106667	16692	16.692	27.82	0.02782	0.01391
Sea Bass or bream, raw	6000	10	38 x fillet	5503	9.17167	4.58583	0	0	0	1106	1.84333	0.921667	120	0.2	0.1	19.6	0.0326667	0.0163333	39144	39.144	65.24	0.06524	0.03262
			Meal Totals	32496	54.16	27.08	10.4	0.0173333	0.00866667	5120	8.53333	4.26667	1331	2.21833	1.10917	82	0.136667	0.0683333	81276	81.276	135.46	0.13546	0.06773
Poultry Meat
Bone broth or stock, chicken, homemade, bones removed	200	0.333333	0.8 x 1 cup	32.7	0.0545	0.02725	0	0	0	4.5	0.0075	0.00375	1.6	0.00266667	0.00133333	0.0042	7e-06	3.5e-06	0	0	0	0	0
Chicken, light meat, raw	52000	86.6667	297 x cup, diced	55068	91.78	45.89	0	0	0	12480	20.8	10.4	572	0.953333	0.476667	135	0.225	0.1125	173170	173.17	288.617	0.288617	0.144308
Chicken, wing quarter, raw, meat and skin, weighed with bone	20000	33.3333	136 x Average wing quarter	25480	42.4667	21.2333	0	0	0	2680	4.46667	2.23333	1640	2.73333	1.36667	52	0.0866667	0.0433333	66604	66.604	111.007	0.111007	0.0555033
Duck, roasted, meat only	3000	5	6 ¾ x duck	5844	9.74	4.87	0	0	0	759	1.265	0.6325	312	0.52	0.26	12.3	0.0205	0.01025	12975	12.975	21.625	0.021625	0.0108125
Turkey, light meat, raw	5000	8.33333	2 x large breast & 9 x average serve breast	5240	8.73333	4.36667	0	0	0	1220	2.03333	1.01667	40	0.0666667	0.0333333	20.4	0.034	0.017	21625	21.625	36.0417	0.0360417	0.0180208
			Meal Totals	91665	152.775	76.3875	0	0	0	17144	28.5733	14.2867	2566	4.27667	2.13833	220	0.366667	0.183333	274374	274.374	457.29	0.45729	0.228645
Eggs
Eggs, chicken, white, raw	16000	26.6667	66 x cup	6912	11.52	5.76	0	0	0	1728	2.88	1.44	0	0	0	55	0.0916667	0.0458333	58112	58.112	96.8533	0.0968533	0.0484267
Eggs, chicken, yolk, raw	8000	13.3333	0.73 x 611 Average yolk	27784	46.3067	23.1533	0	0	0	1312	2.18667	1.09333	2504	4.17333	2.08667	27.7	0.0461667	0.0230833	29056	29.056	48.4267	0.0484267	0.0242133
Eggs, chicken, whole, raw	41000	68.3333	612 x Jumbo, Size 1	53874	89.79	44.895	0	0	0	5166	8.61	4.305	3690	6.15	3.075	142	0.236667	0.118333	148912	148.912	248.187	0.248187	0.124093
			Meal Totals	88570	147.617	73.8083	0	0	0	8206	13.6767	6.83833	6194	10.3233	5.16167	225	0.375	0.1875	236080	236.08	393.467	0.393467	0.196733
Tofu
Tofu, raw, regular	900	1.5	3 x cup	750	1.25	0.625	18	0.03	0.015	73	0.121667	0.0608333	43	0.0716667	0.0358333	2	0.00333333	0.00166667	2271	2.271	3.785	0.003785	0.0018925
			Meal Totals	750	1.25	0.625	18	0.03	0.015	73	0.121667	0.0608333	43	0.0716667	0.0358333	2	0.00333333	0.00166667	2271	2.271	3.785	0.003785	0.0018925
Groundnuts
Peanut butter, smooth	8000	13.3333	320 x Thick spread on slice	48496	80.8267	40.4133	976	1.62667	0.813333	1824	3.04	1.52	4144	6.90667	3.45333	6.6	0.011	0.0055	27024	27.024	45.04	0.04504	0.02252
			Meal Totals	48496	80.8267	40.4133	976	1.62667	0.813333	1824	3.04	1.52	4144	6.90667	3.45333	6.6	0.011	0.0055	27024	27.024	45.04	0.04504	0.02252
Other Pulses
Asda Mixed Bean Salad in Water 290g	2000	3.33333	20 x (hob-heated and drained) Per 1/2 can	1480	2.46667	1.23333	240	0.4	0.2	100	0.166667	0.0833333	14	0.0233333	0.0116667	1	0.00166667	0.000833333	4036	4.036	6.72667	0.00672667	0.00336333
Lentils, red, split, dried, raw	1000	1.66667	5 ¼ x cup	3050	5.08333	2.54167	466	0.776667	0.388333	256	0.426667	0.213333	18	0.03	0.015	1	0.00166667	0.000833333	5874	5.874	9.79	0.00979	0.004895
Baked beans, canned in tomato sauce	10000	16.6667	24 x large can	8014	13.3567	6.67833	1391	2.31833	1.15917	500	0.833333	0.416667	50	0.0833333	0.0416667	14.5	0.0241667	0.0120833	8010	8.01	13.35	0.01335	0.006675
			Meal Totals	12544	20.9067	10.4533	2097	3.495	1.7475	856	1.42667	0.713333	82	0.136667	0.0683333	16.5	0.0275	0.01375	17920	17.92	29.8667	0.0298667	0.0149333
Peas
Peas, frozen, raw	6000	10	75 x NHS serving = 3 tablespoons	4067	6.77833	3.38917	604	1.00667	0.503333	318	0.53	0.265	42	0.07	0.035	15.3	0.0255	0.01275	11874	11.874	19.79	0.01979	0.009895
Peas, sugar-snap, raw	6000	10	60 x NHS serving = handful (14 beans)	2086	3.47667	1.73833	290	0.483333	0.241667	204	0.34	0.17	12	0.02	0.01	15.3	0.0255	0.01275	11874	11.874	19.79	0.01979	0.009895
			Meal Totals	6152	10.2533	5.12667	895	1.49167	0.745833	522	0.87	0.435	54	0.09	0.045	30.6	0.051	0.0255	23748	23.748	39.58	0.03958	0.01979
Nuts
			Meal Totals	0	0	0	0	0	0	0	0	0	0	0	0	0	0	0	0	0	0	0	0
Grains
Garofalo Mafalde Dry Pasta 500g	3000	5	6 x Per pack	10350	17.25	8.625	2100	3.5	1.75	420	0.7	0.35	30	0.05	0.025	3	0.005	0.0025	3984	3.984	6.64	0.00664	0.00332
Pasta, white, dried, raw	13000	21.6667	137 x cup	43576	72.6267	36.3133	8957	14.9283	7.46417	1469	2.44833	1.22417	208	0.346667	0.173333	13.2	0.022	0.011	17264	17.264	28.7733	0.0287733	0.0143867
Pasta, wholewheat, spaghetti, dried, raw	8000	13.3333	73 x Large portion	25806	43.01	21.505	4994	8.32333	4.16167	1008	1.68	0.84	200	0.333333	0.166667	8.1	0.0135	0.00675	10624	10.624	17.7067	0.0177067	0.00885333
Flour mix, gluten free	5000	8.33333	54 x cup	17945	29.9083	14.9542	4230	7.05	3.525	200	0.333333	0.166667	25	0.0416667	0.0208333	5.9	0.00983333	0.00491667	9245	9.245	15.4083	0.0154083	0.00770417
Flour, wheat, wholemeal	5000	8.33333	36 x cup	15946	26.5767	13.2883	3182	5.30333	2.65167	580	0.966667	0.483333	100	0.166667	0.0833333	5.9	0.00983333	0.00491667	9245	9.245	15.4083	0.0154083	0.00770417
			Meal Totals	113623	189.372	94.6858	23462	39.1033	19.5517	3677	6.12833	3.06417	563	0.938333	0.469167	36.1	0.0601667	0.0300833	50362	50.362	83.9367	0.0839367	0.0419683
Milk
Butter, unsalted	1500	2.5	5 x cup, cubed	11167	18.6117	9.30583	8.6	0.0143333	0.00716667	9	0.015	0.0075	1233	2.055	1.0275	13.5	0.0225	0.01125	8330	8.33	13.8833	0.0138833	0.00694167
Yogurt, Greek, plain, whole	20000	33.3333	133 x Larger pot	23480	39.1333	19.5667	760	1.26667	0.633333	1960	3.26667	1.63333	1400	2.33333	1.16667	40	0.0666667	0.0333333	33180	33.18	55.3	0.0553	0.02765
Milk, semi-skimmed, pasteurised, average	98900	164.833	396 x cup / serving	46701	77.835	38.9175	4431	7.385	3.6925	3462	5.77	2.885	1681	2.80167	1.40083	151	0.251667	0.125833	158141	158.141	263.568	0.263568	0.131784
			Meal Totals	81348	135.58	67.79	5199	8.665	4.3325	5431	9.05167	4.52583	4314	7.19	3.595	205	0.341667	0.170833	199651	199.651	332.752	0.332752	0.166376
Soymilk
Milk, soya, non-dairy alternative to milk, unsweetened, fortified	792	1.32	5 x Added to instant hot drinks	205	0.341667	0.170833	3.6	0.006	0.003	19	0.0316667	0.0158333	12.7	0.0211667	0.0105833	0.697	0.00116167	0.000580833	2980	2.98	4.96667	0.00496667	0.00248333
			Meal Totals	205	0.341667	0.170833	3.6	0.006	0.003	19	0.0316667	0.0158333	12.7	0.0211667	0.0105833	0.697	0.00116167	0.000580833	2980	2.98	4.96667	0.00496667	0.00248333
Other Milk
Alpro Coconut Original	824	1.37333	6 x On cereal (30-35g portion)	156	0.26	0.13	21.4	0.0356667	0.0178333	0.824	0.00137333	0.000686667	7.4	0.0123333	0.00616667	0.3378	0.000563	0.0002815	3101	3.101	5.16833	0.00516833	0.00258417
Almond Milk, unsweetened	500	0.833333	2 x cup / serving	204	0.34	0.17	2.5	0.00416667	0.00208333	7.3	0.0121667	0.00608333	18.4	0.0306667	0.0153333	0.495	0.000825	0.0004125	1882	1.882	3.13667	0.00313667	0.00156833
Oat Milk, unsweetened, with calcium	495	0.825	2 x cup / serving	212	0.353333	0.176667	31.2	0.052	0.026	5.1	0.0085	0.00425	7.4	0.0123333	0.00616667	0.4901	0.000816833	0.000408417	1863	1.863	3.105	0.003105	0.0015525
			Meal Totals	572	0.953333	0.476667	55	0.0916667	0.0458333	13.2	0.022	0.011	33.2	0.0553333	0.0276667	1.3	0.00216667	0.00108333	6845	6.845	11.4083	0.0114083	0.00570417
Cassava
			Meal Totals	0	0	0	0	0	0	0	0	0	0	0	0	0	0	0	0	0	0	0	0
Rice (Flooded)
Brown rice, basmati, dry	8000	13.3333	0 x cup	26646	44.41	22.205	6048	10.08	5.04	543	0.905	0.4525	31.2	0.052	0.026	20.4	0.034	0.017	19976	19.976	33.2933	0.0332933	0.0166467
Rice, brown, wholegrain, raw	3000	5	15 x cup	9733	16.2217	8.11083	2101	3.50167	1.75083	231	0.385	0.1925	45	0.075	0.0375	7.7	0.0128333	0.00641667	7491	7.491	12.485	0.012485	0.0062425
Rice, wild, raw	5000	8.33333	31 x cup	16719	27.865	13.9325	3446	5.74333	2.87167	610	1.01667	0.508333	55	0.0916667	0.0458333	12.8	0.0213333	0.0106667	12485	12.485	20.8083	0.0208083	0.0104042
			Meal Totals	53097	88.495	44.2475	11595	19.325	9.6625	1384	2.30667	1.15333	131	0.218333	0.109167	41	0.0683333	0.0341667	39952	39.952	66.5867	0.0665867	0.0332933
Oatmeal						0			0			0			0			0					0
Lizis Original Granola	1000	1.66667	10 x cup	4814	8.02333	4.01167	433	0.721667	0.360833	98	0.163333	0.0816667	284	0.473333	0.236667	1.2	0.002	0.001	0	0	0	0	0
Porridge oats, unfortified	4000	6.66667	50 x cup	14946	24.91	12.455	2572	4.28667	2.14333	436	0.726667	0.363333	324	0.54	0.27	1.5	0.0025	0.00125	9664	9.664	16.1067	0.0161067	0.00805333
			Meal Totals	19761	32.935	16.4675	3004	5.00667	2.50333	534	0.89	0.445	608	1.01333	0.506667	2.7	0.0045	0.00225	9664	9.664	16.1067	0.0161067	0.00805333
Potatoes
Sweet potato, raw, flesh only	10000	16.6667	11 x extra large	8618	14.3633	7.18167	1967	3.27833	1.63917	120	0.2	0.1	30	0.05	0.025	5	0.00833333	0.00416667	3830	3.83	6.38333	0.00638333	0.00319167
Potatoes, old, raw, flesh only	20000	33.3333	54 x large whit/red 9-12cm diameter	16020	26.7	13.35	3580	5.96667	2.98333	380	0.633333	0.316667	20	0.0333333	0.0166667	12	0.02	0.01	223818	223.818	373.03	0.37303	0.186515
Potatoes, new and salad, flesh only, raw	10000	16.6667	238 x average	6658	11.0967	5.54833	1472	2.45333	1.22667	170	0.283333	0.141667	10	0.0166667	0.00833333	6	0.01	0.005	111909	111.909	186.515	0.186515	0.0932575
			Meal Totals	31296	52.16	26.08	7019	11.6983	5.84917	670	1.11667	0.558333	60	0.1	0.05	22.9	0.0381667	0.0190833	339557	339.557	565.928	0.565928	0.282964
Wheat & Rye (Bread)
Bread, sourdough, white	5000	8.33333	67 x Average serving	13974	23.29	11.645	2700	4.5	2.25	588	0.98	0.49	92	0.153333	0.0766667	4.7	0.00783333	0.00391667	5155	5.155	8.59167	0.00859167	0.00429583
Bread, white, average	9600	16	160 x Average Portion	22297	37.1617	18.5808	4285	7.14167	3.57083	835	1.39167	0.695833	202	0.336667	0.168333	9	0.015	0.0075	9898	9.898	16.4967	0.0164967	0.00824833
Bread, brown, average	4000	6.66667	62 x Average Portion	8157	13.595	6.7975	1543	2.57167	1.28583	316	0.526667	0.263333	80	0.133333	0.0666667	3.7	0.00616667	0.00308333	4124	4.124	6.87333	0.00687333	0.00343667
			Meal Totals	44427	74.045	37.0225	8529	14.215	7.1075	1739	2.89833	1.44917	373	0.621667	0.310833	17.4	0.029	0.0145	19177	19.177	31.9617	0.0319617	0.0159808
Maize (Meal)
Sweetcorn, kernels, 'on-the-cob', raw, weighed with core	5000	8.33333	36 x Long	1789	2.98167	1.49083	224	0.373333	0.186667	100	0.166667	0.0833333	55	0.0916667	0.0458333	8	0.0133333	0.00666667	3500	3.5	5.83333	0.00583333	0.00291667
Sweetcorn, baby, boiled in unsalted water	5000	8.33333	106 x Average Portion	1606	2.67667	1.33833	224	0.373333	0.186667	110	0.183333	0.0916667	30	0.05	0.025	8	0.0133333	0.00666667	3500	3.5	5.83333	0.00583333	0.00291667
			Meal Totals	3395	5.65833	2.82917	448	0.746667	0.373333	210	0.35	0.175	85	0.141667	0.0708333	16.1	0.0268333	0.0134167	7000	7	11.6667	0.0116667	0.00583333
Palm Oil
			Meal Totals	0	0	0	0	0	0	0	0	0	0	0	0	0	0	0	0	0	0	0	0
Soybean Oil
			Meal Totals	0	0	0	0	0	0	0	0	0	0	0	0	0	0	0	0	0	0	0	0
Olive Oil
Oil, olive	15000	25	65 x cup	134865	224.775	112.388	0	0	0	0	0	0	14985	24.975	12.4875	49	0.0816667	0.0408333	216233	216.233	360.388	0.360388	0.180194
			Meal Totals	134865	224.775	112.388	0	0	0	0	0	0	14985	24.975	12.4875	49	0.0816667	0.0408333	216233	216.233	360.388	0.360388	0.180194
Rapeseed Oil
			Meal Totals	0	0	0	0	0	0	0	0	0	0	0	0	0	0	0	0	0	0	0	0
Sunflower Oil
			Meal Totals	0	0	0	0	0	0	0	0	0	0	0	0	0	0	0	0	0	0	0	0
Tomatoes
Plum Tomatoes	2000	3.33333	7 x large/beef	272	0.453333	0.226667	58	0.0966667	0.0483333	10	0.0166667	0.00833333	0	0	0	0.308	0.000513333	0.000256667	1426	1.426	2.37667	0.00237667	0.00118833
Tomatoes, cherry, raw	2000	3.33333	14 x cup	466	0.776667	0.388333	72	0.12	0.06	22	0.0366667	0.0183333	10	0.0166667	0.00833333	1.9	0.00316667	0.00158333	428	0.428	0.713333	0.000713333	0.000356667
Tomatoes, canned, whole contents	15000	25	45 x can	3075	5.125	2.5625	570	0.95	0.475	165	0.275	0.1375	15	0.025	0.0125	2.3	0.00383333	0.00191667	10695	10.695	17.825	0.017825	0.0089125
			Meal Totals	3813	6.355	3.1775	700	1.16667	0.583333	197	0.328333	0.164167	25	0.0416667	0.0208333	4.5	0.0075	0.00375	12549	12.549	20.915	0.020915	0.0104575
Brassicas
Cauliflower, raw	8000	13.3333	70 x cup	2448	4.08	2.04	340	0.566667	0.283333	200	0.333333	0.166667	32	0.0533333	0.0266667	2.5	0.00416667	0.00208333	2280	2.28	3.8	0.0038	0.0019
Broccoli, green, raw	10000	16.6667	105 x cup, chopped	3492	5.82	2.91	308	0.513333	0.256667	430	0.716667	0.358333	60	0.1	0.05	6	0.01	0.005	3250	3.25	5.41667	0.00541667	0.00270833
Broccolini	6000	10	63 x cup, chopped	2100	3.5	1.75	186	0.31	0.155	258	0.43	0.215	36	0.06	0.03	3.6	0.006	0.003	1950	1.95	3.25	0.00325	0.001625
Curly kale, raw	2000	3.33333	111 x cup, 1 inch pieces, loosely packed	671	1.11833	0.559167	27.8	0.0463333	0.0231667	68	0.113333	0.0566667	32	0.0533333	0.0266667	2.9	0.00483333	0.00241667	0	0	0	0	0
Waitrose Cavolo Nero	3000	5	15 x Per pack	1008	1.68	0.84	42	0.07	0.035	102	0.17	0.085	48	0.08	0.04	2	0.00333333	0.00166667	1017	1.017	1.695	0.001695	0.0008475
			Meal Totals	9719	16.1983	8.09917	904	1.50667	0.753333	1058	1.76333	0.881667	208	0.346667	0.173333	17	0.0283333	0.0141667	8497	8.497	14.1617	0.0141617	0.00708083
Onions & Leeks
Onions, raw	10000	16.6667	42 x large	3586	5.97667	2.98833	774	1.29	0.645	100	0.166667	0.0833333	10	0.0166667	0.00833333	7.6	0.0126667	0.00633333	2903	2.903	4.83833	0.00483833	0.00241917
Spring onions, bulbs and tops, raw	1000	1.66667	91 x Average Portion	244	0.406667	0.203333	29.7	0.0495	0.02475	20	0.0333333	0.0166667	5	0.00833333	0.00416667	0.76	0.00126667	0.000633333	290	0.29	0.483333	0.000483333	0.000241667
Onions, red, raw	8000	13.3333	43 x large onion	2789	4.64833	2.32417	592	0.986667	0.493333	80	0.133333	0.0666667	11.2	0.0186667	0.00933333	6.1	0.0101667	0.00508333	2322	2.322	3.87	0.00387	0.001935
Leeks, raw	5000	8.33333	56 x leek	1202	2.00333	1.00167	203	0.338333	0.169167	75	0.125	0.0625	10	0.0166667	0.00833333	3.6	0.006	0.003	1695	1.695	2.825	0.002825	0.0014125
			Meal Totals	7821	13.035	6.5175	1599	2.665	1.3325	275	0.458333	0.229167	36.2	0.0603333	0.0301667	18	0.03	0.015	7210	7.21	12.0167	0.0120167	0.00600833
Root Vegetables
Beetroot, raw	4000	6.66667	50 x beet	1465	2.44167	1.22083	289	0.481667	0.240833	68	0.113333	0.0566667	4	0.00666667	0.00333333	0.96	0.0016	0.0008	0	0	0	0	0
Parsnip, raw	8000	13.3333	47 x Large Portion (Average)	5106	8.51	4.255	934	1.55667	0.778333	144	0.24	0.12	88	0.146667	0.0733333	2.3	0.00383333	0.00191667	0	0	0	0	0
Ginger, fresh	2000	3.33333	400 x thumb (2cm)	890	1.48333	0.741667	150	0.25	0.125	36	0.06	0.03	16	0.0266667	0.0133333	1.8	0.003	0.0015	3314	3.314	5.52333	0.00552333	0.00276167
Garlic, raw	2000	3.33333	158 x jumbo clove	1935	3.225	1.6125	299	0.498333	0.249167	158	0.263333	0.131667	12	0.02	0.01	1.1	0.00183333	0.000916667	1178	1.178	1.96333	0.00196333	0.000981667
Celeriac, raw	2000	3.33333	8 x medium	344	0.573333	0.286667	44	0.0733333	0.0366667	24	0.04	0.02	8	0.0133333	0.00666667	2	0.00333333	0.00166667	0	0	0	0	0
Carrots, old, raw	8000	13.3333	62 x cup, chopped	2794	4.65667	2.32833	586	0.976667	0.488333	40	0.0666667	0.0333333	32	0.0533333	0.0266667	10.2	0.017	0.0085	1560	1.56	2.6	0.0026	0.0013
			Meal Totals	12533	20.8883	10.4442	2303	3.83833	1.91917	470	0.783333	0.391667	160	0.266667	0.133333	18.4	0.0306667	0.0153333	6052	6.052	10.0867	0.0100867	0.00504333
Other Vegetables
Vegetable stock, homemade	200	0.333333	0.8 x 1 cup	17.2	0.0286667	0.0143333	3.5	0.00583333	0.00291667	0.5735	0.000955833	0.000477917	0.1517	0.000252833	0.000126417	0.36	0.0006	0.0003	0	0	0	0	0
Spinach, baby, raw	5000	8.33333	63 x NHS Serving (1 cereal bowl)	828	1.38	0.69	9.5	0.0158333	0.00791667	130	0.216667	0.108333	30	0.05	0.025	1.7	0.00283333	0.00141667	1460	1.46	2.43333	0.00243333	0.00121667
Peppers, bell, raw, mixed	10000	16.6667	83 x Average Portion	2590	4.31667	2.15833	480	0.8	0.4	100	0.166667	0.0833333	30	0.05	0.025	6.6	0.011	0.0055	73650	73.65	122.75	0.12275	0.061375
Waitrose 1 Padron Peppers	1000	1.66667		198	0.33	0.165	7	0.0116667	0.00583333	29	0.0483333	0.0241667	6	0.01	0.005	0	0	0	0	0	0	0	0
Lettuce, average, raw	600	1	8 x Large portion	68	0.113333	0.0566667	8.4	0.014	0.007	7.2	0.012	0.006	0.6	0.001	0.0005	1.6	0.00266667	0.00133333	142	0.142	0.236667	0.000236667	0.000118333
Lettuce, Cos, raw	600	1	17 x cup, chopped	97	0.161667	0.0808333	10.2	0.017	0.0085	6	0.01	0.005	3.6	0.006	0.003	1.6	0.00266667	0.00133333	142	0.142	0.236667	0.000236667	0.000118333
Lettuce, Iceberg, raw	1850	3.08333	23 x NHS serving (1 cereal bowl)	242	0.403333	0.201667	35.2	0.0586667	0.0293333	13	0.0216667	0.0108333	5.6	0.00933333	0.00466667	4.9	0.00816667	0.00408333	438	0.438	0.73	0.00073	0.000365
Fennel, Florence, raw	2000	3.33333	23 x bulb	251	0.418333	0.209167	35.8	0.0596667	0.0298333	18	0.03	0.015	4	0.00666667	0.00333333	0.96	0.0016	0.0008	0	0	0	0	0
Courgette, raw	6000	10	75 x Medium portion / NHS Serving	970	1.61667	0.808333	137	0.228333	0.114167	78	0.13	0.065	12	0.02	0.01	10.6	0.0176667	0.00883333	2016	2.016	3.36	0.00336	0.00168
Chard, Swiss, raw	2000	3.33333	42 x leaf	395	0.658333	0.329167	54	0.09	0.045	36	0.06	0.03	4	0.00666667	0.00333333	0.68	0.00113333	0.000566667	1668	1.668	2.78	0.00278	0.00139
Celery, raw	480	0.8	8 x full length stick	41	0.0683333	0.0341667	6.7	0.0111667	0.00558333	2.4	0.004	0.002	0.48	0.0008	0.0004	0.0864	0.000144	7.2e-05	0	0	0	0	0
Squash, butternut, raw	5000	8.33333	36 x cup cubes	1769	2.94833	1.47417	376	0.626667	0.313333	55	0.0916667	0.0458333	5	0.00833333	0.00416667	1.3	0.00216667	0.00108333	1680	1.68	2.8	0.0028	0.0014
Beans, green, raw	6000	10	86 x NHS Serving (4 tablespoons/1/2 cup)	1466	2.44333	1.22167	187	0.311667	0.155833	126	0.21	0.105	24	0.04	0.02	3	0.005	0.0025	3096	3.096	5.16	0.00516	0.00258
			Meal Totals	8933	14.8883	7.44417	1350	2.25	1.125	601	1.00167	0.500833	125	0.208333	0.104167	33.4	0.0556667	0.0278333	84293	84.293	140.488	0.140488	0.0702442
Berries
Mixed berries, frozen	4000	6.66667	29 x cup	1200	2	1	248	0.413333	0.206667	34	0.0566667	0.0283333	8	0.0133333	0.00666667	3.6	0.006	0.003	3864	3.864	6.44	0.00644	0.00322
Raspberries, raw	7500	12.5	115 x Half cup	1973	3.28833	1.64417	383	0.638333	0.319167	60	0.1	0.05	22.5	0.0375	0.01875	6.3	0.0105	0.00525	3098	3.098	5.16333	0.00516333	0.00258167
Strawberries, raw	2500	4.16667	10 x cup, puree	783	1.305	0.6525	153	0.255	0.1275	15	0.025	0.0125	12.5	0.0208333	0.0104167	4.3	0.00716667	0.00358333	868	0.868	1.44667	0.00144667	0.000723333
Blueberries	7500	12.5	313 x Average Portion	3135	5.225	2.6125	683	1.13833	0.569167	68	0.113333	0.0566667	15	0.025	0.0125	5.9	0.00983333	0.00491667	6338	6.338	10.5633	0.0105633	0.00528167
Blackberries, raw	2500	4.16667	498 x blackberries	715	1.19167	0.595833	140	0.233333	0.116667	27.5	0.0458333	0.0229167	5	0.00833333	0.00416667	1.1	0.00183333	0.000916667	1033	1.033	1.72167	0.00172167	0.000860833
			Meal Totals	7805	13.0083	6.50417	1606	2.67667	1.33833	204	0.34	0.17	63	0.105	0.0525	21.1	0.0351667	0.0175833	15199	15.199	25.3317	0.0253317	0.0126658
Bananas
Bananas, flesh only	6000	10	50 x Large	5135	8.55833	4.27917	1200	2	1	72	0.12	0.06	6	0.01	0.005	5.4	0.009	0.0045	4740	4.74	7.9	0.0079	0.00395
			Meal Totals	5135	8.55833	4.27917	1200	2	1	72	0.12	0.06	6	0.01	0.005	5.4	0.009	0.0045	4740	4.74	7.9	0.0079	0.00395
Apples
Apples, eating, raw, flesh and skin	6000	10	26 x Large	3167	5.27833	2.63917	688	1.14667	0.573333	36	0.06	0.03	30	0.05	0.025	1.7	0.00283333	0.00141667	23007	23.007	38.345	0.038345	0.0191725
Apple juice, fresh	50000	83.3333	167 x Tall tumbler	15970	26.6167	13.3083	3850	6.41667	3.20833	30	0.05	0.025	50	0.0833333	0.0416667	142	0.236667	0.118333	13350	13.35	22.25	0.02225	0.011125
			Meal Totals	19137	31.895	15.9475	4538	7.56333	3.78167	66	0.11	0.055	80	0.133333	0.0666667	144	0.24	0.12	36357	36.357	60.595	0.060595	0.0302975
Citrus
Limes, flesh only	2000	3.33333	41 x all sizes fruit	174	0.29	0.145	16	0.0266667	0.0133333	14	0.0233333	0.0116667	6	0.01	0.005	0.52	0.000866667	0.000433333	1284	1.284	2.14	0.00214	0.00107
Lemons, whole, without pips	2000	3.33333	15 x Average lemon	388	0.646667	0.323333	64	0.106667	0.0533333	20	0.0333333	0.0166667	6	0.01	0.005	0.52	0.000866667	0.000433333	1284	1.284	2.14	0.00214	0.00107
Citrus fruit, soft/easy peelers, flesh only	5000	8.33333	63 x Large	2092	3.48667	1.74333	466	0.776667	0.388333	35	0.0583333	0.0291667	10	0.0166667	0.00833333	1.9	0.00316667	0.00158333	11393	11.393	18.9883	0.0189883	0.00949417
Oranges, flesh only	11000	18.3333	45 x large/extra large fruit	4074	6.79	3.395	881	1.46833	0.734167	88	0.146667	0.0733333	22	0.0366667	0.0183333	3.6	0.006	0.003	7194	7.194	11.99	0.01199	0.005995
Orange juice, from concentrate	50000	83.3333	167 x Tall tumbler	18500	30.8333	15.4167	4390	7.31667	3.65833	290	0.483333	0.241667	50	0.0833333	0.0416667	23	0.0383333	0.0191667	50950	50.95	84.9167	0.0849167	0.0424583
			Meal Totals	25229	42.0483	21.0242	5816	9.69333	4.84667	447	0.745	0.3725	94	0.156667	0.0783333	29.6	0.0493333	0.0246667	72105	72.105	120.175	0.120175	0.0600875
Other Fruit
Apricots, dried	1000	1.66667	31 x Average Portion	1967	3.27833	1.63917	428	0.713333	0.356667	48	0.08	0.04	7	0.0116667	0.00583333	2.7	0.0045	0.00225	2279	2.279	3.79833	0.00379833	0.00189917
Passion fruit, flesh and pips	2000	3.33333	67 x average	738	1.23	0.615	114	0.19	0.095	52	0.0866667	0.0433333	8	0.0133333	0.00666667	0.7523	0.00125383	0.000626917	4557	4.557	7.595	0.007595	0.0037975
Plums, dessert, flesh and skin, raw	3000	5	21 x cup, chopped	1313	2.18833	1.09417	290	0.483333	0.241667	18	0.03	0.015	9	0.015	0.0075	0.78	0.0013	0.00065	6540	6.54	10.9	0.0109	0.00545
Pears, raw, flesh and skin	3000	5	17 x large	1364	2.27333	1.13667	325	0.541667	0.270833	9	0.015	0.0075	3	0.005	0.0025	2.3	0.00383333	0.00191667	2766	2.766	4.61	0.00461	0.002305
Peaches, raw, flesh and skin	3000	5	20 x Large	1029	1.715	0.8575	221	0.368333	0.184167	30	0.05	0.025	3	0.005	0.0025	1.2	0.002	0.001	2730	2.73	4.55	0.00455	0.002275
Nectarines, flesh and skin, raw	2000	3.33333	13 x Large	896	1.49333	0.746667	191	0.318333	0.159167	20	0.0333333	0.0166667	6	0.01	0.005	0.86	0.00143333	0.000716667	11649	11.649	19.415	0.019415	0.0097075
Melon, watermelon, flesh only	8000	13.3333	32 x Average slice	2597	4.32833	2.16417	555	0.925	0.4625	40	0.0666667	0.0333333	24	0.04	0.02	10.7	0.0178333	0.00891667	1880	1.88	3.13333	0.00313333	0.00156667
Pineapple, flesh only, raw	15000	25	16 ½ x total fruit (flesh only)	7125	11.875	5.9375	1673	2.78833	1.39417	75	0.125	0.0625	15	0.025	0.0125	20.1	0.0335	0.01675	3825	3.825	6.375	0.006375	0.0031875
Mangoes, ripe, flesh only, raw	8000	13.3333	35 x fruit (flesh)	3981	6.635	3.3175	831	1.385	0.6925	56	0.0933333	0.0466667	48	0.08	0.04	2.5	0.00416667	0.00208333	14400	14.4	24	0.024	0.012
Melon, Canteloupe-type, flesh only	8000	13.3333	62 x Average slice	1608	2.68	1.34	336	0.56	0.28	48	0.08	0.04	8	0.0133333	0.00666667	2	0.00333333	0.00166667	7728	7.728	12.88	0.01288	0.00644
Grapes, average	8000	13.3333	80 x Small bunch	5520	9.2	4.6	1288	2.14667	1.07333	56	0.0933333	0.0466667	16	0.0266667	0.0133333	3	0.005	0.0025	4864	4.864	8.10667	0.00810667	0.00405333
Kiwi fruit, flesh only, raw	5000	8.33333	83 x medium	2279	3.79833	1.89917	429	0.715	0.3575	40	0.0666667	0.0333333	45	0.075	0.0375	1.9	0.00316667	0.00158333	2570	2.57	4.28333	0.00428333	0.00214167
Cucumber, raw, flesh and skin	7200	12	0 x cup slices	1022	1.70333	0.851667	86	0.143333	0.0716667	72	0.12	0.06	43	0.0716667	0.0358333	1.7	0.00283333	0.00141667	2542	2.542	4.23667	0.00423667	0.00211833
Cherries, flesh and skin, raw	4000	6.66667	74 x Average Portion	2672	4.45333	2.22667	584	0.973333	0.486667	48	0.08	0.04	16	0.0266667	0.0133333	1.8	0.003	0.0015	6416	6.416	10.6933	0.0106933	0.00534667
Coconut, desiccated	1000	1.66667	12 x cup	6049	10.0817	5.04083	61	0.101667	0.0508333	56	0.0933333	0.0466667	620	1.03333	0.516667	1.8	0.003	0.0015	2093	2.093	3.48833	0.00348833	0.00174417
Avocado, Hass, flesh only, weighed with skin and stone	8400	14	37 x Cup, Puree	9915	16.525	8.2625	102	0.17	0.085	109	0.181667	0.0908333	1008	1.68	0.84	11.3	0.0188333	0.00941667	16640	16.64	27.7333	0.0277333	0.0138667
			Meal Totals	50076	83.46	41.73	7514	12.5233	6.26167	777	1.295	0.6475	1879	3.13167	1.56583	65	0.108333	0.0541667	93478	93.478	155.797	0.155797	0.0778983
Cane Sugar
Sugar, brown	1000	1.66667	4 ¼ x cup packed	3863	6.43833	3.21917	965	1.60833	0.804167	1	0.00166667	0.000833333	0	0	0	0.32	0.000533333	0.000266667	893	0.893	1.48833	0.00148833	0.000744167
			Meal Totals	3863	6.43833	3.21917	965	1.60833	0.804167	1	0.00166667	0.000833333	0	0	0	0.32	0.000533333	0.000266667	893	0.893	1.48833	0.00148833	0.000744167
Beet Sugar
			Meal Totals	0	0	0	0	0	0	0	0	0	0	0	0	0	0	0	0	0	0	0	0
Beer (5% ABV)
			Meal Totals	0	0	0	0	0	0	0	0	0	0	0	0	0	0	0	0	0	0	0	0
Wine (12.5% ABV)
			Meal Totals	0	0	0	0	0	0	0	0	0	0	0	0	0	0	0	0	0	0	0	0
Dark Chocolate
Chocolate, dark, 70-84% Cocoa	100	0.166667	6 x Average Portion	542	0.903333	0.451667	32	0.0533333	0.0266667	9.1	0.0151667	0.00758333	42	0.07	0.035	0.271	0.000451667	0.000225833	1720	1.72	2.86667	0.00286667	0.00143333
			Meal Totals	542	0.903333	0.451667	32	0.0533333	0.0266667	9.1	0.0151667	0.00758333	42	0.07	0.035	0.271	0.000451667	0.000225833	1720	1.72	2.86667	0.00286667	0.00143333
Coffee
			Meal Totals	0	0	0	0	0	0	0	0	0	0	0	0	0	0	0	0	0	0	0	0
Herbs
Mixed herbs, dried	1000	1.66667	500 x tablespoon	2689	4.48167	2.24083	360	0.6	0.3	121	0.201667	0.100833	85	0.141667	0.0708333	1	0.00166667	0.000833333	0	0	0	0	0
Bay leaf, dried	35	0.0583333	50 x average	105	0.175	0.0875	17	0.0283333	0.0141667	2.7	0.0045	0.00225	2.9	0.00483333	0.00241667	0.0335	5.58333e-05	2.79167e-05	0	0	0	0	0
Basil, fresh	125	0.208333	250 x leaves	50	0.0833333	0.0416667	6.4	0.0106667	0.00533333	3.9	0.0065	0.00325	1	0.00166667	0.000833333	0.1192	0.000198667	9.93333e-05	0	0	0	0	0
Thyme, fresh	60	0.1	1 x cup chopped	57	0.095	0.0475	9.1	0.0151667	0.00758333	1.8	0.003	0.0015	1.5	0.0025	0.00125	0.0572	9.53333e-05	4.76667e-05	0	0	0	0	0
Tarragon, fresh	15	0.025	4 x tbsp	7.3	0.0121667	0.00608333	0.945	0.001575	0.0007875	0.51	0.00085	0.000425	0.165	0.000275	0.0001375	0.0143	2.38333e-05	1.19167e-05	0	0	0	0	0
Sage, fresh	15	0.025	4 x tbsp	17.9	0.0298333	0.0149167	2.3	0.00383333	0.00191667	0.585	0.000975	0.0004875	0.69	0.00115	0.000575	0.0143	2.38333e-05	1.19167e-05	0	0	0	0	0
Rosemary, fresh	60	0.1	35 x tbsp	60	0.1	0.05	8.1	0.0135	0.00675	0.84	0.0014	0.0007	2.6	0.00433333	0.00216667	0.0572	9.53333e-05	4.76667e-05	0	0	0	0	0
Parsley, fresh	100	0.166667	100 x sprigs	34.3	0.0571667	0.0285833	2.7	0.0045	0.00225	3	0.005	0.0025	1.3	0.00216667	0.00108333	0.0953	0.000158833	7.94167e-05	0	0	0	0	0
Mint, fresh	25	0.0416667	25 x sprigs	10.2	0.017	0.0085	1.2	0.002	0.001	0.95	0.00158333	0.000791667	0.175	0.000291667	0.000145833	0.0238	3.96667e-05	1.98333e-05	7.2	0.0072	0.012	1.2e-05	6e-06
Dill, fresh	15	0.025	4 x tbsp	3.8	0.00633333	0.00316667	0.132	0.00022	0.00011	0.555	0.000925	0.0004625	0.12	0.0002	0.0001	0.0143	2.38333e-05	1.19167e-05	0	0	0	0	0
Coriander leaves, fresh	25	0.0416667	25 x sprigs	4.4	0.00733333	0.00366667	0.2925	0.0004875	0.00024375	0.525	0.000875	0.0004375	0.125	0.000208333	0.000104167	0.0306	5.1e-05	2.55e-05	207	0.207	0.345	0.000345	0.0001725
Chives, fresh	15	0.025	5 x tablespoon	4.1	0.00683333	0.00341667	0.285	0.000475	0.0002375	0.495	0.000825	0.0004125	0.105	0.000175	8.75e-05	0.0152	2.53333e-05	1.26667e-05	0	0	0	0	0
Chervil, dried	15	0.025	7 ½ x tablespoon	42	0.07	0.035	5.7	0.0095	0.00475	3.5	0.00583333	0.00291667	0.585	0.000975	0.0004875	0.0143	2.38333e-05	1.19167e-05	0	0	0	0	0
			Meal Totals	3084	5.14	2.57	414	0.69	0.345	140	0.233333	0.116667	96	0.16	0.08	1.5	0.0025	0.00125	214	0.214	0.356667	0.000356667	0.000178333
Funghi
Mushrooms, oyster, raw	500	0.833333	7 x cup	41	0.0683333	0.0341667	0	0	0	8	0.0133333	0.00666667	1	0.00166667	0.000833333	0.135	0.000225	0.0001125	306	0.306	0.51	0.00051	0.000255
Mushrooms, white, raw	5000	8.33333	71 x cup, pieces	350	0.583333	0.291667	15	0.025	0.0125	50	0.0833333	0.0416667	10	0.0166667	0.00833333	1.4	0.00233333	0.00116667	3059	3.059	5.09833	0.00509833	0.00254917
			Meal Totals	391	0.651667	0.325833	15	0.025	0.0125	58	0.0966667	0.0483333	11	0.0183333	0.00916667	1.5	0.0025	0.00125	3365	3.365	5.60833	0.00560833	0.00280417
Spices
Pepper, cayenne, ground	100	0.166667	17 x tablespoon	331	0.551667	0.275833	31.7	0.0528333	0.0264167	12	0.02	0.01	17.3	0.0288333	0.0144167	0.1152	0.000192	9.6e-05	28.8	0.0288	0.048	4.8e-05	2.4e-05
Chilli powder	100	0.166667	12 ½ x tablespoon	211	0.351667	0.175833	7.2	0.012	0.006	13.5	0.0225	0.01125	14.3	0.0238333	0.0119167	0.0821	0.000136833	6.84167e-05	227	0.227	0.378333	0.000378333	0.000189167
Cinnamon, ground	200	0.333333	29 x tablespoon	71	0.118333	0.0591667	4.4	0.00733333	0.00366667	8	0.0133333	0.00666667	2.4	0.004	0.002	0.2028	0.000338	0.000169	0	0	0	0	0
Onion Granules	1000	1.66667	741 x ½ of a teaspoon	3620	6.03333	3.01667	750	1.25	0.625	101	0.168333	0.0841667	11	0.0183333	0.00916667	0.6978	0.001163	0.0005815	0	0	0	0	0
Paprika	500	0.833333	74 x tablespoon	1068	1.78	0.89	51	0.085	0.0425	71	0.118333	0.0591667	65	0.108333	0.0541667	0.5758	0.000959667	0.000479833	0	0	0	0	0
Star Anise	50	0.0833333		182	0.303333	0.151667	18.8	0.0313333	0.0156667	8.8	0.0146667	0.00733333	8	0.0133333	0.00666667	0		0	0	0	0	0	0
Garlic powder	1000	1.66667	103 x tablespoon	2421	4.035	2.0175	391	0.651667	0.325833	187	0.311667	0.155833	12	0.02	0.01	0.821	0.00136833	0.000684167	2265	2.265	3.775	0.003775	0.0018875
Pepper, black	2050	3.41667	297 x tablespoon	1511	2.51833	1.25917	12.3	0.0205	0.01025	213	0.355	0.1775	68	0.113333	0.0566667	2.4	0.004	0.002	590	0.59	0.983333	0.000983333	0.000491667
			Meal Totals	9415	15.6917	7.84583	1267	2.11167	1.05583	614	1.02333	0.511667	197	0.328333	0.164167	4.9	0.00816667	0.00408333	3111	3.111	5.185	0.005185	0.0025925
Condiments
Jam, fruit with no seeds	2000	3.33333	100 x Individual carton	5272	8.78667	4.39333	1312	2.18667	1.09333	6	0.01	0.005	0	0	0	2.8	0.00466667	0.00233333	1785	1.785	2.975	0.002975	0.0014875
Mayonnaise, standard, retail	3000	5	91 x heaped tablespoon	20606	34.3433	17.1717	70	0.116667	0.0583333	33	0.055	0.0275	2244	3.74	1.87	6.1	0.0101667	0.00508333	0	0	0	0	0
Tomato ketchup	3000	5	125 x tablespoon	3553	5.92167	2.96083	833	1.38833	0.694167	48	0.08	0.04	3	0.005	0.0025	4.4	0.00733333	0.00366667	1602	1.602	2.67	0.00267	0.001335
Sweet chilli sauce	3000	5	150 x tablespoon	7350	12.25	6.125	1725	2.875	1.4375	45	0.075	0.0375	30	0.05	0.025	2.3	0.00383333	0.00191667	1839	1.839	3.065	0.003065	0.0015325
Vanilla essence, no alcohol	100	0.166667	20 x teaspoon	0.12	0.0002	0.0001	0	0	0	0.03	5e-05	2.5e-05	0	0	0	0.43	0.000716667	0.000358333	12651	12.651	21.085	0.021085	0.0105425
Sea Salt	5000	8.33333	625 x heaped teaspoon	0	0	0	0	0	0	0	0	0	0	0	0	3.2	0.00533333	0.00266667	0	0	0	0	0
			Meal Totals	36781	61.3017	30.6508	3940	6.56667	3.28333	132	0.22	0.11	2277	3.795	1.8975	19.3	0.0321667	0.0160833	17877	17.877	29.795	0.029795	0.0148975
Beverages
Water, bottled, average	115500	192.5	116 x Litre bottle	0	0	0	0	0	0	0	0	0	0	0	0	57	0.095	0.0475	116	0.116	0.193333	0.000193333	9.66667e-05
Nix and Kix Mango Ginger 750ml	37500	62.5	50 x Per pack	7088	11.8133	5.90667	1650	2.75	1.375	37.5	0.0625	0.03125	37.5	0.0625	0.03125	68	0.113333	0.0566667	0	0	0	0	0
MOJU Cold Pressed Turmeric Booster Shot 60ml	3000	5	50 x Per pack	1680	2.8	1.4	261	0.435	0.2175	51	0.085	0.0425	48	0.08	0.04	3	0.005	0.0025	0	0	0	0	0
MOJU Cold Pressed Ginger Booster Shot 60ml	3000	5	50 x Per pack	1419	2.365	1.1825	297	0.495	0.2475	24	0.04	0.02	15	0.025	0.0125	3	0.005	0.0025	0	0	0	0	0
Grape juice, unsweetened	12500	20.8333	42 x Tall tumbler	8263	13.7717	6.88583	2000	3.33333	1.66667	37.5	0.0625	0.03125	12.5	0.0208333	0.0104167	35.5	0.0591667	0.0295833	8438	8.438	14.0633	0.0140633	0.00703167
			Meal Totals	18449	30.7483	15.3742	4208	7.01333	3.50667	150	0.25	0.125	113	0.188333	0.0941667	166	0.276667	0.138333	8553	8.553	14.255	0.014255	0.0071275
			Plan Total:	1069587	1782.64	891.322	101747	169.578	84.7892	62655	104.425	52.2125	45823	76.3717	38.1858	2345	3.90833	1.95417	2759565	2759.57	4599.27	4.59927	2.29964
			STDEV	14601	24.335	12.1675	1310.17	2.18362	1.09181	1202.08	2.00347	1.00174	1332.09	2.22015	1.11008	41.571	0.0694819	0.0346425	48826	48.826	81.3766	0.0813766	0.0406883
			CONFIDENCE NORM	2306.06	3.84343	1.92171	206.927	0.344878	0.172439	189.855	0.316426	0.158213	210.388	0.350647	0.175324	6.56566	0.0109739	0.00547138	7711.5	7.7115	12.8525	0.0128525	0.00642625
			CONFIDENCE LOWER LIMIT	1.06728e+06	1778.8	889.401	101540	169.233	84.6167	62465.1	104.109	52.0543	45612.6	76.021	38.0105	2338.43	3.89736	1.9487	2.75185e+06	2751.85	4586.42	4.58642	2.29321
			CONFIDENCE UPPER LIMIT	1.07189e+06	1786.49	893.244	101954	169.923	84.9616	62844.9	104.741	52.3707	46033.4	76.7223	38.3612	2351.57	3.91931	1.95964	2.76728e+06	2767.28	4612.13	4.61213	2.30606

## Sheet: TEAM TWO
Food Name	Quantity (g)	Quantity Per Person (g)	Measure	Energy (kcal)	Calories Per Person per Day (Kcals)	Calories Per Person per Service (Kcals)	Carbohydrate (g)	Carbohydrate Per Person Per Day (g)	Carbohydrate Per Person Per Service (g)	Protein (g)	Protein Per Person Per Day (g)	Protein Per Person Per Service (g)	Fat (g)	Fat Per Person Per Day (g)	Fat Per Person Per Service (g)	Foodprint CO2 (kg.CO2.eq)	Foodprint CO2 Per Person Per Day (kg.CO2.eq)	Foodprint CO2 Per Person Per Service (kg.CO2.eq)	Foodprint Water (L)	Foodprint Water (kL.eq)	Foodprint Water Per Person Per Day (L)	Foodprint Water Per Person Per Day (kL.eq)	Foodprint Water Per Person Per Service (kL.eq)
Beef (Beef Herd)
Beef, lean, average, raw	9000	11.25	38 x Large	11583	14.4787	7.23937	0	0	0	2025	2.53125	1.26562	387	0.48375	0.241875	239	0.29875	0.149375	238185	238.185	297.731	0.297731	0.148866
Beef, mince, raw, extra lean	21000	26.25	88 x Extra large	26334	32.9175	16.4587	0	0	0	4599	5.74875	2.87438	882	1.1025	0.55125	444	0.555	0.2775	555765	555.765	694.706	0.694706	0.347353
	30000	37.5	Meal Totals	37917	47.3963	23.6981	0	0	0	6624	8.28	4.14	1269	1.58625	0.793125	684	0.855	0.4275	793950	793.95	992.438	0.992437	0.496219
Lamb & Mutton
				0	0	0	0	0	0	0	0	0	0	0	0	0	0	0	0	0	0	0	0
Beef (Dairy Herd)
				0	0	0	0	0	0	0	0	0	0	0	0	0	0	0	0	0	0	0	0
Crustaceans (Farmed)
Prawns, king, raw	4750	5.9375	34 x Medium Portion (1 Cup)	3643	4.55375	2.27687	0	0	0	836	1.045	0.5225	33.3	0.041625	0.0208125	37.1	0.046375	0.0231875	8256	8.256	10.32	0.01032	0.00516
			Meal Totals	3643	4.55375	2.27687	0	0	0	836	1.045	0.5225	33.3	0.041625	0.0208125	37.1	0.046375	0.0231875	8256	8.256	10.32	0.01032	0.00516
Cheese
Cheese, Feta	1500	1.875	250 x 1cm cubes	3749	4.68625	2.34313	21.5	0.026875	0.0134375	234	0.2925	0.14625	303	0.37875	0.189375	12.3	0.015375	0.0076875	14115	14.115	17.6438	0.0176437	0.00882187
Cheese, Mozzarella, fresh	3000	3.75	24 x Average ball	7713	9.64125	4.82062	0	0	0	558	0.6975	0.34875	609	0.76125	0.380625	45	0.05625	0.028125	28230	28.23	35.2875	0.0352875	0.0176437
Cheese, Parmesan, fresh	1100	1.375	73 x tablespoon	4571	5.71375	2.85688	9.5	0.011875	0.0059375	398	0.4975	0.24875	327	0.40875	0.204375	16.9	0.021125	0.0105625	11220	11.22	14.025	0.014025	0.0070125
			Meal Totals	16033	20.0413	10.0206	30.9	0.038625	0.0193125	1190	1.4875	0.74375	1239	1.54875	0.774375	74	0.0925	0.04625	53565	53.565	66.9562	0.0669562	0.0334781
Pig Meat
Morrisons Italian Diced Pancetta 140g	750	0.9375	5 x Per pack	2505	3.13125	1.56563	0	0	0	120	0.15	0.075	225	0.28125	0.140625	11.9	0.014875	0.0074375	4679	4.679	5.84875	0.00584875	0.00292437
Chorizo, Raw	2000	2.5	67 x Average portion	8346	10.4325	5.21625	44	0.055	0.0275	490	0.6125	0.30625	690	0.8625	0.43125	23	0.02875	0.014375	12476	12.476	15.595	0.015595	0.0077975
Ham	1000	1.25	25 x Average Portion	1073	1.34125	0.670625	10	0.0125	0.00625	184	0.23	0.115	33	0.04125	0.020625	5.1	0.006375	0.0031875	6116	6.116	7.645	0.007645	0.0038225
			Meal Totals	11924	14.905	7.4525	54	0.0675	0.03375	794	0.9925	0.49625	948	1.185	0.5925	40	0.05	0.025	23271	23.271	29.0888	0.0290888	0.0145444
Fish (Farmed)
Haddock, flesh only, raw	1900	2.375	12 x Large	1421	1.77625	0.888125	0	0	0	338	0.4225	0.21125	7.6	0.0095	0.00475	6.5	0.008125	0.0040625	3751	3.751	4.68875	0.00468875	0.00234437
Salmon, farmed, flesh only, raw	4800	6	27 x large fillet	10397	12.9962	6.49812	0	0	0	979	1.22375	0.611875	720	0.9	0.45	16.7	0.020875	0.0104375	10526	10.526	13.1575	0.0131575	0.00657875
Cod, flesh only, raw	4250	5.3125	24 x Large	3205	4.00625	2.00312	0	0	0	744	0.93	0.465	25.5	0.031875	0.0159375	9.1	0.011375	0.0056875	11824	11.824	14.78	0.01478	0.00739
Sea Bass or bream, raw	4000	5	25 x fillet	3669	4.58625	2.29312	0	0	0	737	0.92125	0.460625	80	0.1	0.05	13.1	0.016375	0.0081875	26096	26.096	32.62	0.03262	0.01631
			Meal Totals	18691	23.3637	11.6819	0	0	0	2798	3.4975	1.74875	833	1.04125	0.520625	45	0.05625	0.028125	52197	52.197	65.2463	0.0652463	0.0326231
Poultry Meat									0
Chicken thigh, grilled	17000	21.25	85 x Large portion	50150	62.6875	31.3438	0	0	0	3893	4.86625	2.43312	3842	4.8025	2.40125	62	0.0775	0.03875	56613	56.613	70.7662	0.0707663	0.0353831
Bone broth or stock, chicken, homemade, bones removed	500	0.625	2 x cup	82	0.1025	0.05125	0	0	0	11.3	0.014125	0.0070625	4.1	0.005125	0.0025625	0.0105	1.3125e-05	6.5625e-06	0	0	0	0	0
Chicken, light meat, raw	44900	56.125	257 x cup, diced	47549	59.4363	29.7181	0	0	0	10776	13.47	6.735	494	0.6175	0.30875	117	0.14625	0.073125	149526	149.526	186.907	0.186908	0.0934538
Duck, roasted, meat only	4000	5	9 x duck	7792	9.74	4.87	0	0	0	1012	1.265	0.6325	416	0.52	0.26	16.4	0.0205	0.01025	17300	17.3	21.625	0.021625	0.0108125
			Meal Totals	105573	131.966	65.9831	0	0	0	15692	19.615	9.8075	4756	5.945	2.9725	195	0.24375	0.121875	223439	223.439	279.299	0.279299	0.139649
Eggs
Eggs, chicken, whole, raw	13700	17.125	204 x Jumbo, Size 1	18002	22.5025	11.2513	0	0	0	1726	2.1575	1.07875	1233	1.54125	0.770625	47	0.05875	0.029375	49758	49.758	62.1975	0.0621975	0.0310987
			Meal Totals	18002	22.5025	11.2513	0	0	0	1726	2.1575	1.07875	1233	1.54125	0.770625	47	0.05875	0.029375	49758	49.758	62.1975	0.0621975	0.0310987
Tofu
			Meal Totals	0	0	0	0	0	0	0	0	0	0	0	0	0	0	0	0	0	0	0	0
Groundnuts
Peanut butter, smooth	3500	4.375	140 x Thick spread on slice	21217	26.5212	13.2606	427	0.53375	0.266875	798	0.9975	0.49875	1813	2.26625	1.13312	2.9	0.003625	0.0018125	11823	11.823	14.7788	0.0147788	0.00738938
			Meal Totals	21217	26.5212	13.2606	427	0.53375	0.266875	798	0.9975	0.49875	1813	2.26625	1.13312	2.9	0.003625	0.0018125	11823	11.823	14.7788	0.0147788	0.00738938
Other Pulses
Beans, red kidney, canned in water, re-heated, drained	800	1	3 x can (drained)	788	0.985	0.4925	110	0.1375	0.06875	69	0.08625	0.043125	8	0.01	0.005	1.7	0.002125	0.0010625	641	0.641	0.80125	0.00080125	0.000400625
Baked beans, canned in tomato sauce	6500	8.125	15 ½ x large can	5209	6.51125	3.25563	904	1.13	0.565	325	0.40625	0.203125	32.5	0.040625	0.0203125	9.4	0.01175	0.005875	5207	5.207	6.50875	0.00650875	0.00325437
			Meal Totals	5997	7.49625	3.74812	1014	1.2675	0.63375	394	0.4925	0.24625	41	0.05125	0.025625	11.1	0.013875	0.0069375	5847	5.847	7.30875	0.00730875	0.00365438
Peas
Peas, frozen, raw	2500	3.125	31 x NHS serving = 3 tablespoons	1695	2.11875	1.05937	252	0.315	0.1575	133	0.16625	0.083125	17.5	0.021875	0.0109375	6.4	0.008	0.004	4948	4.948	6.185	0.006185	0.0030925
Peas, mange-tout, raw	1500	1.875	19 x NHS serving = 1 handful (20 peas)	489	0.61125	0.305625	62	0.0775	0.03875	54	0.0675	0.03375	3	0.00375	0.001875	3.8	0.00475	0.002375	2969	2.969	3.71125	0.00371125	0.00185563
Peas, sugar-snap, raw	2250	2.8125	23 x NHS serving = handful (14 beans)	782	0.9775	0.48875	109	0.13625	0.068125	77	0.09625	0.048125	4.5	0.005625	0.0028125	5.7	0.007125	0.0035625	4453	4.453	5.56625	0.00556625	0.00278313
			Meal Totals	2966	3.7075	1.85375	422	0.5275	0.26375	263	0.32875	0.164375	25	0.03125	0.015625	15.9	0.019875	0.0099375	12369	12.369	15.4612	0.0154612	0.00773062
Nuts
			Meal Totals		0	0	0	0	0	0	0	0	0	0	0	0	0	0	0	0	0	0	0
Grains
Pasta, egg, fresh, filled with green vegetables/herbs and cheese, boiled in unsalted water	1500	1.875	6 x medium	2871	3.58875	1.79438	392	0.49	0.245	131	0.16375	0.081875	87	0.10875	0.054375	4.7	0.005875	0.0029375	6956	6.956	8.695	0.008695	0.0043475
Breakfast cereal, rice, chocolate flavoured, fortified	500	0.625	14 x cups (large serving)	1858	2.3225	1.16125	416	0.52	0.26	23	0.02875	0.014375	11.5	0.014375	0.0071875	1.3	0.001625	0.0008125	0	0	0	0	0
Breakfast cereal, wheat biscuits, Weetabix type, fortified	1500	1.875	41 x Average Portion	4868	6.085	3.0425	995	1.24375	0.621875	158	0.1975	0.09875	28.5	0.035625	0.0178125	2.1	0.002625	0.0013125	0	0	0	0	0
Breakfast cereal, cornflakes, frosted, fortified	2000	2.5	27 x Very large portion	6934	8.6675	4.33375	1617	2.02125	1.01063	94	0.1175	0.05875	10	0.0125	0.00625	5.3	0.006625	0.0033125	0	0	0	0	0
Propercorn popcorn, Sweet and Salty flavour	960	1.2	32 x bag	4068	5.085	2.5425	613	0.76625	0.383125	62	0.0775	0.03875	152	0.19	0.095	2.4	0.003	0.0015	0	0	0	0	0
Noodles, egg, dried, raw	400	0.5	10 ½ x cup	1322	1.6525	0.82625	265	0.33125	0.165625	48	0.06	0.03	8	0.01	0.005	1.3	0.001625	0.0008125	1855	1.855	2.31875	0.00231875	0.00115938
Corn Flour, wholegrain	750	0.9375	6 x cup	2556	3.195	1.5975	522	0.6525	0.32625	52	0.065	0.0325	29	0.03625	0.018125	0.885	0.00110625	0.000553125	1387	1.387	1.73375	0.00173375	0.000866875
Pasta, white, dried, raw	15000	18.75	158 x cup	50280	62.85	31.425	10335	12.9187	6.45937	1695	2.11875	1.05937	240	0.3	0.15	15.2	0.019	0.0095	19920	19.92	24.9	0.0249	0.01245
			Meal Totals	74758	93.4475	46.7238	15154	18.9425	9.47125	2262	2.8275	1.41375	566	0.7075	0.35375	33.2	0.0415	0.02075	30117	30.117	37.6463	0.0376462	0.0188231
Milk
Margarine, Flora Original	875	1.09375	3 x cup	3568	4.46	2.23	4.4	0.0055	0.00275	1.8	0.00225	0.001125	394	0.4925	0.24625	3.7	0.004625	0.0023125	4859	4.859	6.07375	0.00607375	0.00303688
Butter, unsalted	1008	1.26	5 x cup, cubed	7504	9.38	4.69	5.7	0.007125	0.0035625	6	0.0075	0.00375	829	1.03625	0.518125	9.1	0.011375	0.0056875	5597	5.597	6.99625	0.00699625	0.00349812
Yogurt, whole milk, plain	6250	7.8125	42 x Larger pot	5008	6.26	3.13	474	0.5925	0.29625	356	0.445	0.2225	188	0.235	0.1175	12.5	0.015625	0.0078125	10369	10.369	12.9612	0.0129613	0.00648063
Ubley Low Fat Natural Yogurt 150g	2700	3.375	18 x Per pack	1569	1.96125	0.980625	157	0.19625	0.098125	132	0.165	0.0825	46	0.0575	0.02875	5.4	0.00675	0.003375	4479	4.479	5.59875	0.00559875	0.00279937
Yogurt, low fat, fruit	22080	27.6	177 x Average Portion	17474	21.8425	10.9213	2895	3.61875	1.80937	927	1.15875	0.579375	243	0.30375	0.151875	44	0.055	0.0275	36631	36.631	45.7888	0.0457888	0.0228944
Cream, fresh, double, including Jersey cream	2820	3.525	94 x Average Portion	13992	17.49	8.745	46	0.0575	0.02875	45	0.05625	0.028125	1514	1.8925	0.94625	15.9	0.019875	0.0099375	10823	10.823	13.5288	0.0135288	0.00676438
Milk, semi-skimmed, pasteurised, average	55620	69.525	222 x cup / serving	26264	32.83	16.415	2492	3.115	1.5575	1947	2.43375	1.21687	946	1.1825	0.59125	85	0.10625	0.053125	88936	88.936	111.17	0.11117	0.055585
Yogurt, Greek, plain, whole	7000	8.75	47 x Larger pot	8218	10.2725	5.13625	266	0.3325	0.16625	686	0.8575	0.42875	490	0.6125	0.30625	14	0.0175	0.00875	11613	11.613	14.5162	0.0145162	0.00725812
Chocolate, milk	1250	1.5625	31 x standard bar	6531	8.16375	4.08188	667	0.83375	0.416875	91	0.11375	0.056875	389	0.48625	0.243125	4.5	0.005625	0.0028125	0	0	0	0	0
Ice cream, dairy, vanilla, soft scoop	4500	5.625	60 x average serving	7711	9.63875	4.81937	954	1.1925	0.59625	144	0.18	0.09	369	0.46125	0.230625	4.6	0.00575	0.002875	0	0	0	0	0
			Meal Totals	97839	122.299	61.1494	7959	9.94875	4.97438	4337	5.42125	2.71062	5406	6.7575	3.37875	199	0.24875	0.124375	173308	173.308	216.635	0.216635	0.108317
Soymilk
Soya Yogurt, plain	1200	1.5	8 x Larger pot	560	0.7	0.35	28.8	0.036	0.018	49	0.06125	0.030625	27.6	0.0345	0.01725	2.4	0.003	0.0015	1991	1.991	2.48875	0.00248875	0.00124438
			Meal Totals	560	0.7	0.35	28.8	0.036	0.018	49	0.06125	0.030625	27.6	0.0345	0.01725	2.4	0.003	0.0015	1991	1.991	2.48875	0.00248875	0.00124438
Other Milk
Almond Milk, unsweetened	1500	1.875	6 x cup / serving	613	0.76625	0.383125	7.4	0.00925	0.004625	22	0.0275	0.01375	55	0.06875	0.034375	1.5	0.001875	0.0009375	5645	5.645	7.05625	0.00705625	0.00352813
			Meal Totals	613	0.76625	0.383125	7.4	0.00925	0.004625	22	0.0275	0.01375	55	0.06875	0.034375	1.5	0.001875	0.0009375	5645	5.645	7.05625	0.00705625	0.00352813
Cassava
			Meal Totals	0	0	0	0	0	0	0	0	0	0	0	0	0	0	0	0	0	0	0	0
Rice (Flooded)
Rice pudding, homemade	1500	1.875	4 x Tin	3536	4.42	2.21	695	0.86875	0.434375	78	0.0975	0.04875	50	0.0625	0.03125	3	0.00375	0.001875	2757	2.757	3.44625	0.00344625	0.00172313
Rice, white, jasmine, raw	3000	3.75	17 x cup	10473	13.0913	6.54563	2346	2.9325	1.46625	225	0.28125	0.140625	21	0.02625	0.013125	7.7	0.009625	0.0048125	7491	7.491	9.36375	0.00936375	0.00468187
Rice, white, long grain, raw	5000	6.25	50 x Half cup	17246	21.5575	10.7788	3864	4.83	2.415	335	0.41875	0.209375	50	0.0625	0.03125	14.3	0.017875	0.0089375	516790	516.79	645.987	0.645987	0.322994
			Meal Totals	31255	39.0688	19.5344	6905	8.63125	4.31562	638	0.7975	0.39875	121	0.15125	0.075625	25	0.03125	0.015625	527038	527.038	658.798	0.658798	0.329399
Oatmeal
Lizis Original Granola	1500	1.875	15 x cup	7221	9.02625	4.51312	649	0.81125	0.405625	146	0.1825	0.09125	425	0.53125	0.265625	1.8	0.00225	0.001125	0	0	0	0	0
Porridge oats, unfortified	1250	1.5625	100 x cup	4671	5.83875	2.91938	804	1.005	0.5025	136	0.17	0.085	101	0.12625	0.063125	0.475	0.00059375	0.000296875	3020	3.02	3.775	0.003775	0.0018875
			Meal Totals	11892	14.865	7.4325	1452	1.815	0.9075	283	0.35375	0.176875	527	0.65875	0.329375	2.2	0.00275	0.001375	3020	3.02	3.775	0.003775	0.0018875
Potatoes
Sweet potato, raw, flesh only	20000	25	23 x extra large	17236	21.545	10.7725	3934	4.9175	2.45875	240	0.3	0.15	60	0.075	0.0375	10	0.0125	0.00625	7660	7.66	9.575	0.009575	0.0047875
Potatoes, old, raw, flesh only	29500	36.875	80 x large whit/red 9-12cm diameter	23630	29.5375	14.7688	5281	6.60125	3.30063	561	0.70125	0.350625	29.5	0.036875	0.0184375	17.6	0.022	0.011	330132	330.132	412.665	0.412665	0.206333
Potatoes, new and salad, flesh only, raw	10000	12.5	238 x average	6658	8.3225	4.16125	1472	1.84	0.92	170	0.2125	0.10625	10	0.0125	0.00625	6	0.0075	0.00375	111909	111.909	139.886	0.139886	0.0699431
Tesco finest roasted parmentier potatoes	15000	18.75	0 x pack	20850	26.0625	13.0312	3660	4.575	2.2875	420	0.525	0.2625	510	0.6375	0.31875	9	0.01125	0.005625	167864	167.864	209.83	0.20983	0.104915
Asda Extra Special Baby Hasselback Potatoes 400g	6000	7.5	60 x (ovenbaked) Per 1/4 pack	8640	10.8	5.4	1260	1.575	0.7875	138	0.1725	0.08625	336	0.42	0.21	4.3	0.005375	0.0026875	2034	2.034	2.5425	0.0025425	0.00127125
			Meal Totals	77014	96.2675	48.1337	15607	19.5087	9.75437	1529	1.91125	0.955625	946	1.1825	0.59125	47	0.05875	0.029375	619598	619.598	774.497	0.774497	0.387249
Wheat & Rye (Bread)
Baps, wholemeal	3520	4.4	32 x bap	7458	9.3225	4.66125	1346	1.6825	0.84125	331	0.41375	0.206875	67	0.08375	0.041875	2.6	0.00325	0.001625	2348	2.348	2.935	0.002935	0.0014675
Blue Dragon Panko Breadcrumbs 120g	500	0.625	4 ¼ x Per pack	1340	1.675	0.8375	235	0.29375	0.146875	38.5	0.048125	0.0240625	27.5	0.034375	0.0171875	0	0	0	0	0	0	0	0
Tortilla, wheat, soft	2880	3.6	43 x large	8042	10.0525	5.02625	1416	1.77	0.885	225	0.28125	0.140625	164	0.205	0.1025	2.8	0.0035	0.00175	0	0	0	0	0
Petit Pain	8080	10.1	65 x demi baguette	20741	25.9262	12.9631	4113	5.14125	2.57063	727	0.90875	0.454375	154	0.1925	0.09625	7.8	0.00975	0.004875	5389	5.389	6.73625	0.00673625	0.00336813
Bagels, plain	2160	2.7	24 x average	5791	7.23875	3.61937	1144	1.43	0.715	216	0.27	0.135	38.9	0.048625	0.0243125	1.6	0.002	0.001	1441	1.441	1.80125	0.00180125	0.000900625
Sainsbury's 6 Plain Folded Flatbreads 210g	100	0.125	0.48 x Per pack	287	0.35875	0.179375	51	0.06375	0.031875	8.5	0.010625	0.0053125	5.3	0.006625	0.0033125	0.097	0.00012125	6.0625e-05	67	0.067	0.08375	8.375e-05	4.1875e-05
Bread, sourdough, white	500	0.625	6 x Average serving	1397	1.74625	0.873125	270	0.3375	0.16875	59	0.07375	0.036875	9.2	0.0115	0.00575	0.4675	0.000584375	0.000292188	516	0.516	0.645	0.000645	0.0003225
Bread, white, average	17600	22	293 x Average Portion	40878	51.0975	25.5487	7857	9.82125	4.91062	1531	1.91375	0.956875	370	0.4625	0.23125	16.5	0.020625	0.0103125	18146	18.146	22.6825	0.0226825	0.0113413
Bread, brown, average	2800	3.5	43 x Average Portion	5710	7.1375	3.56875	1080	1.35	0.675	221	0.27625	0.138125	56	0.07	0.035	2.6	0.00325	0.001625	2887	2.887	3.60875	0.00360875	0.00180437
			Meal Totals	91643	114.554	57.2769	17512	21.89	10.945	3357	4.19625	2.09813	891	1.11375	0.556875	34.5	0.043125	0.0215625	30793	30.793	38.4913	0.0384912	0.0192456
Maize (Meal)
Sweetcorn, kernels, raw	5000	6.25	42 x Large portion	3000	3.75	1.875	378	0.4725	0.23625	170	0.2125	0.10625	90	0.1125	0.05625	8	0.01	0.005	3500	3.5	4.375	0.004375	0.0021875
Sweetcorn, baby, boiled in unsalted water	16000	20	340 x Average Portion	5139	6.42375	3.21188	717	0.89625	0.448125	352	0.44	0.22	96	0.12	0.06	25.7	0.032125	0.0160625	11200	11.2	14	0.014	0.007
			Meal Totals	8139	10.1738	5.08688	1094	1.3675	0.68375	522	0.6525	0.32625	186	0.2325	0.11625	33.7	0.042125	0.0210625	14700	14.7	18.375	0.018375	0.0091875
Palm Oil
			Meal Totals	0	0	0	0	0	0	0	0	0	0	0	0	0	0	0	0	0	0	0	0
Soybean Oil
			Meal Totals	0	0	0	0	0	0	0	0	0	0	0	0	0	0	0	0	0	0	0	0
Olive Oil
Oil, olive	7500	9.375	32 x cup	67433	84.2913	42.1456	0	0	0	0	0	0	7493	9.36625	4.68313	24.5	0.030625	0.0153125	108116	108.116	135.145	0.135145	0.0675725
			Meal Totals	67433	84.2913	42.1456	0	0	0	0	0	0	7493	9.36625	4.68313	24.5	0.030625	0.0153125	108116	108.116	135.145	0.135145	0.0675725
Rapeseed Oil
			Meal Totals	0	0	0	0	0	0	0	0	0	0	0	0	0	0	0	0	0	0	0	0
Sunflower Oil
Oil, sunflower	6000	7.5	26 x cup	53946	67.4325	33.7163	0	0	0	0	0	0	5994	7.4925	3.74625	5.4	0.00675	0.003375	40752	40.752	50.94	0.05094	0.02547
			Meal Totals	53946	67.4325	33.7163	0	0	0	0	0	0	5994	7.4925	3.74625	5.4	0.00675	0.003375	40752	40.752	50.94	0.05094	0.02547
Other Oils						0			0			0			0			0					0
Oil, sesame	250	0.3125	20 x tablespoon	2245	2.80625	1.40312	0	0	0	0.5	0.000625	0.0003125	249	0.31125	0.155625	0.541	0.00067625	0.000338125	5448	5.448	6.81	0.00681	0.003405
			Meal Totals	2245	2.80625	1.40312	0	0	0	0.5	0.000625	0.0003125	249	0.31125	0.155625	0.541	0.00067625	0.000338125	5448	5.448	6.81	0.00681	0.003405
Tomatoes
Tomato puree	1600	2	8 x average tube	1136	1.42	0.71	206	0.2575	0.12875	70	0.0875	0.04375	3.2	0.004	0.002	1.5	0.001875	0.0009375	427	0.427	0.53375	0.00053375	0.000266875
Tomatoes, sun dried without oil	500	0.625	9 ¼ x cup	1286	1.6075	0.80375	218	0.2725	0.13625	71	0.08875	0.044375	14.9	0.018625	0.0093125	0.48	0.0006	0.0003	357	0.357	0.44625	0.00044625	0.000223125
Passata, plain	24000	30	48 x average jar	8112	10.14	5.07	1440	1.8	0.9	480	0.6	0.3	48	0.06	0.03	37	0.04625	0.023125	0	0	0	0	0
Tomatoes, standard, raw	3000	3.75	10 ¾ x large/beef	447	0.55875	0.279375	90	0.1125	0.05625	15	0.01875	0.009375	3	0.00375	0.001875	0.462	0.0005775	0.00028875	2139	2.139	2.67375	0.00267375	0.00133687
Tomatoes, canned, whole contents	12500	15.625	31 x can	2563	3.20375	1.60187	475	0.59375	0.296875	138	0.1725	0.08625	12.5	0.015625	0.0078125	1.9	0.002375	0.0011875	8913	8.913	11.1412	0.0111413	0.00557063
Plum Tomatoes	2500	3.125	9 x large/beef	340	0.425	0.2125	73	0.09125	0.045625	12.5	0.015625	0.0078125	0	0	0	0.385	0.00048125	0.000240625	1783	1.783	2.22875	0.00222875	0.00111437
			Meal Totals	13883	17.3538	8.67688	2501	3.12625	1.56313	786	0.9825	0.49125	82	0.1025	0.05125	42	0.0525	0.02625	13618	13.618	17.0225	0.0170225	0.00851125
Brassicas
Pak choi, steamed	1750	2.1875	11 x cup, shredded/chopped	251	0.31375	0.156875	32.6	0.04075	0.020375	26.3	0.032875	0.0164375	1.8	0.00225	0.001125	1.3	0.001625	0.0008125	0	0	0	0	0
Radish, red, flesh and skin, raw	150	0.1875	15 x piece/slice	18	0.0225	0.01125	2.1	0.002625	0.0013125	1.1	0.001375	0.0006875	0.6	0.00075	0.000375	0.0225	2.8125e-05	1.40625e-05	118	0.118	0.1475	0.0001475	7.375e-05
Cabbage, kimchi	400	0.5	2 x cup	74	0.0925	0.04625	9.6	0.012	0.006	4.4	0.0055	0.00275	2	0.0025	0.00125	0.092	0.000115	5.75e-05	112	0.112	0.14	0.00014	7e-05
Cabbage, average, raw	2000	2.5	2 ¼ x head	531	0.66375	0.331875	88	0.11	0.055	36	0.045	0.0225	4	0.005	0.0025	0.46	0.000575	0.0002875	560	0.56	0.7	0.0007	0.00035
Cabbage, Savoy, raw	2800	3.5	3 x head & 2 ½ x Average Portion	798	0.9975	0.49875	109	0.13625	0.068125	59	0.07375	0.036875	14	0.0175	0.00875	0.0766	9.575e-05	4.7875e-05	4413	4.413	5.51625	0.00551625	0.00275813
Cauliflower, raw	4500	5.625	39 x cup	1377	1.72125	0.860625	191	0.23875	0.119375	113	0.14125	0.070625	18	0.0225	0.01125	1.4	0.00175	0.000875	1283	1.283	1.60375	0.00160375	0.000801875
Curly kale, raw	3500	4.375	194 x cup, 1 inch pieces, loosely packed	1175	1.46875	0.734375	49	0.06125	0.030625	119	0.14875	0.074375	56	0.07	0.035	5.1	0.006375	0.0031875	0	0	0	0	0
Broccolini	36000	45	379 x cup, chopped	12600	15.75	7.875	1116	1.395	0.6975	1548	1.935	0.9675	216	0.27	0.135	21.6	0.027	0.0135	11700	11.7	14.625	0.014625	0.0073125
Broccoli, green, raw	48000	60	505 x cup, chopped	16762	20.9525	10.4763	1478	1.8475	0.92375	2064	2.58	1.29	288	0.36	0.18	28.8	0.036	0.018	15600	15.6	19.5	0.0195	0.00975
			Meal Totals	33585	41.9813	20.9906	3076	3.845	1.9225	3970	4.9625	2.48125	600	0.75	0.375	59	0.07375	0.036875	33785	33.785	42.2313	0.0422313	0.0211156
Onions & Leeks
Onions, raw	8000	10	33 x large	2869	3.58625	1.79313	619	0.77375	0.386875	80	0.1	0.05	8	0.01	0.005	6.1	0.007625	0.0038125	2322	2.322	2.9025	0.0029025	0.00145125
Spring onions, bulbs and tops, raw	800	1	73 x Average Portion	195	0.24375	0.121875	23.8	0.02975	0.014875	16	0.02	0.01	4	0.005	0.0025	0.608	0.00076	0.00038	232	0.232	0.29	0.00029	0.000145
Onions, red, raw	9000	11.25	49 x large onion	3137	3.92125	1.96063	666	0.8325	0.41625	90	0.1125	0.05625	12.6	0.01575	0.007875	6.8	0.0085	0.00425	2612	2.612	3.265	0.003265	0.0016325
Leeks, raw	4000	5	45 x leek	962	1.2025	0.60125	162	0.2025	0.10125	60	0.075	0.0375	8	0.01	0.005	2.8	0.0035	0.00175	1356	1.356	1.695	0.001695	0.0008475
			Meal Totals	7163	8.95375	4.47687	1471	1.83875	0.919375	246	0.3075	0.15375	32.6	0.04075	0.020375	16.4	0.0205	0.01025	6522	6.522	8.1525	0.0081525	0.00407625
Root Vegetables
Beetroot, raw	6500	8.125	83 x beet	2380	2.975	1.4875	470	0.5875	0.29375	111	0.13875	0.069375	6.5	0.008125	0.0040625	1.6	0.002	0.001	0	0	0	0	0
Parsnip, raw	5000	6.25	29 x Large Portion (Average)	3191	3.98875	1.99438	584	0.73	0.365	90	0.1125	0.05625	55	0.06875	0.034375	1.5	0.001875	0.0009375	0	0	0	0	0
Ginger, fresh	500	0.625	100 x thumb (2cm)	222	0.2775	0.13875	37.6	0.047	0.0235	9	0.01125	0.005625	4	0.005	0.0025	0.44	0.00055	0.000275	829	0.829	1.03625	0.00103625	0.000518125
Garlic, raw	750	0.9375	39 ½ x jumbo clove	726	0.9075	0.45375	112	0.14	0.07	59	0.07375	0.036875	4.5	0.005625	0.0028125	0.4275	0.000534375	0.000267188	442	0.442	0.5525	0.0005525	0.00027625
Carrots, old, raw	40000	50	308 x cup, chopped	13968	17.46	8.73	2932	3.665	1.8325	200	0.25	0.125	160	0.2	0.1	51	0.06375	0.031875	7800	7.8	9.75	0.00975	0.004875
			Meal Totals	20487	25.6088	12.8044	4136	5.17	2.585	469	0.58625	0.293125	230	0.2875	0.14375	55	0.06875	0.034375	9070	9.07	11.3375	0.0113375	0.00566875
Other Vegetables
Bamboo shoots, canned, drained	150	0.1875	1.15 x 1 cup (1/8	15.9	0.019875	0.0099375	1.1	0.001375	0.0006875	2.3	0.002875	0.0014375	0.3	0.000375	0.0001875	0.3436	0.0004295	0.00021475	51	0.051	0.06375	6.375e-05	3.1875e-05
Seaweed, nori, dried, raw	200	0.25	67 x snack pack	273	0.34125	0.170625	0	0	0	61	0.07625	0.038125	3	0.00375	0.001875	0.136	0.00017	8.5e-05	68	0.068	0.085	8.5e-05	4.25e-05
Swede, flesh only, raw	1656	2.07	6 x medium swede	421	0.52625	0.263125	82	0.1025	0.05125	11.6	0.0145	0.00725	5	0.00625	0.003125	0.4802	0.00060025	0.000300125	0	0	0	0	0
Beansprouts, mung, raw	1600	2	15 x cup	503	0.62875	0.314375	61	0.07625	0.038125	46	0.0575	0.02875	8	0.01	0.005	4.1	0.005125	0.0025625	9398	9.398	11.7475	0.0117475	0.00587375
Vegetable stock, homemade	400	0.5	1.6 x 1 cup	34.3	0.042875	0.0214375	6.9	0.008625	0.0043125	1.1	0.001375	0.0006875	0.3033	0.000379125	0.000189563	0.72	0.0009	0.00045	0	0	0	0	0
Spinach, baby, raw	800	1	10 x NHS Serving (1 cereal bowl)	132	0.165	0.0825	1.5	0.001875	0.0009375	20.8	0.026	0.013	4.8	0.006	0.003	0.272	0.00034	0.00017	234	0.234	0.2925	0.0002925	0.00014625
Peppers, bell, raw, mixed	3600	4.5	30 x Average Portion	932	1.165	0.5825	173	0.21625	0.108125	36	0.045	0.0225	10.8	0.0135	0.00675	2.4	0.003	0.0015	26514	26.514	33.1425	0.0331425	0.0165712
Waitrose 1 Padron Peppers	1500	1.875		297	0.37125	0.185625	10.5	0.013125	0.0065625	44	0.055	0.0275	9	0.01125	0.005625	0	0	0	0	0	0	0	0
Lettuce, average, raw	770	0.9625	11 ½ x cup, chopped	87	0.10875	0.054375	10.8	0.0135	0.00675	9.2	0.0115	0.00575	0.77	0.0009625	0.00048125	2.1	0.002625	0.0013125	182	0.182	0.2275	0.0002275	0.00011375
Courgette, raw	5000	6.25	63 x Medium portion / NHS Serving	808	1.01	0.505	115	0.14375	0.071875	65	0.08125	0.040625	10	0.0125	0.00625	8.9	0.011125	0.0055625	1680	1.68	2.1	0.0021	0.00105
Celery, raw	180	0.225	2 x NHS Serving	15.3	0.019125	0.0095625	2.5	0.003125	0.0015625	0.9	0.001125	0.0005625	0.18	0.000225	0.0001125	0.0324	4.05e-05	2.025e-05	0	0	0	0	0
Squash, butternut, raw	15000	18.75	107 x cup cubes	5307	6.63375	3.31688	1128	1.41	0.705	165	0.20625	0.103125	15	0.01875	0.009375	3.8	0.00475	0.002375	5040	5.04	6.3	0.0063	0.00315
Beans, green, raw	4500	5.625	64 x NHS Serving (4 tablespoons/1/2 cup)	1100	1.375	0.6875	140	0.175	0.0875	95	0.11875	0.059375	18	0.0225	0.01125	2.3	0.002875	0.0014375	2322	2.322	2.9025	0.0029025	0.00145125
			Meal Totals	3519	4.39875	2.19937	465	0.58125	0.290625	298	0.3725	0.18625	52	0.065	0.0325	25.5842	0.0319803	0.0159901	45489	45.489	56.8612	0.0568612	0.0284306
Berries
Mixed berries, frozen	4000	5	29 x cup	1200	1.5	0.75	248	0.31	0.155	34	0.0425	0.02125	8	0.01	0.005	3.6	0.0045	0.00225	3864	3.864	4.83	0.00483	0.002415
Raspberries, raw	1750	2.1875	27 x Half cup	460	0.575	0.2875	89	0.11125	0.055625	14	0.0175	0.00875	5.3	0.006625	0.0033125	1.5	0.001875	0.0009375	723	0.723	0.90375	0.00090375	0.000451875
Strawberries, raw	3500	4.375	14 x cup, puree	1096	1.37	0.685	214	0.2675	0.13375	21	0.02625	0.013125	17.5	0.021875	0.0109375	6	0.0075	0.00375	1215	1.215	1.51875	0.00151875	0.000759375
Blueberries	1125	1.40625	47 x Average Portion	470	0.5875	0.29375	102	0.1275	0.06375	10.1	0.012625	0.0063125	2.3	0.002875	0.0014375	0.8775	0.00109687	0.000548437	951	0.951	1.18875	0.00118875	0.000594375
Blackberries, raw	1000	1.25	198 x blackberries	286	0.3575	0.17875	56	0.07	0.035	11	0.01375	0.006875	2	0.0025	0.00125	0.42	0.000525	0.0002625	413	0.413	0.51625	0.00051625	0.000258125
			Meal Totals	9919	12.3987	6.19937	1977	2.47125	1.23562	350	0.4375	0.21875	68	0.085	0.0425	12.3975	0.0154969	0.00774844	7166	7.166	8.9575	0.0089575	0.00447875
Bananas						0			0			0			0			0
Bananas, flesh only	6000	7.5	50 x Large	5135	6.41875	3.20938	1200	1.5	0.75	72	0.09	0.045	6	0.0075	0.00375	5.4	0.00675	0.003375	4740	4.74	5.925	0.005925	0.0029625
			Meal Totals	5135	6.41875	3.20938	1200	1.5	0.75	72	0.09	0.045	6	0.0075	0.00375	5.4	0.00675	0.003375	4740	4.74	5.925	0.005925	0.0029625
Apples
Apple juice, fresh	96000	120	320 x Tall tumbler	30662	38.3275	19.1638	7392	9.24	4.62	58	0.0725	0.03625	96	0.12	0.06	273	0.34125	0.170625	25632	25.632	32.04	0.03204	0.01602
Apples, eating, raw, flesh and skin	13050	16.3125	57 x Large	6888	8.61	4.305	1497	1.87125	0.935625	78	0.0975	0.04875	65	0.08125	0.040625	3.8	0.00475	0.002375	50040	50.04	62.55	0.06255	0.031275
			Meal Totals	37550	46.9375	23.4688	8889	11.1113	5.55563	136	0.17	0.085	161	0.20125	0.100625	276	0.345	0.1725	75672	75.672	94.59	0.09459	0.047295
Citrus
Orange juice, from concentrate	14000	17.5	47 x Tall tumbler	5180	6.475	3.2375	1229	1.53625	0.768125	81	0.10125	0.050625	14	0.0175	0.00875	6.4	0.008	0.004	14266	14.266	17.8325	0.0178325	0.00891625
Limes, flesh only	196	0.245	4 x all sizes fruit	17.1	0.021375	0.0106875	1.6	0.002	0.001	1.4	0.00175	0.000875	0.588	0.000735	0.0003675	0.051	6.375e-05	3.1875e-05	126	0.126	0.1575	0.0001575	7.875e-05
Lemons, whole, without pips	780	0.975	6 x Average lemon	151	0.18875	0.094375	24.8	0.031	0.0155	7.8	0.00975	0.004875	2.3	0.002875	0.0014375	0.2028	0.0002535	0.00012675	501	0.501	0.62625	0.00062625	0.000313125
Citrus fruit, soft/easy peelers, flesh only	1920	2.4	24 x Large	803	1.00375	0.501875	179	0.22375	0.111875	13.4	0.01675	0.008375	3.8	0.00475	0.002375	0.7222	0.00090275	0.000451375	4375	4.375	5.46875	0.00546875	0.00273437
Oranges, flesh only	3200	4	13 x large/extra large fruit	1185	1.48125	0.740625	256	0.32	0.16	25.6	0.032	0.016	6.4	0.008	0.004	1.1	0.001375	0.0006875	2093	2.093	2.61625	0.00261625	0.00130813
			Meal Totals	7337	9.17125	4.58563	1691	2.11375	1.05688	129	0.16125	0.080625	27.2	0.034	0.017	8.5	0.010625	0.0053125	21360	21.36	26.7	0.0267	0.01335
Other Fruits
Blue Dragon Creamed Coconut Block 200g	1000	1.25	5 x Per pack	6820	8.525	4.2625	95	0.11875	0.059375	80	0.1	0.05	680	0.85	0.425	1.8	0.00225	0.001125	0	0	0	0	0
Coconut milk, canned	3200	4	8 x average can	5760	7.2	3.6	109	0.13625	0.068125	35.2	0.044	0.022	576	0.72	0.36	3.2	0.004	0.002	12042	12.042	15.0525	0.0150525	0.00752625
Kalamata Olives	1000	1.25	67 x average serving	2163	2.70375	1.35187	48	0.06	0.03	18	0.0225	0.01125	211	0.26375	0.131875	0.63	0.0007875	0.00039375	3015	3.015	3.76875	0.00376875	0.00188437
Melon, watermelon, flesh only	4000	5	16 x Average slice	1298	1.6225	0.81125	278	0.3475	0.17375	20	0.025	0.0125	12	0.015	0.0075	5.4	0.00675	0.003375	940	0.94	1.175	0.001175	0.0005875
Plums, dessert, flesh and skin, raw	3000	3.75	21 x cup, chopped	1313	1.64125	0.820625	290	0.3625	0.18125	18	0.0225	0.01125	9	0.01125	0.005625	0.78	0.000975	0.0004875	6540	6.54	8.175	0.008175	0.0040875
Pears, raw, flesh and skin	2400	3	13 x large	1091	1.36375	0.681875	260	0.325	0.1625	7.2	0.009	0.0045	2.4	0.003	0.0015	1.8	0.00225	0.001125	2213	2.213	2.76625	0.00276625	0.00138313
Pineapple, flesh only, raw	6000	7.5	6 x total fruit (flesh only)	2850	3.5625	1.78125	669	0.83625	0.418125	30	0.0375	0.01875	6	0.0075	0.00375	8	0.01	0.005	1530	1.53	1.9125	0.0019125	0.00095625
Mangoes, ripe, flesh only, raw	1500	1.875	9 x cup (cubes)	746	0.9325	0.46625	156	0.195	0.0975	10.5	0.013125	0.0065625	9	0.01125	0.005625	0.465	0.00058125	0.000290625	2700	2.7	3.375	0.003375	0.0016875
Melon, Canteloupe-type, flesh only	4500	5.625	35 x Average slice	905	1.13125	0.565625	189	0.23625	0.118125	27	0.03375	0.016875	4.5	0.005625	0.0028125	1.1	0.001375	0.0006875	4347	4.347	5.43375	0.00543375	0.00271688
Grapes, average	1500	1.875	15 x Small bunch	1035	1.29375	0.646875	242	0.3025	0.15125	10.5	0.013125	0.0065625	3	0.00375	0.001875	0.555	0.00069375	0.000346875	912	0.912	1.14	0.00114	0.00057
Kiwi fruit, flesh only, raw	720	0.9	12 x medium	328	0.41	0.205	62	0.0775	0.03875	5.8	0.00725	0.003625	6.5	0.008125	0.0040625	0.2708	0.0003385	0.00016925	370	0.37	0.4625	0.0004625	0.00023125
Cucumber, raw, flesh and skin	2400	3	0 x cup slices	341	0.42625	0.213125	28.8	0.036	0.018	24	0.03	0.015	14.4	0.018	0.009	0.552	0.00069	0.000345	847	0.847	1.05875	0.00105875	0.000529375
Avocado, Hass, flesh only, weighed with skin and stone	4480	5.6	19 x Cup, Puree	5288	6.61	3.305	54	0.0675	0.03375	58	0.0725	0.03625	538	0.6725	0.33625	6	0.0075	0.00375	8875	8.875	11.0938	0.0110937	0.00554687
			Meal Totals	29939	37.4237	18.7119	2480	3.1	1.55	344	0.43	0.215	2071	2.58875	1.29438	30.5	0.038125	0.0190625	44331	44.331	55.4138	0.0554137	0.0277069
Cane Sugar
Sugar, white	1500	1.875	7 x cup	6000	7.5	3.75	1500	1.875	0.9375	0	0	0	0	0	0	1.4	0.00175	0.000875	1339	1.339	1.67375	0.00167375	0.000836875
Sugar, icing	100	0.125	1 x cup (sieved)	399	0.49875	0.249375	100	0.125	0.0625	0	0	0	0	0	0	0.032	4e-05	2e-05	89	0.089	0.11125	0.00011125	5.5625e-05
Sugar, brown	2400	3	10 x cup packed	9272	11.59	5.795	2316	2.895	1.4475	2.4	0.003	0.0015	0	0	0	0.768	0.00096	0.00048	2142	2.142	2.6775	0.0026775	0.00133875
			Meal Totals	15671	19.5888	9.79438	3915	4.89375	2.44687	2.4	0.003	0.0015	0	0	0	2.2	0.00275	0.001375	3570	3.57	4.4625	0.0044625	0.00223125
Beet Sugar
			Meal Totals	0	0	0	0	0	0	0	0	0	0	0	0	0	0	0	0	0	0	0	0
Beer (5% ABV)
			Meal Totals	0	0	0	0	0	0	0	0	0	0	0	0	0	0	0	0	0	0	0	0
Wine (12.5% ABV)
			Meal Totals	0	0	0	0	0	0	0	0	0	0	0	0	0	0	0	0	0	0	0	0
Dark Chocolate
			Meal Totals	0	0	0	0	0	0	0	0	0	0	0	0	0	0	0	0	0	0	0	0
Coffee
NESCAFÉ GOLD Black Instant Coffee 200g	1350	1.6875	6 ¾ x Per pack	679	0.84875	0.424375	41	0.05125	0.025625	108	0.135	0.0675	9.5	0.011875	0.0059375	16	0.02	0.01	0	0	0	0	0
NESCAFÉ GOLD Cappuccino Decaf Unsweetened Taste Coffee, 8 Sachets x 14.2g	533	0.66625	4 ½ x Per pack	131	0.16375	0.081875	17.6	0.022	0.011	4.3	0.005375	0.0026875	4.8	0.006	0.003	6.3	0.007875	0.0039375	0	0	0	0	0
			Meal Totals	810	1.0125	0.50625	58	0.0725	0.03625	112	0.14	0.07	14.2	0.01775	0.008875	22.3	0.027875	0.0139375	0	0	0	0	0
Herbs
Parsley, fresh	175	0.21875	175 x sprigs	60	0.075	0.0375	4.7	0.005875	0.0029375	5.3	0.006625	0.0033125	2.3	0.002875	0.0014375	0.1669	0.000208625	0.000104312	0	0	0	0	0
Dill, fresh	15	0.01875	4 x tbsp	3.8	0.00475	0.002375	0.132	0.000165	8.25e-05	0.555	0.00069375	0.000346875	0.12	0.00015	7.5e-05	0.0143	1.7875e-05	8.9375e-06	0	0	0	0	0
Coriander leaves, fresh	75	0.09375	19 x Average Portion	13.2	0.0165	0.00825	0.8775	0.00109687	0.000548437	1.6	0.002	0.001	0.375	0.00046875	0.000234375	0.0918	0.00011475	5.7375e-05	621	0.621	0.77625	0.00077625	0.000388125
Chives, fresh	60	0.075	20 x tablespoon	16.3	0.020375	0.0101875	1.1	0.001375	0.0006875	2	0.0025	0.00125	0.42	0.000525	0.0002625	0.0609	7.6125e-05	3.80625e-05	0	0	0	0	0
			Meal Totals	93	0.11625	0.058125	6.8	0.0085	0.00425	9.4	0.01175	0.005875	3.2	0.004	0.002	0.3338	0.00041725	0.000208625	621	0.621	0.77625	0.00077625	0.000388125
Funghi
Mushrooms, white, raw	1500	1.875	21 x cup, pieces	105	0.13125	0.065625	4.5	0.005625	0.0028125	15	0.01875	0.009375	3	0.00375	0.001875	0.405	0.00050625	0.000253125	918	0.918	1.1475	0.0011475	0.00057375
			Meal Totals	105	0.13125	0.065625	4.5	0.005625	0.0028125	15	0.01875	0.009375	3	0.00375	0.001875	0.405	0.00050625	0.000253125	918	0.918	1.1475	0.0011475	0.00057375
Spices
Cinnamon Sticks, Ceylon	100	0.125	50 x Per average stick	338	0.4225	0.21125	80	0.1	0.05	0	0	0	2	0.0025	0.00125	0.1014	0.00012675	6.3375e-05	0	0	0	0	0
Cloves, dried	50	0.0625	0.28 x 1 cup	190	0.2375	0.11875	29.9	0.037375	0.0186875	3	0.00375	0.001875	6.5	0.008125	0.0040625	0.0332	4.15e-05	2.075e-05	3060	3.06	3.825	0.003825	0.0019125
Chilli flakes	150	0.1875	25 x tablespoon	494	0.6175	0.30875	48	0.06	0.03	18	0.0225	0.01125	25.5	0.031875	0.0159375	0.1521	0.000190125	9.50625e-05	0	0	0	0	0
Cumin seeds	25	0.03125	12 ½ x teaspoon	70	0.0875	0.04375	0.575	0.00071875	0.000359375	4.5	0.005625	0.0028125	5.6	0.007	0.0035	0.0254	3.175e-05	1.5875e-05	0	0	0	0	0
Garam masala	100	0.125	17 x tablespoon	362	0.4525	0.22625	41	0.05125	0.025625	15.6	0.0195	0.00975	15.1	0.018875	0.0094375	0.1014	0.00012675	6.3375e-05	0	0	0	0	0
Seasoning spice pack, retail (eg. fajitas)	500	0.625	14 x average pack	1429	1.78625	0.893125	295	0.36875	0.184375	37.5	0.046875	0.0234375	11	0.01375	0.006875	0.5071	0.000633875	0.000316937	0	0	0	0	0
Cajun spice mix	150	0.1875	18 ½ x tablespoon	306	0.3825	0.19125	42	0.0525	0.02625	14.6	0.01825	0.009125	8.7	0.010875	0.0054375	0.1324	0.0001655	8.275e-05	0	0	0	0	0
Chinese 5 spice	150	0.1875	25 x tablespoon	186	0.2325	0.11625	2.9	0.003625	0.0018125	14.3	0.017875	0.0089375	13.1	0.016375	0.0081875	0.1324	0.0001655	8.275e-05	0	0	0	0	0
Chilli powder	50	0.0625	19 x teaspoon	106	0.1325	0.06625	3.6	0.0045	0.00225	6.8	0.0085	0.00425	7.2	0.009	0.0045	0.041	5.125e-05	2.5625e-05	113	0.113	0.14125	0.00014125	7.0625e-05
Cinnamon, ground	50	0.0625	7 ¼ x tablespoon	17.8	0.02225	0.011125	1.1	0.001375	0.0006875	2	0.0025	0.00125	0.6	0.00075	0.000375	0.0507	6.3375e-05	3.16875e-05	0	0	0	0	0
Paprika	250	0.3125	37 x tablespoon	534	0.6675	0.33375	25.7	0.032125	0.0160625	35.3	0.044125	0.0220625	32.3	0.040375	0.0201875	0.2879	0.000359875	0.000179938	0	0	0	0	0
Star Anise	30	0.0375		109	0.13625	0.068125	11.3	0.014125	0.0070625	5.3	0.006625	0.0033125	4.8	0.006	0.003	0	0	0	0	0	0	0	0
Garlic powder	50	0.0625	16 x teaspoon	121	0.15125	0.075625	19.6	0.0245	0.01225	9.4	0.01175	0.005875	0.6	0.00075	0.000375	0.041	5.125e-05	2.5625e-05	113	0.113	0.14125	0.00014125	7.0625e-05
Pepper, black	550	0.6875	80 x tablespoon	405	0.50625	0.253125	3.3	0.004125	0.0020625	57	0.07125	0.035625	18.2	0.02275	0.011375	0.6334	0.00079175	0.000395875	158	0.158	0.1975	0.0001975	9.875e-05
			Meal Totals	4668	5.835	2.9175	604	0.755	0.3775	223	0.27875	0.139375	151	0.18875	0.094375	2.2	0.00275	0.001375	3445	3.445	4.30625	0.00430625	0.00215313
Condiments
Middleton Foods Waffle Mix 3.5kg	1000	1.25	0.29 x Per pack	3555	4.44375	2.22187	754	0.9425	0.47125	92	0.115	0.0575	19	0.02375	0.011875	2	0.0025	0.00125	1838	1.838	2.2975	0.0022975	0.00114875
Nando's Smokey BBQ Peri-Peri Rub 25g	400	0.5	16 x Per pack	1050	1.3125	0.65625	208	0.26	0.13	16.8	0.021	0.0105	16.8	0.021	0.0105	0.4057	0.000507125	0.000253562	0	0	0	0	0
nandos, peri peri sauce	1000	1.25	50 x serving	697	0.87125	0.435625	86	0.1075	0.05375	5	0.00625	0.003125	37	0.04625	0.023125	1.5	0.001875	0.0009375	613	0.613	0.76625	0.00076625	0.000383125
Barbecue sauce	2000	2.5	10 x On 16	2941	3.67625	1.83813	711	0.88875	0.444375	20	0.025	0.0125	2	0.0025	0.00125	3.1	0.003875	0.0019375	1226	1.226	1.5325	0.0015325	0.00076625
Honey, raw	2000	2.5	6 x cup	6436	8.045	4.0225	1600	2	1	9	0.01125	0.005625	0	0	0	3.5	0.004375	0.0021875	1785	1.785	2.23125	0.00223125	0.00111563
Pesto, red	250	0.3125	15 x Average Portion	797	0.99625	0.498125	14.6	0.01825	0.009125	12.5	0.015625	0.0078125	77	0.09625	0.048125	0.6775	0.000846875	0.000423437	525	0.525	0.65625	0.00065625	0.000328125
Pesto, green	750	0.9375	31 x tablespoon	3149	3.93625	1.96812	28.1	0.035125	0.0175625	42	0.0525	0.02625	319	0.39875	0.199375	2	0.0025	0.00125	1574	1.574	1.9675	0.0019675	0.00098375
Waitrose Cooks' Ingredients Thai Red Curry Paste 190g	150	0.1875	0.79 x Per pack	152	0.19	0.095	16.1	0.020125	0.0100625	2.6	0.00325	0.001625	8.6	0.01075	0.005375	0.27	0.0003375	0.00016875	0	0	0	0	0
Colmans English Mustard	170	0.2125	7 x tablespoon	320	0.4	0.2	22.6	0.02825	0.014125	11.6	0.0145	0.00725	20.4	0.0255	0.01275	0.5996	0.0007495	0.00037475	0	0	0	0	0
Balsamic Glaze, Tesco	200	0.25	13 x tablespoon	462	0.5775	0.28875	114	0.1425	0.07125	1	0.00125	0.000625	0	0	0	0.308	0.000385	0.0001925	0	0	0	0	0
Mustard, wholegrain	400	0.5	13 x tablespoon	565	0.70625	0.353125	16.7	0.020875	0.0104375	32.8	0.041	0.0205	41	0.05125	0.025625	0.72	0.0009	0.00045	0	0	0	0	0
Worcestershire sauce	75	0.09375	12 ½ x teaspoon	69	0.08625	0.043125	16.1	0.020125	0.0100625	1.1	0.001375	0.0006875	0.075	9.375e-05	4.6875e-05	0.1155	0.000144375	7.21875e-05	46	0.046	0.0575	5.75e-05	2.875e-05
Kikkoman, Teriyaki Sauce	1000	1.25	67 x tablespoon (serving)	953	1.19125	0.595625	225	0.28125	0.140625	15.6	0.0195	0.00975	0.2441	0.000305125	0.000152563	1.5	0.001875	0.0009375	613	0.613	0.76625	0.00076625	0.000383125
Oyster sauce	750	0.9375	38 x Average Portion	124	0.155	0.0775	0	0	0	29.3	0.036625	0.0183125	0.75	0.0009375	0.00046875	1.2	0.0015	0.00075	460	0.46	0.575	0.000575	0.0002875
Maggi Béchamel Sauce 2kg	8000	10	4 x Per pack	35184	43.98	21.99	5096	6.37	3.185	640	0.8	0.4	1360	1.7	0.85	14.4	0.018	0.009	0	0	0	0	0
Schwartz Chicken Seasoning 720g	200	0.25	0.28 x Per pack	137	0.17125	0.085625	10.4	0.013	0.0065	8.2	0.01025	0.005125	7	0.00875	0.004375	0.308	0.000385	0.0001925	0	0	0	0	0
Satay sauce	1000	1.25	7 x Average per meal	2659	3.32375	1.66187	126	0.1575	0.07875	98	0.1225	0.06125	198	0.2475	0.12375	0.945	0.00118125	0.000590625	2205	2.205	2.75625	0.00275625	0.00137813
Sriracha Chilli Sauce	1250	1.5625	63 x tablespoon	1188	1.485	0.7425	281	0.35125	0.175625	12.1	0.015125	0.0075625	1.7	0.002125	0.0010625	1.9	0.002375	0.0011875	766	0.766	0.9575	0.0009575	0.00047875
Syrup, maple	200	0.25	10 x tablespoon	468	0.585	0.2925	116	0.145	0.0725	0	0	0	0.4	0.0005	0.00025	0.1518	0.00018975	9.4875e-05	179	0.179	0.22375	0.00022375	0.000111875
Vinegar	500	0.625	44 x tablespoon	20	0.025	0.0125	3	0.00375	0.001875	2	0.0025	0.00125	0	0	0	0.5608	0.000701	0.0003505	0	0	0	0	0
Sainsbury's White Wine Vinegar 500ml	400	0.5	27 x Per 15ml serving	35.6	0.0445	0.02225	2.4	0.003	0.0015	2	0.0025	0.00125	2	0.0025	0.00125	0.4487	0.000560875	0.000280437	0	0	0	0	0
Wine vinegar	200	0.25	17 ½ x tablespoon	4	0.005	0.0025	1	0.00125	0.000625	0	0	0	0	0	0	0.2243	0.000280375	0.000140188	0	0	0	0	0
Dressing, French	500	0.625	33 x tablespoon	1680	2.1	1.05	56	0.07	0.035	1.5	0.001875	0.0009375	161	0.20125	0.100625	0.77	0.0009625	0.00048125	0	0	0	0	0
Soy sauce, light and dark varieties	1200	1.5	67 x tablespoon	975	1.21875	0.609375	208	0.26	0.13	36	0.045	0.0225	0	0	0	1.8	0.00225	0.001125	736	0.736	0.92	0.00092	0.00046
Brown sauce	638	0.7975	27 x tablespoon	729	0.91125	0.455625	173	0.21625	0.108125	7.7	0.009625	0.0048125	0.638	0.0007975	0.00039875	0.9825	0.00122813	0.000614063	391	0.391	0.48875	0.00048875	0.000244375
Hellmanns, Light Mayonnaise	2120	2.65	64 x heaped tablespoon	5962	7.4525	3.72625	138	0.1725	0.08625	29.6	0.037	0.0185	583	0.72875	0.364375	4.3	0.005375	0.0026875	0	0	0	0	0
Rock Salt, pink	200	0.25	25 x heaped teaspoon	0	0	0	0	0	0	0	0	0	0	0	0	0.1292	0.0001615	8.075e-05	0	0	0	0	0
Salt	650	0.8125	81 x heaped teaspoon	0	0	0	0	0	0	0	0	0	0	0	0	0.4199	0.000524875	0.000262437	0	0	0	0	0
Jam, fruit with no seeds	1200	1.5	60 x Individual carton	3163	3.95375	1.97687	787	0.98375	0.491875	3.6	0.0045	0.00225	0	0	0	1.7	0.002125	0.0010625	1071	1.071	1.33875	0.00133875	0.000669375
Mayonnaise, standard, retail	1188	1.485	36 x heaped tablespoon	8160	10.2	5.1	27.6	0.0345	0.01725	13.1	0.016375	0.0081875	889	1.11125	0.555625	2.4	0.003	0.0015	0	0	0	0	0
Tomato ketchup	1140	1.425	48 x tablespoon	1350	1.6875	0.84375	317	0.39625	0.198125	18.2	0.02275	0.011375	1.1	0.001375	0.0006875	1.7	0.002125	0.0010625	609	0.609	0.76125	0.00076125	0.000380625
Sweet chilli sauce	5200	6.5	260 x tablespoon	12740	15.925	7.9625	2990	3.7375	1.86875	78	0.0975	0.04875	52	0.065	0.0325	4	0.005	0.0025	3188	3.188	3.985	0.003985	0.0019925
Vanilla essence, no alcohol	500	0.625	33 x tablespoon	0.6	0.00075	0.000375	0	0	0	0.15	0.0001875	9.375e-05	0	0	0	2.2	0.00275	0.001375	63253	63.253	79.0662	0.0790662	0.0395331
Sea Salt	7000	8.75	875 x heaped teaspoon	0	0	0	0	0	0	0	0	0	0	0	0	4.5	0.005625	0.0028125	0	0	0	0	0
Nutella® Hazelnut Spread with Cocoa 750g	3600	4.5	4 ¾ x Per pack	19199	23.9988	11.9994	2070	2.5875	1.29375	227	0.28375	0.141875	1112	1.39	0.695	1.2	0.0015	0.00075	3213	3.213	4.01625	0.00401625	0.00200813
			Meal Totals	114925	143.656	71.8281	16216	20.27	10.135	1468	1.835	0.9175	4908	6.135	3.0675	63	0.07875	0.039375	84289	84.289	105.361	0.105361	0.0526806
Confectionary
Kellogg's Rice Krispies Squares Marshmallow 4 x 28g	952	1.19	8 ½ x Per pack	4036	5.045	2.5225	724	0.905	0.4525	28.6	0.03575	0.017875	114	0.1425	0.07125	3.4	0.00425	0.002125	0	0	0	0	0
Brownies, homemade	3900	4.875	60 x average	19613	24.5162	12.2581	2282	2.8525	1.42625	191	0.23875	0.119375	1080	1.35	0.675	35	0.04375	0.021875	7168	7.168	8.96	0.00896	0.00448
Oreo Original Crumbs Vanilla Biscuit Crumb 400 Gr	250	0.3125	0.63 x Per pack	1159	1.44875	0.724375	170	0.2125	0.10625	12.8	0.016	0.008	48	0.06	0.03	0.255	0.00031875	0.000159375	0	0	0	0	0
Lotus Biscoff Crumb 750g	250	0.3125	10 x 25g	1203	1.50375	0.751875	182	0.2275	0.11375	12.3	0.015375	0.0076875	48	0.06	0.03	0.3825	0.000478125	0.000239063	726	0.726	0.9075	0.0009075	0.00045375
Chocolate, white	600	0.75	12 x regular milky bar	3193	3.99125	1.99562	333	0.41625	0.208125	48	0.06	0.03	185	0.23125	0.115625	4	0.005	0.0025	10318	10.318	12.8975	0.0128975	0.00644875
			Meal Totals	29204	36.505	18.2525	3690	4.6125	2.30625	293	0.36625	0.183125	1475	1.84375	0.921875	43	0.05375	0.026875	18211	18.211	22.7638	0.0227638	0.0113819
Beverages
Tea, green, infusion	350	0.4375	1 ¾ x cup	1.4	0.00175	0.000875	0	0	0	0.35	0.0004375	0.00021875	0	0	0	0.1155	0.000144375	7.21875e-05	3100	3.1	3.875	0.003875	0.0019375
Taylors of Harrogate Yorkshire Tea Biscuit Brew 40 Tea Bags 112g	2128	2.66	19 x Per pack	0	0	0	0	0	0	0	0	0	0	0	0	0.7022	0.00087775	0.000438875	18846	18.846	23.5575	0.0235575	0.0117788
Coca-Cola Zero Sugar 330ml	1980	2.475	6 x Per pack	0	0	0	0	0	0	0	0	0	0	0	0	1.2	0.0015	0.00075	0	0	0	0	0
Coca-Cola Original Taste 330ml	5940	7.425	18 x Per: 330ml	2519	3.14875	1.57438	630	0.7875	0.39375	0	0	0	0	0	0	2.4	0.003	0.0015	0	0	0	0	0
Fanta Orange	3960	4.95		1647	2.05875	1.02937	412	0.515	0.2575	0	0	0	0	0	0	0	0	0	0	0	0	0	0
Tea, fruit, as served	3960	4.95	15 x mug	0	0	0	0	0	0	0	0	0	0	0	0	1.3	0.001625	0.0008125	35070	35.07	43.8375	0.0438375	0.0219188
			Meal Totals	4167	5.20875	2.60438	1041	1.30125	0.650625	0.35	0.0004375	0.00021875	0	0	0	5.7	0.007125	0.0035625	57015	57.015	71.2687	0.0712687	0.0356344
			Plan Total:	1097459	1371.82	685.912	121088	151.36	75.68	53038	66.2975	33.1487	44534	55.6675	27.8337	2231	2.78875	1.39437	3224821	3224.82	4031.03	4.03103	2.01551
			STDEV	10261.4	12.8268	6.41338	1342.23	1.67779	0.838893	924.626	1.15578	0.577891	765.723	0.957154	0.478577	41.8216	0.0522769	0.0261385	63114.2	63.1142	78.8927	0.0788927	0.0394463
			CONFIDENCE NORM	1418.59	1.77324	0.886618	185.557	0.231946	0.115973	127.825	0.159781	0.0798907	105.858	0.132322	0.0661609	5.78163	0.00722704	0.00361352	8725.23	8.72523	10.9065	0.0109065	0.00545327
			CONFIDENCE LOWER	1.09604e+06	1370.05	685.025	120902	151.128	75.564	52910.2	66.1377	33.0689	44428.1	55.5352	27.7676	2225.22	2.78152	1.39076	3.2161e+06	3216.1	4020.12	4.02012	2.01006
			CONFIDENCE UPPER	1.09888e+06	1373.6	686.798	121274	151.592	75.796	53165.8	66.4573	33.2286	44639.9	55.7998	27.8999	2236.78	2.79598	1.39799	3.23355e+06	3233.55	4041.93	4.04193	2.02097

## Sheet: TEAM THREE
Food Name	Quantity (g)	Quantity Per Person (g)	Measure	Energy (kcal)	Calories Per Person per Day (Kcals)	Calories Per Person per Service (Kcals)	Carbohydrate (g)	Carbohydrate Per Person Per Day (g)	Carbohydrate Per Person Per Service (g)	Protein (g)	Protein Per Person Per Day (g)	Protein Per Person Per Service (g)	Fat (g)	Fat Per Person Per Day (g)	Fat Per Person Per Service (g)	Foodprint CO2 (kg.CO2.eq)	Foodprint CO2 Per Person Per Day (kg.CO2.eq)	Foodprint CO2 Per Person Per Service (kg.CO2.eq)	Foodprint Water (L)	Foodprint Water (kL eq)	Foodprint Water Per Person Per Day (L)	Foodprint Water Per Person Per Day (kL eq)	Foodprint Water Per Person Per Service (kL eq)
Beef (Beef Herd)
Stock, beef, homemade	1000	2.63158	4 x cup	345	0.907895	0.453947	34	0.0894737	0.0447368	25.2	0.0663158	0.0331579	12	0.0315789	0.0157895	1.3	0.00342105	0.00171053	0	0	0	0	0
Beef, lean, average, raw	10000	26.3158	43 x Large	12870	33.8684	16.9342	0	0	0	2250	5.92105	2.96053	430	1.13158	0.565789	266	0.7	0.35	264650	264.65	696.447	0.696447	0.348224
Beef, sirloin steak, raw, lean	9000	23.6842	38 x Large	12105	31.8553	15.9276	0	0	0	2115	5.56579	2.78289	405	1.06579	0.532895	190	0.5	0.25	238185	238.185	626.803	0.626803	0.313401
Beef, mince, raw, extra lean	5000	13.1579	21 x Extra large	6270	16.5	8.25	0	0	0	1095	2.88158	1.44079	210	0.552632	0.276316	106	0.278947	0.139474	132325	132.325	348.224	0.348224	0.174112
	25000	65.7895	Meal Totals	31590	83.1316	41.5658	34	0.0894737	0.0447368	5485	14.4342	7.21711	1057	2.78158	1.39079	563	1.48158	0.740789	635160	635.16	1671.47	1.67147	0.835737
Lamb & Mutton
Oxo stock cube, lamb	500	1.31579	85 x stock cube	1464	3.85263	1.92632	252	0.663158	0.331579	70	0.184211	0.0921053	19.5	0.0513158	0.0256579	0.9	0.00236842	0.00118421	0	0	0	0	0
Lamb, breast, raw, lean	10000	26.3158	100 x Average portion	17920	47.1579	23.5789	0	0	0	1960	5.15789	2.57895	1120	2.94737	1.47368	256	0.673684	0.336842	104120	104.12	274	0.274	0.137
	10500	27.6316	Meal Totals	19384	51.0105	25.5053	252	0.663158	0.331579	2030	5.34211	2.67105	1140	3	1.5	257	0.676316	0.338158	104120	104.12	274	0.274	0.137
Beef (Dairy Herd)
			Meal Totals	0	0	0	0	0	0	0	0	0	0	0	0	0	0	0	0	0	0	0	0
Crustaceans (Farmed)
Prawns, king, raw	5000	13.1579	36 x Medium Portion (1 Cup)	3835	10.0921	5.04605	0	0	0	880	2.31579	1.15789	35	0.0921053	0.0460526	39	0.102632	0.0513158	8690	8.69	22.8684	0.0228684	0.0114342
			Meal Totals	3835	10.0921	5.04605	0	0	0	880	2.31579	1.15789	35	0.0921053	0.0460526	39	0.102632	0.0513158	8690	8.69	22.8684	0.0228684	0.0114342
Cheese
Cheese, Feta	900	2.36842	150 x 1cm cubes	2249	5.91842	2.95921	12.9	0.0339474	0.0169737	140	0.368421	0.184211	182	0.478947	0.239474	7.4	0.0194737	0.00973684	8469	8.469	22.2868	0.0222868	0.0111434
Cheese, Cheddar, English	4000	10.5263	100 x Average Portion	16644	43.8	21.9	4	0.0105263	0.00526316	1016	2.67368	1.33684	1396	3.67368	1.83684	35.5	0.0934211	0.0467105	20240	20.24	53.2632	0.0532632	0.0266316
Cheese, Parmesan, fresh	500	1.31579	33 x tablespoon	2078	5.46842	2.73421	4.3	0.0113158	0.00565789	181	0.476316	0.238158	149	0.392105	0.196053	7.7	0.0202632	0.0101316	5100	5.1	13.4211	0.0134211	0.00671053
Cheese, spreadable, soft white, low fat	2000	5.26316	39 x tablespoon	1981	5.21316	2.60658	95	0.25	0.125	238	0.626316	0.313158	72	0.189474	0.0947368	30	0.0789474	0.0394737	18820	18.82	49.5263	0.0495263	0.0247632
			Meal Totals	22952	60.4	30.2	116	0.305263	0.152632	1575	4.14474	2.07237	1798	4.73158	2.36579	81	0.213158	0.106579	52629	52.629	138.497	0.138497	0.0692487
Pig Meat
Ham	1500	3.94737	38 x Average Portion	1610	4.23684	2.11842	15	0.0394737	0.0197368	276	0.726316	0.363158	50	0.131579	0.0657895	7.6	0.02	0.01	9174	9.174	24.1421	0.0241421	0.0120711
Ham, Parma	1000	2.63158	21 x Average portion	2231	5.87105	2.93553	0	0	0	272	0.715789	0.357895	127	0.334211	0.167105	5.1	0.0134211	0.00671053	6116	6.116	16.0947	0.0160947	0.00804737
			Meal Totals	3841	10.1079	5.05395	15	0.0394737	0.0197368	548	1.44211	0.721053	177	0.465789	0.232895	12.6	0.0331579	0.0165789	15290	15.29	40.2368	0.0402368	0.0201184
Fish (Farmed)
Salmon, farmed, flesh only, raw	8000	21.0526	44 x large fillet	17328	45.6	22.8	0	0	0	1632	4.29474	2.14737	1200	3.15789	1.57895	27.8	0.0731579	0.0365789	17544	17.544	46.1684	0.0461684	0.0230842
Salmon, smoked (cold-smoked)	3000	7.89474	54 x average portion	5523	14.5342	7.26711	15	0.0394737	0.0197368	684	1.8	0.9	303	0.797368	0.398684	10.4	0.0273684	0.0136842	6579	6.579	17.3132	0.0173132	0.00865658
Cod, flesh only, raw	4000	10.5263	23 x Large	3016	7.93684	3.96842	0	0	0	700	1.84211	0.921053	24	0.0631579	0.0315789	8.6	0.0226316	0.0113158	11128	11.128	29.2842	0.0292842	0.0146421
Sea Bass or bream, raw	3000	7.89474	19 x fillet	2752	7.24211	3.62105	0	0	0	553	1.45526	0.727632	60	0.157895	0.0789474	9.8	0.0257895	0.0128947	19572	19.572	51.5053	0.0515053	0.0257526
			Meal Totals	28619	75.3132	37.6566	15	0.0394737	0.0197368	3569	9.39211	4.69605	1587	4.17632	2.08816	57	0.15	0.075	54823	54.823	144.271	0.144271	0.0721355
Poultry
Chicken thigh, grilled	10000	26.3158	50 x Large portion	29500	77.6316	38.8158	0	0	0	2290	6.02632	3.01316	2260	5.94737	2.97368	36.5	0.0960526	0.0480263	33302	33.302	87.6368	0.0876368	0.0438184
Bone broth or stock, chicken, homemade, bones removed	1300	3.42105	5 ¼ x cup	212	0.557895	0.278947	0	0	0	29.4	0.0773684	0.0386842	10.5	0.0276316	0.0138158	0.0274	7.21053e-05	3.60526e-05	0	0	0	0	0
Chicken, light meat, raw	41000	107.895	234 x cup, diced	43419	114.261	57.1303	0	0	0	9840	25.8947	12.9474	451	1.18684	0.593421	107	0.281579	0.140789	136538	136.538	359.311	0.359311	0.179655
Duck, roasted, meat only	5000	13.1579	11 ½ x duck	9740	25.6316	12.8158	0	0	0	1265	3.32895	1.66447	520	1.36842	0.684211	20.5	0.0539474	0.0269737	21625	21.625	56.9079	0.0569079	0.0284539
			Meal Totals	82871	218.082	109.041	0	0	0	13424	35.3263	17.6632	3242	8.53158	4.26579	164	0.431579	0.215789	191465	191.465	503.855	0.503855	0.251928
Eggs
Eggs, chicken, whole, raw	41000	107.895	612 x Jumbo, Size 1	53874	141.774	70.8868	0	0	0	5166	13.5947	6.79737	3690	9.71053	4.85526	142	0.373684	0.186842	148912	148.912	391.874	0.391874	0.195937
			Meal Totals	53874	141.774	70.8868	0	0	0	5166	13.5947	6.79737	3690	9.71053	4.85526	142	0.373684	0.186842	148912	148.912	391.874	0.391874	0.195937
Tofu
			Meal Totals		0	0		0	0		0	0		0	0		0	0		0	0	0	0
Groundnuts
Peanut butter, smooth	200	0.526316	8 x Thick spread on slice	1212	3.18947	1.59474	24.4	0.0642105	0.0321053	46	0.121053	0.0605263	104	0.273684	0.136842	0.166	0.000436842	0.000218421	676	0.676	1.77895	0.00177895	0.000889474
			Meal Totals	1212	3.18947	1.59474	24.4	0.0642105	0.0321053	46	0.121053	0.0605263	104	0.273684	0.136842	0.166	0.000436842	0.000218421	676	0.676	1.77895	0.00177895	0.000889474
Other Pulses
			Meal Totals	0	0	0	0	0	0	0	0	0	0	0	0	0	0	0	0	0	0	0	0
Peas
Peas, frozen, raw	2000	5.26316	25 x NHS serving = 3 tablespoons	1356	3.56842	1.78421	201	0.528947	0.264474	106	0.278947	0.139474	14	0.0368421	0.0184211	5.1	0.0134211	0.00671053	3958	3.958	10.4158	0.0104158	0.00520789
Peas, sugar-snap, raw	1500	3.94737	15 x NHS serving = handful (14 beans)	521	1.37105	0.685526	73	0.192105	0.0960526	51	0.134211	0.0671053	3	0.00789474	0.00394737	3.8	0.01	0.005	2969	2.969	7.81316	0.00781316	0.00390658
			Meal Totals	1877	4.93947	2.46974	274	0.721053	0.360526	157	0.413158	0.206579	17	0.0447368	0.0223684	8.9	0.0234211	0.0117105	6927	6.927	18.2289	0.0182289	0.00911447
Nuts
			Meal Totals		0	0		0	0		0	0		0	0		0	0		0	0	0	0
Grains
Noodles, Udon, cooked, Amoy	1000	2.63158	6 x serving / 1 block	1352	3.55789	1.77895	254	0.668421	0.334211	48	0.126316	0.0631579	16	0.0421053	0.0210526	1.2	0.00315789	0.00157895	1328	1.328	3.49474	0.00349474	0.00174737
Noodles, egg, dried, raw	2000	5.26316	53 x cup	6610	17.3947	8.69737	1323	3.48158	1.74079	240	0.631579	0.315789	40	0.105263	0.0526316	6.3	0.0165789	0.00828947	9274	9.274	24.4053	0.0244053	0.0122026
Corn Flour, wholegrain	250	0.657895	2.14 x 1 cup	852	2.24211	1.12105	174	0.457895	0.228947	17.3	0.0455263	0.0227632	9.7	0.0255263	0.0127632	0.295	0.000776316	0.000388158	462	0.462	1.21579	0.00121579	0.000607895
Flour, wheat, white, self raising	1000	2.63158	8 x cup	3387	8.91316	4.45658	724	1.90526	0.952632	89	0.234211	0.117105	15	0.0394737	0.0197368	1.2	0.00315789	0.00157895	1849	1.849	4.86579	0.00486579	0.00243289
Flour, wheat, wholemeal	2000	5.26316	14 x cup	6378	16.7842	8.39211	1273	3.35	1.675	232	0.610526	0.305263	40	0.105263	0.0526316	2.4	0.00631579	0.00315789	3698	3.698	9.73158	0.00973158	0.00486579
			Meal Totals	18580	48.8947	24.4474	3747	9.86053	4.93026	626	1.64737	0.823684	121	0.318421	0.159211	11.3	0.0297368	0.0148684	16611	16.611	43.7132	0.0437132	0.0218566
Milk
Flora Light Spread	10000	26.3158	44 x cup	28320	74.5263	37.2632	280	0.736842	0.368421	50	0.131579	0.0657895	3000	7.89474	3.94737	47	0.123684	0.0618421	0	0	0	0	0
Margarine, Flora Original	500	1.31579	2 x cup & 4 x teaspoon	2039	5.36579	2.68289	2.5	0.00657895	0.00328947	1	0.00263158	0.00131579	225	0.592105	0.296053	2.1	0.00552632	0.00276316	2777	2.777	7.30789	0.00730789	0.00365395
Arla Protein Strawberry 20g	12000	31.5789	60 x Per pack	8184	21.5368	10.7684	792	2.08421	1.04211	1200	3.15789	1.57895	24	0.0631579	0.0315789	16.3	0.0428947	0.0214474	19908	19.908	52.3895	0.0523895	0.0261947
Ubley Low Fat Natural Yogurt 150g	36000	94.7368	240 x Per pack	20916	55.0421	27.5211	2088	5.49474	2.74737	1764	4.64211	2.32105	612	1.61053	0.805263	72	0.189474	0.0947368	59724	59.724	157.168	0.157168	0.0785842
Cream, fresh, double, including Jersey cream	564	1.48421	19 x Average Portion	2798	7.36316	3.68158	9.1	0.0239474	0.0119737	9	0.0236842	0.0118421	303	0.797368	0.398684	3.2	0.00842105	0.00421053	2165	2.165	5.69737	0.00569737	0.00284868
Butter, unsalted	2050	5.39474	8 x cup	15262	40.1632	20.0816	11.7	0.0307895	0.0153947	12.3	0.0323684	0.0161842	1685	4.43421	2.21711	18.5	0.0486842	0.0243421	11384	11.384	29.9579	0.0299579	0.0149789
Milk, semi-skimmed, pasteurised, average	168569	443.603	674 x cup / serving	79598	209.468	104.734	7552	19.8737	9.93684	5900	15.5263	7.76316	2866	7.54211	3.77105	258	0.678947	0.339474	269542	269.542	709.321	0.709321	0.354661
			Meal Totals	157118	413.468	206.734	10735	28.25	14.125	8936	23.5158	11.7579	8715	22.9342	11.4671	416	1.09474	0.547368	365499	365.499	961.839	0.961839	0.48092
Soymilk
Milk, soya, non-dairy alternative to milk, unsweetened, fortified	2970	7.81579	12 x cup / serving	767	2.01842	1.00921	13.7	0.0360526	0.0180263	71	0.186842	0.0934211	48	0.126316	0.0631579	2.6	0.00684211	0.00342105	11176	11.176	29.4105	0.0294105	0.0147053
Soya yogurt, Alpro, plain, fortified,	3000	7.89474	24 x average pot	1073	2.82368	1.41184	48	0.126316	0.0631579	96	0.252632	0.126316	55	0.144737	0.0723684	4.1	0.0107895	0.00539474	0	0	0	0	0
			Meal Totals	1840	4.84211	2.42105	62	0.163158	0.0815789	167	0.439474	0.219737	103	0.271053	0.135526	6.7	0.0176316	0.00881579	11176	11.176	29.4105	0.0294105	0.0147053
Other Milks
Almond Milk, unsweetened	6000	15.7895	24 x cup / serving	2454	6.45789	3.22895	29.4	0.0773684	0.0386842	88	0.231579	0.115789	221	0.581579	0.290789	5.9	0.0155263	0.00776316	22578	22.578	59.4158	0.0594158	0.0297079
Oat Milk, unsweetened, with calcium	7920	20.8421	32 x cup / serving	3389	8.91842	4.45921	499	1.31316	0.656579	81	0.213158	0.106579	119	0.313158	0.156579	7.8	0.0205263	0.0102632	29803	29.803	78.4289	0.0784289	0.0392145
			Meal Totals	5843	15.3763	7.68816	528	1.38947	0.694737	169	0.444737	0.222368	339	0.892105	0.446053	13.8	0.0363158	0.0181579	52381	52.381	137.845	0.137845	0.0689224
Cassava
			Meal Totals	0	0	0	0	0	0	0	0	0	0	0	0	0	0	0	0	0	0	0	0
Rice (Flooded)
Noodles, rice, fine, dried, boiled in unsalted water	1000	2.63158	3 ½ x Average serving	869	2.28684	1.14342	194	0.510526	0.255263	19	0.05	0.025	2	0.00526316	0.00263158	1.2	0.00315789	0.00157895	1328	1.328	3.49474	0.00349474	0.00174737
Rice, white, Italian Arborio risotto, raw	1500	3.94737		5161	13.5816	6.79079	1161	3.05526	1.52763	96	0.252632	0.126316	15	0.0394737	0.0197368	0	0	0	0	0	0	0	0
Brown rice, basmati, dry	7000	18.4211	35 x cup	23315	61.3553	30.6776	5292	13.9263	6.96316	475	1.25	0.625	27.3	0.0718421	0.0359211	17.9	0.0471053	0.0235526	17479	17.479	45.9974	0.0459974	0.0229987
			Meal Totals	29345	77.2237	38.6118	6646	17.4895	8.74474	590	1.55263	0.776316	44	0.115789	0.0578947	19	0.05	0.025	18807	18.807	49.4921	0.0494921	0.0247461
Oatmeal
Porridge oats, unfortified	5000	13.1579	100 x cup	18683	49.1658	24.5829	3215	8.46053	4.23026	545	1.43421	0.717105	405	1.06579	0.532895	1.9	0.005	0.0025	12080	12.08	31.7895	0.0317895	0.0158947
			Meal Totals	18683	49.1658	24.5829	3215	8.46053	4.23026	545	1.43421	0.717105	405	1.06579	0.532895	1.9	0.005	0.0025	12080	12.08	31.7895	0.0317895	0.0158947
Potatoes
Sweet potato, raw, flesh only	12000	31.5789	13 x extra large	10342	27.2158	13.6079	2360	6.21053	3.10526	144	0.378947	0.189474	36	0.0947368	0.0473684	6	0.0157895	0.00789474	4596	4.596	12.0947	0.0120947	0.00604737
Potatoes, old, raw, flesh only	10000	26.3158	27 x large whit/red 9-12cm diameter	8010	21.0789	10.5395	1790	4.71053	2.35526	190	0.5	0.25	10	0.0263158	0.0131579	6	0.0157895	0.00789474	111909	111.909	294.497	0.294497	0.147249
Potatoes, new and salad, flesh only, raw	10000	26.3158	238 x average	6658	17.5211	8.76053	1472	3.87368	1.93684	170	0.447368	0.223684	10	0.0263158	0.0131579	6	0.0157895	0.00789474	111909	111.909	294.497	0.294497	0.147249
			Meal Totals	25010	65.8158	32.9079	5622	14.7947	7.39737	504	1.32632	0.663158	56	0.147368	0.0736842	18	0.0473684	0.0236842	228414	228.414	601.089	0.601089	0.300545
Wheat & Rye (Bread)
Hirata Bao Buns 1.5kg	3000	7.89474	2 x Per pack	8178	21.5211	10.7605	1590	4.18421	2.09211	198	0.521053	0.260526	114	0.3	0.15	1.9	0.005	0.0025	2001	2.001	5.26579	0.00526579	0.00263289
Bread, naan, retail	3000	7.89474	22 x naan	8404	22.1158	11.0579	1374	3.61579	1.80789	234	0.615789	0.307895	219	0.576316	0.288158	2.8	0.00736842	0.00368421	4824	4.824	12.6947	0.0126947	0.00634737
Demi Baguette	3750	9.86842	30 x demi baguette	9626	25.3316	12.6658	1909	5.02368	2.51184	338	0.889474	0.444737	71	0.186842	0.0934211	2.4	0.00631579	0.00315789	2501	2.501	6.58158	0.00658158	0.00329079
Bread rolls, white, soft	9120	24	65 x large 12	22658	59.6263	29.8132	4283	11.2711	5.63553	848	2.23158	1.11579	237	0.623684	0.311842	8.8	0.0231579	0.0115789	6083	6.083	16.0079	0.0160079	0.00800395
Tortilla, wheat, soft	1080	2.84211	16 x large	3016	7.93684	3.96842	531	1.39737	0.698684	84	0.221053	0.110526	62	0.163158	0.0815789	1	0.00263158	0.00131579	0	0	0	0	0
Muffins, English style, white	1700	4.47368	25 x muffin	3724	9.8	4.9	688	1.81053	0.905263	170	0.447368	0.223684	32.3	0.085	0.0425	1.4	0.00368421	0.00184211	2734	2.734	7.19474	0.00719474	0.00359737
Bagels, plain	13500	35.5263	150 x average	36196	95.2526	47.6263	7152	18.8211	9.41053	1350	3.55263	1.77632	243	0.639474	0.319737	10.1	0.0265789	0.0132895	9005	9.005	23.6974	0.0236974	0.0118487
Bread, pitta, white	3000	7.89474	71 x Large	7498	19.7316	9.86579	1514	3.98421	1.99211	273	0.718421	0.359211	39	0.102632	0.0513158	2.8	0.00736842	0.00368421	3093	3.093	8.13947	0.00813947	0.00406974
Bread, sourdough, white	1500	3.94737	20 x Average serving	4192	11.0316	5.51579	810	2.13158	1.06579	176	0.463158	0.231579	27.5	0.0723684	0.0361842	1.4	0.00368421	0.00184211	1547	1.547	4.07105	0.00407105	0.00203553
Bread, brown, average	4800	12.6316	74 x Average Portion	9788	25.7579	12.8789	1852	4.87368	2.43684	379	0.997368	0.498684	96	0.252632	0.126316	4.5	0.0118421	0.00592105	4949	4.949	13.0237	0.0130237	0.00651184
			Meal Totals	113280	298.105	149.053	21703	57.1132	28.5566	4050	10.6579	5.32895	1141	3.00263	1.50132	37.2	0.0978947	0.0489474	36736	36.736	96.6737	0.0966737	0.0483368
Maize (Meal)
Sweetcorn, kernels, 'on-the-cob', raw, weighed with core	3000	7.89474	21 x Long	1073	2.82368	1.41184	134	0.352632	0.176316	60	0.157895	0.0789474	33	0.0868421	0.0434211	4.8	0.0126316	0.00631579	2100	2.1	5.52632	0.00552632	0.00276316
Sweetcorn, baby, boiled in unsalted water	1500	3.94737	32 x Average Portion	482	1.26842	0.634211	67	0.176316	0.0881579	33	0.0868421	0.0434211	9	0.0236842	0.0118421	2.4	0.00631579	0.00315789	1050	1.05	2.76316	0.00276316	0.00138158
			Meal Totals	1555	4.09211	2.04605	201	0.528947	0.264474	93	0.244737	0.122368	42	0.110526	0.0552632	7.2	0.0189474	0.00947368	3150	3.15	8.28947	0.00828947	0.00414474
Palm Oil
			Meal Totals	0	0	0	0	0	0	0	0	0	0	0	0	0	0	0	0	0	0	0	0
Soybean Oil
			Meal Totals	0	0	0	0	0	0	0	0	0	0	0	0	0	0	0	0	0	0	0	0
Olive Oil
Oil, olive	750	1.97368	3 ¼ x cup	6743	17.7447	8.87237	0	0	0	0	0	0	749	1.97105	0.985526	2.5	0.00657895	0.00328947	10812	10.812	28.4526	0.0284526	0.0142263
			Meal Totals	6743	17.7447	8.87237	0	0	0	0	0	0	749	1.97105	0.985526	2.5	0.00657895	0.00328947	10812	10.812	28.4526	0.0284526	0.0142263
Rapeseed Oil
Oil, rapeseed	6000	15.7895	26 x cup	53946	141.963	70.9816	0	0	0	0	0	0	5994	15.7737	7.88684	2.4	0.00631579	0.00315789	25806	25.806	67.9105	0.0679105	0.0339553
			Meal Totals	53946	141.963	70.9816	0	0	0	0	0	0	5994	15.7737	7.88684	2.4	0.00631579	0.00315789	25806	25.806	67.9105	0.0679105	0.0339553
Sunflower Oil
			Meal Totals	0	0	0	0	0	0	0	0	0	0	0	0	0	0	0	0	0	0	0	0
Other Oils
Oil, sesame	300	0.789474	1 x cup & 5 x tablespoon	2694	7.08947	3.54474	0	0	0	0.6	0.00157895	0.000789474	299	0.786842	0.393421	0.6492	0.00170842	0.000854211	6538	6.538	17.2053	0.0172053	0.00860263
			Meal Totals	2694	7.08947	3.54474	0	0	0	0.6	0.00157895	0.000789474	299	0.786842	0.393421	0.6492	0.00170842	0.000854211	6538	6.538	17.2053	0.0172053	0.00860263
Tomatoes
Tomatoes, sun dried without oil	1000	2.63158	18 ½ x cup	2572	6.76842	3.38421	435	1.14474	0.572368	141	0.371053	0.185526	29.7	0.0781579	0.0390789	0.96	0.00252632	0.00126316	713	0.713	1.87632	0.00187632	0.000938158
Plum Tomatoes	5000	13.1579	18 x large/beef	680	1.78947	0.894737	145	0.381579	0.190789	25	0.0657895	0.0328947	0	0	0	0.77	0.00202632	0.00101316	3565	3.565	9.38158	0.00938158	0.00469079
Tomatoes, cherry, raw	5000	13.1579	36 x cup	1165	3.06579	1.53289	180	0.473684	0.236842	55	0.144737	0.0723684	25	0.0657895	0.0328947	4.8	0.0126316	0.00631579	1070	1.07	2.81579	0.00281579	0.00140789
			Meal Totals	4417	11.6237	5.81184	760	2	1	221	0.581579	0.290789	55	0.144737	0.0723684	6.5	0.0171053	0.00855263	5348	5.348	14.0737	0.0140737	0.00703684
Brassicas
Radish, red, flesh and skin, raw	250	0.657895	12 ½ x all sizes radish	30	0.0789474	0.0394737	3.5	0.00921053	0.00460526	1.8	0.00473684	0.00236842	1	0.00263158	0.00131579	0.0375	9.86842e-05	4.93421e-05	197	0.197	0.518421	0.000518421	0.000259211
Pak choi, steamed	1000	2.63158	17 x Average Portion	143	0.376316	0.188158	18.6	0.0489474	0.0244737	15	0.0394737	0.0197368	1	0.00263158	0.00131579	0.73	0.00192105	0.000960526	0	0	0	0	0
Cabbage, average, raw	1000	2.63158	13 x cup, shredded	266	0.7	0.35	44	0.115789	0.0578947	18	0.0473684	0.0236842	2	0.00526316	0.00263158	0.23	0.000605263	0.000302632	280	0.28	0.736842	0.000736842	0.000368421
Cauliflower, raw	3000	7.89474	26 x cup	918	2.41579	1.20789	128	0.336842	0.168421	75	0.197368	0.0986842	12	0.0315789	0.0157895	0.93	0.00244737	0.00122368	855	0.855	2.25	0.00225	0.001125
Curly kale, raw	3000	7.89474	167 x cup, 1 inch pieces, loosely packed	1007	2.65	1.325	42	0.110526	0.0552632	102	0.268421	0.134211	48	0.126316	0.0631579	4.4	0.0115789	0.00578947	0	0	0	0	0
Broccolini	7500	19.7368	79 x cup, chopped	2625	6.90789	3.45395	233	0.613158	0.306579	323	0.85	0.425	45	0.118421	0.0592105	4.5	0.0118421	0.00592105	2438	2.438	6.41579	0.00641579	0.00320789
			Meal Totals	4989	13.1289	6.56447	468	1.23158	0.615789	534	1.40526	0.702632	109	0.286842	0.143421	10.8	0.0284211	0.0142105	3769	3.769	9.91842	0.00991842	0.00495921
Onions & Leeks
Onions, raw	10000	26.3158	42 x large	3586	9.43684	4.71842	774	2.03684	1.01842	100	0.263158	0.131579	10	0.0263158	0.0131579	7.6	0.02	0.01	2903	2.903	7.63947	0.00763947	0.00381974
Spring onions, bulbs and tops, raw	1000	2.63158	91 x Average Portion	244	0.642105	0.321053	29.7	0.0781579	0.0390789	20	0.0526316	0.0263158	5	0.0131579	0.00657895	0.76	0.002	0.001	290	0.29	0.763158	0.000763158	0.000381579
Onions, red, raw	10000	26.3158	54 x large onion	3486	9.17368	4.58684	740	1.94737	0.973684	100	0.263158	0.131579	14	0.0368421	0.0184211	7.6	0.02	0.01	2903	2.903	7.63947	0.00763947	0.00381974
Leeks, raw	6000	15.7895	67 x leek	1442	3.79474	1.89737	244	0.642105	0.321053	90	0.236842	0.118421	12	0.0315789	0.0157895	4.3	0.0113158	0.00565789	2034	2.034	5.35263	0.00535263	0.00267632
			Meal Totals	8758	23.0474	11.5237	1787	4.70263	2.35132	310	0.815789	0.407895	41	0.107895	0.0539474	20.2	0.0531579	0.0265789	8129	8.129	21.3921	0.0213921	0.0106961
Root Vegetables
Beetroot, raw	6000	15.7895	75 x beet	2197	5.78158	2.89079	434	1.14211	0.571053	102	0.268421	0.134211	6	0.0157895	0.00789474	1.4	0.00368421	0.00184211	0	0	0	0	0
Parsnip, raw	5000	13.1579	29 x Large Portion (Average)	3191	8.39737	4.19868	584	1.53684	0.768421	90	0.236842	0.118421	55	0.144737	0.0723684	1.5	0.00394737	0.00197368	0	0	0	0	0
Ginger, fresh	250	0.657895	50 x thumb (2cm)	111	0.292105	0.146053	18.8	0.0494737	0.0247368	4.5	0.0118421	0.00592105	2	0.00526316	0.00263158	0.22	0.000578947	0.000289474	414	0.414	1.08947	0.00108947	0.000544737
Garlic, raw	500	1.31579	26 x jumbo clove	484	1.27368	0.636842	75	0.197368	0.0986842	39.5	0.103947	0.0519737	3	0.00789474	0.00394737	0.285	0.00075	0.000375	295	0.295	0.776316	0.000776316	0.000388158
Carrots, old, raw	14000	36.8421	108 x cup, chopped	4889	12.8658	6.43289	1026	2.7	1.35	70	0.184211	0.0921053	56	0.147368	0.0736842	17.9	0.0471053	0.0235526	2730	2.73	7.18421	0.00718421	0.00359211
			Meal Totals	10872	28.6105	14.3053	2138	5.62632	2.81316	306	0.805263	0.402632	122	0.321053	0.160526	21.3	0.0560526	0.0280263	3439	3.439	9.05	0.00905	0.004525
Other Vegetables
Vegetable stock, homemade	100	0.263158	0.4 x 1 cup	8.6	0.0226316	0.0113158	1.7	0.00447368	0.00223684	0.2868	0.000754737	0.000377368	0.0758	0.000199474	9.97368e-05	0.18	0.000473684	0.000236842	0	0	0	0	0
Spinach, baby, raw	1000	2.63158	12 ½ x NHS Serving (1 cereal bowl)	166	0.436842	0.218421	1.9	0.005	0.0025	26	0.0684211	0.0342105	6	0.0157895	0.00789474	0.34	0.000894737	0.000447368	292	0.292	0.768421	0.000768421	0.000384211
Peppers, bell, raw, mixed	5000	13.1579	41 x Average Portion	1295	3.40789	1.70395	240	0.631579	0.315789	50	0.131579	0.0657895	15	0.0394737	0.0197368	3.3	0.00868421	0.00434211	36825	36.825	96.9079	0.0969079	0.0484539
Lettuce, average, raw	500	1.31579	10 x Medium portion	57	0.15	0.075	7	0.0184211	0.00921053	6	0.0157895	0.00789474	0.5	0.00131579	0.000657895	1.3	0.00342105	0.00171053	119	0.119	0.313158	0.000313158	0.000156579
Courgette, raw	5000	13.1579	63 x Medium portion / NHS Serving	808	2.12632	1.06316	115	0.302632	0.151316	65	0.171053	0.0855263	10	0.0263158	0.0131579	8.9	0.0234211	0.0117105	1680	1.68	4.42105	0.00442105	0.00221053
Celery, raw	500	1.31579	8 ½ x stick	43	0.113158	0.0565789	7	0.0184211	0.00921053	2.5	0.00657895	0.00328947	0.5	0.00131579	0.000657895	0.09	0.000236842	0.000118421	0	0	0	0	0
Squash, butternut, raw	2000	5.26316	14 x cup cubes	708	1.86316	0.931579	150	0.394737	0.197368	22	0.0578947	0.0289474	2	0.00526316	0.00263158	0.5	0.00131579	0.000657895	672	0.672	1.76842	0.00176842	0.000884211
Beans, green, raw	3000	7.89474	43 x NHS Serving (4 tablespoons/1/2 cup)	733	1.92895	0.964474	93	0.244737	0.122368	63	0.165789	0.0828947	12	0.0315789	0.0157895	1.5	0.00394737	0.00197368	1548	1.548	4.07368	0.00407368	0.00203684
			Meal Totals	3817	10.0447	5.02237	616	1.62105	0.810526	235	0.618421	0.309211	46	0.121053	0.0605263	16.1	0.0423684	0.0211842	41136	41.136	108.253	0.108253	0.0541263
Berries
Raspberries, raw	10000	26.3158	154 x Half cup	2630	6.92105	3.46053	510	1.34211	0.671053	80	0.210526	0.105263	30	0.0789474	0.0394737	8.4	0.0221053	0.0110526	4130	4.13	10.8684	0.0108684	0.00543421
Strawberries, raw	10000	26.3158	41 x cup, puree	3130	8.23684	4.11842	610	1.60526	0.802632	60	0.157895	0.0789474	50	0.131579	0.0657895	17	0.0447368	0.0223684	3470	3.47	9.13158	0.00913158	0.00456579
Blueberries	10000	26.3158	417 x Average Portion	4180	11	5.5	910	2.39474	1.19737	90	0.236842	0.118421	20	0.0526316	0.0263158	7.8	0.0205263	0.0102632	8450	8.45	22.2368	0.0222368	0.0111184
			Meal Totals	9940	26.1579	13.0789	2030	5.34211	2.67105	230	0.605263	0.302632	100	0.263158	0.131579	33.2	0.0873684	0.0436842	16050	16.05	42.2368	0.0422368	0.0211184
Bananas
Bananas, flesh only	20000	52.6316	167 x Large	17116	45.0421	22.5211	4000	10.5263	5.26316	240	0.631579	0.315789	20	0.0526316	0.0263158	18	0.0473684	0.0236842	15800	15.8	41.5789	0.0415789	0.0207895
			Meal Totals	17116	45.0421	22.5211	4000	10.5263	5.26316	240	0.631579	0.315789	20	0.0526316	0.0263158	18	0.0473684	0.0236842	15800	15.8	41.5789	0.0415789	0.0207895
Apples
Apple juice, fresh	6000	15.7895	20 x Tall tumbler	1916	5.04211	2.52105	462	1.21579	0.607895	3.6	0.00947368	0.00473684	6	0.0157895	0.00789474	17	0.0447368	0.0223684	1602	1.602	4.21579	0.00421579	0.00210789
Apples, eating, raw, flesh and skin	10000	26.3158	43 x Large	5278	13.8895	6.94474	1147	3.01842	1.50921	60	0.157895	0.0789474	50	0.131579	0.0657895	2.9	0.00763158	0.00381579	38345	38.345	100.908	0.100908	0.0504539
			Meal Totals	7194	18.9316	9.46579	1609	4.23421	2.11711	64	0.168421	0.0842105	56	0.147368	0.0736842	19.9	0.0523684	0.0261842	39947	39.947	105.124	0.105124	0.0525618
Citrus
Citrus fruit, soft/easy peelers, flesh only	6000	15.7895	75 x Large	2510	6.60526	3.30263	559	1.47105	0.735526	42	0.110526	0.0552632	12	0.0315789	0.0157895	2.3	0.00605263	0.00302632	13671	13.671	35.9763	0.0359763	0.0179882
Limes, flesh only	2000	5.26316	41 x all sizes fruit	174	0.457895	0.228947	16	0.0421053	0.0210526	14	0.0368421	0.0184211	6	0.0157895	0.00789474	0.52	0.00136842	0.000684211	1284	1.284	3.37895	0.00337895	0.00168947
Lemons, whole, without pips	2000	5.26316	15 x Average lemon	388	1.02105	0.510526	64	0.168421	0.0842105	20	0.0526316	0.0263158	6	0.0157895	0.00789474	0.52	0.00136842	0.000684211	1284	1.284	3.37895	0.00337895	0.00168947
			Meal Totals	3073	8.08684	4.04342	638	1.67895	0.839474	76	0.2	0.1	24	0.0631579	0.0315789	3.3	0.00868421	0.00434211	16239	16.239	42.7342	0.0427342	0.0213671
Other Fruits
Coconut milk, canned	2040	5.36842	5 x average can	3672	9.66316	4.83158	69	0.181579	0.0907895	22.4	0.0589474	0.0294737	367	0.965789	0.482895	2	0.00526316	0.00263158	7677	7.677	20.2026	0.0202026	0.0101013
Plums, dessert, flesh and skin, raw	6000	15.7895	43 x cup, chopped	2627	6.91316	3.45658	580	1.52632	0.763158	36	0.0947368	0.0473684	18	0.0473684	0.0236842	1.6	0.00421053	0.00210526	13080	13.08	34.4211	0.0344211	0.0172105
Pears, raw, flesh and skin	10000	26.3158	56 x large	4546	11.9632	5.98158	1084	2.85263	1.42632	30	0.0789474	0.0394737	10	0.0263158	0.0131579	7.5	0.0197368	0.00986842	9220	9.22	24.2632	0.0242632	0.0121316
Melon, watermelon, flesh only	4000	10.5263	16 x Average slice	1298	3.41579	1.70789	278	0.731579	0.365789	20	0.0526316	0.0263158	12	0.0315789	0.0157895	5.4	0.0142105	0.00710526	940	0.94	2.47368	0.00247368	0.00123684
Pineapple, flesh only, raw	24000	63.1579	27 x total fruit (flesh only)	11400	30	15	2676	7.04211	3.52105	120	0.315789	0.157895	24	0.0631579	0.0315789	32.2	0.0847368	0.0423684	6120	6.12	16.1053	0.0161053	0.00805263
Melon, Canteloupe-type, flesh only	12000	31.5789	92 x Average slice	2412	6.34737	3.17368	504	1.32632	0.663158	72	0.189474	0.0947368	12	0.0315789	0.0157895	3	0.00789474	0.00394737	11592	11.592	30.5053	0.0305053	0.0152526
Grapes, average	6000	15.7895	60 x Small bunch	4140	10.8947	5.44737	966	2.54211	1.27105	42	0.110526	0.0552632	12	0.0315789	0.0157895	2.2	0.00578947	0.00289474	3648	3.648	9.6	0.0096	0.0048
Kiwi fruit, flesh only, raw	3000	7.89474	50 x medium	1367	3.59737	1.79868	257	0.676316	0.338158	24	0.0631579	0.0315789	27	0.0710526	0.0355263	1.1	0.00289474	0.00144737	1542	1.542	4.05789	0.00405789	0.00202895
Cucumber, raw, flesh and skin	3000	7.89474	5 x average cucumber	426	1.12105	0.560526	36	0.0947368	0.0473684	30	0.0789474	0.0394737	18	0.0473684	0.0236842	0.69	0.00181579	0.000907895	1059	1.059	2.78684	0.00278684	0.00139342
Avocado, Hass, flesh only, weighed with skin and stone	5040	13.2632	22 x Cup, Puree	5949	15.6553	7.82763	61	0.160526	0.0802632	66	0.173684	0.0868421	605	1.59211	0.796053	6.8	0.0178947	0.00894737	9984	9.984	26.2737	0.0262737	0.0131368
			Meal Totals	37838	99.5737	49.7868	6511	17.1342	8.56711	462	1.21579	0.607895	1105	2.90789	1.45395	62	0.163158	0.0815789	64862	64.862	170.689	0.170689	0.0853447
Cane Sugar
Sugar, icing	50	0.131579	17 x teaspoon	200	0.526316	0.263158	50	0.131579	0.0657895	0	0	0	0	0	0	0.016	4.21053e-05	2.10526e-05	45	0.045	0.118421	0.000118421	5.92105e-05
Sugar, caster	1500	3.94737	7 x cup	6000	15.7895	7.89474	1500	3.94737	1.97368	0	0	0	0	0	0	0.48	0.00126316	0.000631579	1339	1.339	3.52368	0.00352368	0.00176184
Sugar, brown	200	0.526316	10 x tablespoon	773	2.03421	1.01711	193	0.507895	0.253947	0.2	0.000526316	0.000263158	0	0	0	0.064	0.000168421	8.42105e-05	179	0.179	0.471053	0.000471053	0.000235526
			Meal Totals	6972	18.3474	9.17368	1743	4.58684	2.29342	0.2	0.000526316	0.000263158	0	0	0	0.56	0.00147368	0.000736842	1562	1.562	4.11053	0.00411053	0.00205526
Beet Sugar
			Meal Totals	0	0	0	0	0	0	0	0	0	0	0	0	0	0	0	0	0	0	0	0
Beer (5% ABV)
			Meal Totals	0	0	0	0	0	0	0	0	0	0	0	0	0	0	0	0	0	0	0	0
Wine (12.5% ABV)
			Meal Totals	0	0	0	0	0	0	0	0	0	0	0	0	0	0	0	0	0	0	0	0
Dark Chocolate
Chocolate, dark, 70-84% Cocoa	150	0.394737	9 x Average Portion	870	2.28947	1.14474	54	0.142105	0.0710526	13.7	0.0360526	0.0180263	63	0.165789	0.0828947	0.4065	0.00106974	0.000534868	2579	2.579	6.78684	0.00678684	0.00339342
			Meal Totals	870	2.28947	1.14474	54	0.142105	0.0710526	13.7	0.0360526	0.0180263	63	0.165789	0.0828947	0.4065	0.00106974	0.000534868	2579	2.579	6.78684	0.00678684	0.00339342
Coffee
NESCAFÉ GOLD Cappuccino Decaf Unsweetened Taste Coffee, 8 Sachets x 14.2g	660	1.73684	5 ½ x Per pack	162	0.426316	0.213158	21.8	0.0573684	0.0286842	5.3	0.0139474	0.00697368	5.9	0.0155263	0.00776316	7.8	0.0205263	0.0102632	0	0	0	0	0
Coffee, espresso shot, brewed	6000	15.7895	100 x Double Shot	534	1.40526	0.702632	102	0.268421	0.134211	7.2	0.0189474	0.00947368	10.8	0.0284211	0.0142105	3.3	0.00868421	0.00434211	0	0	0	0	0
			Meal Totals	696	1.83158	0.915789	124	0.326316	0.163158	12.5	0.0328947	0.0164474	16.7	0.0439474	0.0219737	11.1	0.0292105	0.0146053	0	0	0	0	0
Herbs
Bay leaf, dried	10	0.0263158	14 x average	30	0.0789474	0.0394737	4.9	0.0128947	0.00644737	0.76	0.002	0.001	0.84	0.00221053	0.00110526	0.0096	2.52632e-05	1.26316e-05	0	0	0	0	0
Basil, fresh	300	0.789474	600 x leaves	120	0.315789	0.157895	15.3	0.0402632	0.0201316	9.3	0.0244737	0.0122368	2.4	0.00631579	0.00315789	0.286	0.000752632	0.000376316	0	0	0	0	0
Thyme, fresh	100	0.263158	100 x sprigs	95	0.25	0.125	15.1	0.0397368	0.0198684	3	0.00789474	0.00394737	2.5	0.00657895	0.00328947	0.0953	0.000250789	0.000125395	0	0	0	0	0
Rosemary, fresh	100	0.263158	59 x tbsp	99	0.260526	0.130263	13.5	0.0355263	0.0177632	1.4	0.00368421	0.00184211	4.4	0.0115789	0.00578947	0.0953	0.000250789	0.000125395	0	0	0	0	0
Parsley, fresh	300	0.789474	5 x cup chopped	103	0.271053	0.135526	8	0.0210526	0.0105263	9	0.0236842	0.0118421	3.9	0.0102632	0.00513158	0.286	0.000752632	0.000376316	0	0	0	0	0
Mint, fresh	100	0.263158	100 x sprigs	41	0.107895	0.0539474	4.8	0.0126316	0.00631579	3.8	0.01	0.005	0.7	0.00184211	0.000921053	0.0953	0.000250789	0.000125395	28.8	0.0288	0.0757895	7.57895e-05	3.78947e-05
Dill, fresh	50	0.131579	50 x sprigs	12.8	0.0336842	0.0168421	0.44	0.00115789	0.000578947	1.9	0.005	0.0025	0.4	0.00105263	0.000526316	0.0477	0.000125526	6.27632e-05	0	0	0	0	0
Coriander leaves, fresh	400	1.05263	6 x cup chopped	70	0.184211	0.0921053	4.7	0.0123684	0.00618421	8.4	0.0221053	0.0110526	2	0.00526316	0.00263158	0.4895	0.00128816	0.000644079	3312	3.312	8.71579	0.00871579	0.00435789
Chives, fresh	100	0.263158	33 x tablespoon	27.1	0.0713158	0.0356579	1.9	0.005	0.0025	3.3	0.00868421	0.00434211	0.7	0.00184211	0.000921053	0.1014	0.000266842	0.000133421	0	0	0	0	0
			Meal Totals	598	1.57368	0.786842	69	0.181579	0.0907895	41	0.107895	0.0539474	17.8	0.0468421	0.0234211	1.5	0.00394737	0.00197368	3341	3.341	8.79211	0.00879211	0.00439605
Funghi
Mushrooms, oyster, raw	2000	5.26316	29 x cup	164	0.431579	0.215789	0	0	0	32	0.0842105	0.0421053	4	0.0105263	0.00526316	0.54	0.00142105	0.000710526	1224	1.224	3.22105	0.00322105	0.00161053
Mushrooms, white, raw	6000	15.7895	86 x cup, pieces	420	1.10526	0.552632	18	0.0473684	0.0236842	60	0.157895	0.0789474	12	0.0315789	0.0157895	1.6	0.00421053	0.00210526	3671	3.671	9.66053	0.00966053	0.00483026
			Meal Totals	584	1.53684	0.768421	18	0.0473684	0.0236842	92	0.242105	0.121053	16	0.0421053	0.0210526	2.2	0.00578947	0.00289474	4894	4.894	12.8789	0.0128789	0.00643947
Spices
Cinnamon Sticks, Ceylon	30	0.0789474	15 x Per average stick	101	0.265789	0.132895	24	0.0631579	0.0315789	0	0	0	0.6	0.00157895	0.000789474	0.0304	8e-05	4e-05	0	0	0	0	0
Cumin seeds	10	0.0263158	5 x teaspoon	28.1	0.0739474	0.0369737	0.23	0.000605263	0.000302632	1.8	0.00473684	0.00236842	2.2	0.00578947	0.00289474	0.0101	2.65789e-05	1.32895e-05	0	0	0	0	0
Garam masala	20	0.0526316	11 x teaspoon	72	0.189474	0.0947368	8.2	0.0215789	0.0107895	3.1	0.00815789	0.00407895	3	0.00789474	0.00394737	0.0203	5.34211e-05	2.67105e-05	0	0	0	0	0
Seasoning spice pack, retail (eg. fajitas)	10	0.0263158	1.43 x 1 tablespoon	28.6	0.0752632	0.0376316	5.9	0.0155263	0.00776316	0.75	0.00197368	0.000986842	0.22	0.000578947	0.000289474	0.0101	2.65789e-05	1.32895e-05	0	0	0	0	0
Cajun spice mix	70	0.184211	8 x tablespoon	143	0.376316	0.188158	19.7	0.0518421	0.0259211	6.8	0.0178947	0.00894737	4	0.0105263	0.00526316	0.0618	0.000162632	8.13158e-05	0	0	0	0	0
Chinese 5 spice	30	0.0789474	5 x tablespoon	37.2	0.0978947	0.0489474	0.57	0.0015	0.00075	2.9	0.00763158	0.00381579	2.6	0.00684211	0.00342105	0.0265	6.97368e-05	3.48684e-05	0	0	0	0	0
Chilli powder	20	0.0526316	2 ½ x tablespoon	42	0.110526	0.0552632	1.4	0.00368421	0.00184211	2.7	0.00710526	0.00355263	2.9	0.00763158	0.00381579	0.0164	4.31579e-05	2.15789e-05	45	0.045	0.118421	0.000118421	5.92105e-05
Cinnamon, ground	20	0.0526316	8 x teaspoon	7.1	0.0186842	0.00934211	0.44	0.00115789	0.000578947	0.8	0.00210526	0.00105263	0.24	0.000631579	0.000315789	0.0203	5.34211e-05	2.67105e-05	0	0	0	0	0
Paprika	50	0.131579	7 x tablespoon	107	0.281579	0.140789	5.1	0.0134211	0.00671053	7.1	0.0186842	0.00934211	6.5	0.0171053	0.00855263	0.0576	0.000151579	7.57895e-05	0	0	0	0	0
Garlic powder	20	0.0526316	6 ½ x teaspoon	48	0.126316	0.0631579	7.8	0.0205263	0.0102632	3.7	0.00973684	0.00486842	0.24	0.000631579	0.000315789	0.0164	4.31579e-05	2.15789e-05	45	0.045	0.118421	0.000118421	5.92105e-05
Pepper, black	570	1.5	83 x tablespoon	420	1.10526	0.552632	3.4	0.00894737	0.00447368	59	0.155263	0.0776316	18.8	0.0494737	0.0247368	0.6564	0.00172737	0.000863684	164	0.164	0.431579	0.000431579	0.000215789
			Meal Totals	1035	2.72368	1.36184	77	0.202632	0.101316	89	0.234211	0.117105	41	0.107895	0.0539474	0.9263	0.00243763	0.00121882	255	0.255	0.671053	0.000671053	0.000335526
Condiments
Maltodextrin	1500	3.94737	30 x 50g	5642	14.8474	7.42368	1410	3.71053	1.85526	0.15	0.000394737	0.000197368	0.15	0.000394737	0.000197368	18.2	0.0478947	0.0239474	0	0	0	0	0
Fructose powder, fruisana	1500	3.94737	7 x cup	6000	15.7895	7.89474	1500	3.94737	1.97368	0	0	0	0	0	0	0.48	0.00126316	0.000631579	1339	1.339	3.52368	0.00352368	0.00176184
Colmans English Mustard	50	0.131579	12 ½ x Average Portion	94	0.247368	0.123684	6.7	0.0176316	0.00881579	3.4	0.00894737	0.00447368	6	0.0157895	0.00789474	0.1764	0.000464211	0.000232105	0	0	0	0	0
Mustard, smooth	70	0.184211	17 ½ x Average Portion	98	0.257895	0.128947	6.6	0.0173684	0.00868421	5	0.0131579	0.00657895	5.7	0.015	0.0075	0.2469	0.000649737	0.000324868	0	0	0	0	0
Mustard, wholegrain	100	0.263158	10 x teaspoon	141	0.371053	0.185526	4.2	0.0110526	0.00552632	8.2	0.0215789	0.0107895	10.2	0.0268421	0.0134211	0.18	0.000473684	0.000236842	0	0	0	0	0
Soy sauce, light and dark varieties	1000	2.63158	56 x tablespoon	812	2.13684	1.06842	173	0.455263	0.227632	30	0.0789474	0.0394737	0	0	0	1.5	0.00394737	0.00197368	613	0.613	1.61316	0.00161316	0.000806579
Kikkoman, Teriyaki Sauce	1000	2.63158	67 x tablespoon (serving)	953	2.50789	1.25395	225	0.592105	0.296053	15.6	0.0410526	0.0205263	0.2441	0.000642368	0.000321184	1.5	0.00394737	0.00197368	613	0.613	1.61316	0.00161316	0.000806579
Oyster sauce	500	1.31579	25 x Average Portion	83	0.218421	0.109211	0	0	0	19.5	0.0513158	0.0256579	0.5	0.00131579	0.000657895	0.77	0.00202632	0.00101316	307	0.307	0.807895	0.000807895	0.000403947
Sriracha Chilli Sauce	750	1.97368	38 x tablespoon	713	1.87632	0.938158	169	0.444737	0.222368	7.3	0.0192105	0.00960526	0.9926	0.00261211	0.00130605	1.2	0.00315789	0.00157895	460	0.46	1.21053	0.00121053	0.000605263
Vinegar	10	0.0263158	2 x Average Portion	0.4	0.00105263	0.000526316	0.06	0.000157895	7.89474e-05	0.04	0.000105263	5.26316e-05	0	0	0	0.0112	2.94737e-05	1.47368e-05	0	0	0	0	0
Balsamic Vinegar	50	0.131579	10 x Average Portion	34.6	0.0910526	0.0455263	8.4	0.0221053	0.0110526	0.25	0.000657895	0.000328947	0	0	0	0.0561	0.000147632	7.38158e-05	0	0	0	0	0
Wine vinegar	450	1.18421	39 x tablespoon	9	0.0236842	0.0118421	2.3	0.00605263	0.00302632	0	0	0	0	0	0	0.5048	0.00132842	0.000664211	0	0	0	0	0
Brown sauce	800	2.10526	33 x tablespoon	914	2.40526	1.20263	217	0.571053	0.285526	9.6	0.0252632	0.0126316	0.8	0.00210526	0.00105263	1.2	0.00315789	0.00157895	490	0.49	1.28947	0.00128947	0.000644737
Knorr Gravy Mix	200	0.526316	20 x heaped teaspoon	678	1.78421	0.892105	99	0.260526	0.130263	33.2	0.0873684	0.0436842	16.6	0.0436842	0.0218421	0.36	0.000947368	0.000473684	0	0	0	0	0
Cornish Sea Salt Co Four Pepper & Cornish Sea Salt 60g	50	0.131579	0.83 x Per pack	65	0.171053	0.0855263	12	0.0315789	0.0157895	2.3	0.00605263	0.00302632	0.9	0.00236842	0.00118421	0.2418	0.000636316	0.000318158	0	0	0	0	0
Maldon Sea Salt	150	0.394737	19 x heaped teaspoon	0	0	0	0	0	0	0	0	0	0	0	0	0.0969	0.000255	0.0001275	0	0	0	0	0
Salt	1000	2.63158	125 x heaped teaspoon	0	0	0	0	0	0	0	0	0	0	0	0	0.646	0.0017	0.00085	0	0	0	0	0
Hellmanns, Light Mayonnaise	1000	2.63158	30 x heaped tablespoon	2812	7.4	3.7	65	0.171053	0.0855263	14	0.0368421	0.0184211	275	0.723684	0.361842	2	0.00526316	0.00263158	0	0	0	0	0
Mayonnaise, standard, retail	500	1.31579	15 x heaped tablespoon	3434	9.03684	4.51842	11.6	0.0305263	0.0152632	5.5	0.0144737	0.00723684	374	0.984211	0.492105	1	0.00263158	0.00131579	0	0	0	0	0
Tomato ketchup	600	1.57895	25 x tablespoon	711	1.87105	0.935526	167	0.439474	0.219737	9.6	0.0252632	0.0126316	0.6	0.00157895	0.000789474	0.876	0.00230526	0.00115263	320	0.32	0.842105	0.000842105	0.000421053
Sweet chilli sauce	1000	2.63158	50 x tablespoon	2450	6.44737	3.22368	575	1.51316	0.756579	15	0.0394737	0.0197368	10	0.0263158	0.0131579	0.7735	0.00203553	0.00101776	613	0.613	1.61316	0.00161316	0.000806579
Vanilla essence, no alcohol	20	0.0526316	4 x teaspoon	0.024	6.31579e-05	3.15789e-05	0	0	0	0.006	1.57895e-05	7.89474e-06	0	0	0	0.086	0.000226316	0.000113158	2530	2.53	6.65789	0.00665789	0.00332895
Lotus Biscoff Spread 400g	100	0.263158	¼ x Per pack	583	1.53421	0.767105	57	0.15	0.075	2.9	0.00763158	0.00381579	38.1	0.100263	0.0501316	0.032	8.42105e-05	4.21053e-05	89	0.089	0.234211	0.000234211	0.000117105
			Meal Totals	26227	69.0184	34.5092	4709	12.3921	6.19605	181	0.476316	0.238158	740	1.94737	0.973684	32.3	0.085	0.0425	7374	7.374	19.4053	0.0194053	0.00970263
Confectionary
Chocolate, white	50	0.131579	1 x regular milky bar	266	0.7	0.35	27.8	0.0731579	0.0365789	4	0.0105263	0.00526316	15.5	0.0407895	0.0203947	0.33	0.000868421	0.000434211	860	0.86	2.26316	0.00226316	0.00113158
Chocolate, milk	100	0.263158	2 ½ x standard bar	522	1.37368	0.686842	53	0.139474	0.0697368	7.3	0.0192105	0.00960526	31.1	0.0818421	0.0409211	0.36	0.000947368	0.000473684	0	0	0	0	0
			Meal Totals	789	2.07632	1.03816	81	0.213158	0.106579	11.3	0.0297368	0.0148684	47	0.123684	0.0618421	0.69	0.00181579	0.000907895	860	0.86	2.26316	0.00226316	0.00113158
Beverages
Tetley Mint Fusion Tea Bags x25	22.5	0.0592105		0.63	0.00165789	0.000828947	0.135	0.000355263	0.000177632	0.0225	5.92105e-05	2.96053e-05	0	0	0	0	0	0	0	0	0	0	0
Tetley Camomile Tea Bags x25	22.5	0.0592105	0.6 x Per pack	0.63	0.00165789	0.000828947	0.135	0.000355263	0.000177632	0.0225	5.92105e-05	2.96053e-05	0	0	0	0.0074	1.94737e-05	9.73684e-06	199	0.199	0.523684	0.000523684	0.000261842
Tea, green, infusion	210	0.552632	17 x tablespoon	0.84	0.00221053	0.00110526	0	0	0	0.21	0.000552632	0.000276316	0	0	0	0.0693	0.000182368	9.11842e-05	1860	1.86	4.89474	0.00489474	0.00244737
Barry's Tea Original Blend 80 Tea Bags 250g	937.5	2.46711	3 ¾ x Per pack	0	0	0	0	0	0	0	0	0	0	0	0	0.3094	0.000814211	0.000407105	8303	8.303	21.85	0.02185	0.010925
Energy drink, Red Bull	500	1.31579	2 x standard can	226	0.594737	0.297368	57	0.15	0.075	0	0	0	0	0	0	0.2552	0.000671579	0.000335789	0	0	0	0	0
San Pellegrino Blood Orange 330ml	6600	17.3684	20 x Per pack	1320	3.47368	1.73684	323	0.85	0.425	6.6	0.0173684	0.00868421	0	0	0	3	0.00789474	0.00394737	6725	6.725	17.6974	0.0176974	0.00884868
Barr Lemonade 750ml Glass Bottle	6880	18.1053	9 x Per pack	908	2.38947	1.19474	193	0.507895	0.253947	34.4	0.0905263	0.0452632	0	0	0	2.8	0.00736842	0.00368421	0	0	0	0	0
Appletiser 24 x 250ml	3750	9.86842	15 x Per 250ml	1650	4.34211	2.17105	413	1.08684	0.543421	0	0	0	0	0	0	3.8	0.01	0.005	4277	4.277	11.2553	0.0112553	0.00562763
J20 Apple and Mango Juice	16500	43.4211	50 x Glass bottle	4092	10.7684	5.38421	1023	2.69211	1.34605	0	0	0	0	0	0	49	0.128947	0.0644737	4406	4.406	11.5947	0.0115947	0.00579737
Pineapple juice, fresh	5000	13.1579	50 x 100ml	1462	3.84737	1.92368	340	0.894737	0.447368	3	0.00789474	0.00394737	10	0.0263158	0.0131579	13.9	0.0365789	0.0182895	6365	6.365	16.75	0.01675	0.008375
Water, bottled, average	1000000	2631.58	1000 x Litre bottle	0	0	0	0	0	0	0	0	0	0	0	0	490	1.28947	0.644737	1000	1	2.63158	0.00263158	0.00131579
MOJU Cold Pressed Turmeric Booster Shot 60ml	36000	94.7368	600 x Per pack	20160	53.0526	26.5263	3132	8.24211	4.12105	612	1.61053	0.805263	576	1.51579	0.757895	36	0.0947368	0.0473684	0	0	0	0	0
Orange juice, from concentrate	8000	21.0526	27 x Tall tumbler	2960	7.78947	3.89474	702	1.84737	0.923684	46	0.121053	0.0605263	8	0.0210526	0.0105263	3.7	0.00973684	0.00486842	8152	8.152	21.4526	0.0214526	0.0107263
			Meal Totals	32780	86.2632	43.1316	6183	16.2711	8.13553	703	1.85	0.925	594	1.56316	0.781579	603	1.58684	0.793421	41286	41.286	108.647	0.108647	0.0543237
	1.92775e+06	5073.01	Plan Total:	863256	2271.73	1135.86	86805	228.434	114.217	52383	137.85	68.925	34066	89.6474	44.8237	2725	7.17105	3.58553	2283570	2283.57	6009.39	6.00939	3.0047
			STDEV	10318.7	27.1545	13.5773	1101.56	2.89885	1.44942	1017.37	2.6773	1.33865	664.615	1.74899	0.874494	53.8688	0.14176	0.07088	40141.4	40.1414	105.635	0.105635	0.0528177
			CONFIDENCE NORM	1629.72	4.28874	2.14437	173.979	0.457839	0.22892	160.682	0.422848	0.211424	104.968	0.276232	0.138116	8.50796	0.0223894	0.0111947	6339.87	6.33987	16.6839	0.0166839	0.00834194
			CONFIDENCE LOWER	861626	2267.44	1133.72	86631	227.976	113.988	52222.3	137.427	68.7136	33961	89.3711	44.6856	2716.49	7.14866	3.57433	2.27723e+06	2277.23	5992.71	5.99271	2.99636
			CONFIDENCE UPPER	864886	2276.02	1138.01	86979	228.892	114.446	52543.7	138.273	69.1364	34171	89.9236	44.9618	2733.51	7.19344	3.59672	2.28991e+06	2289.91	6026.08	6.02608	3.01304

## Sheet: TEAM FOUR
Food Name	Quantity (g)	Quantity Per Person (g)	Measure	Energy (kcal)	Energy Per Person per Day (Kcals)	Energy Per Person per Service (Kcals)	Carbohydrate (g)	Carbohydrate Per Person Per Day (g)	Carbohydrate Per Person Per Service (g)	Protein (g)	Protein Per Person Per Day (g)	Protein Per Person Per Service (g)	Fat (g)	Fat Per Person Per Day (g)	Fat Per Person Per Service (g)	Foodprint CO2 (kg.CO2.eq)	Foodprint CO2 Per Person Per Day (kg.CO2.eq)	Foodprint CO2 Per Person Per Service (kg.CO2.eq)	Foodprint Water (L)	Foodprint Water (kL.eq)	Foodprint Water Per Person Per Day (L)	Foodprint Water Per Person Per Day (kL.eq)	Foodprint Water Per Person Per Service (kL.eq)
Beef (Beef Herd)
Beef, lean, average, raw	5000	6.94444	21 x Large	6435	13.4062	6.70312	0	0	0	1125	2.34375	1.17188	215	0.447917	0.223958	133	0.277083	0.138542	132325	132.325	275.677	0.275677	0.137839
Beef, mince, raw, extra lean	3000	4.16667	12 ½ x Extra large	3762	7.8375	3.91875	0	0	0	657	1.36875	0.684375	126	0.2625	0.13125	63	0.13125	0.065625	79395	79.395	165.406	0.165406	0.0827031
Beef, sirloin steak, raw, lean	2500	3.47222	16 x Medium	3363	7.00625	3.50312	0	0	0	588	1.225	0.6125	113	0.235417	0.117708	53	0.110417	0.0552083	66163	66.163	137.84	0.13784	0.0689198
	10500		Meal Totals	13560	28.25	14.125	0	0	0	2370	4.9375	2.46875	454	0.945833	0.472917	249	0.51875	0.259375	277883	277.883	578.923	0.578923	0.289461
Lamb & Mutton
			Meal Totals	0	0	0	0	0	0	0	0	0	0	0	0	0	0	0	0	0	0	0	0
Beef (Dairy Herd)
			Meal Totals	0	0	0	0	0	0	0	0	0	0	0	0	0	0	0	0	0	0	0	0
Crustaceans (Farmed)
			Meal Totals	0	0	0	0	0	0	0	0	0	0	0	0	0	0	0	0	0	0	0	0
Cheese
Cheese, Parmesan, fresh	2000	2.77778	133 x tablespoon	8311	17.3146	8.65729	17.2	0.0358333	0.0179167	724	1.50833	0.754167	594	1.2375	0.61875	30.7	0.0639583	0.0319792	20400	20.4	42.5	0.0425	0.02125
Cheese, Cheddar, English	2000	2.77778	50 x Average Portion	8322	17.3375	8.66875	2	0.00416667	0.00208333	508	1.05833	0.529167	698	1.45417	0.727083	17.7	0.036875	0.0184375	10120	10.12	21.0833	0.0210833	0.0105417
Cheese, Feta	200	0.277778	7 x Average Portion	500	1.04167	0.520833	2.9	0.00604167	0.00302083	31.2	0.065	0.0325	40	0.0833333	0.0416667	1.6	0.00333333	0.00166667	1882	1.882	3.92083	0.00392083	0.00196042
Cheese, Halloumi	675	0.9375	4 ¾ x x	2117	4.41042	2.20521	11	0.0229167	0.0114583	161	0.335417	0.167708	159	0.33125	0.165625	10.1	0.0210417	0.0105208	6352	6.352	13.2333	0.0132333	0.00661667
			Meal Totals	19250	40.1042	20.0521	33.1	0.0689583	0.0344792	1425	2.96875	1.48438	1491	3.10625	1.55313	60	0.125	0.0625	38754	38.754	80.7375	0.0807375	0.0403688
Pig Meat
Ham	300	0.416667	15 x Average slice	322	0.670833	0.335417	3	0.00625	0.003125	55	0.114583	0.0572917	9.9	0.020625	0.0103125	1.5	0.003125	0.0015625	1835	1.835	3.82292	0.00382292	0.00191146
			Meal Totals	322	0.670833	0.335417	3	0.00625	0.003125	55	0.114583	0.0572917	9.9	0.020625	0.0103125	1.5	0.003125	0.0015625	1835	1.835	3.82292	0.00382292	0.00191146
Fish (Farmed)
Broth, fish, homemade	100	0.138889	0.4 x 1 cup	15	0.03125	0.015625	0.4	0.000833333	0.000416667	2	0.00416667	0.00208333	0.6	0.00125	0.000625	0.6903	0.00143812	0.000719062	0	0	0	0	0
Tuna, canned in brine, drained	1000	1.38889	14 x Small can (100g) drained	1086	2.2625	1.13125	0	0	0	249	0.51875	0.259375	10	0.0208333	0.0104167	2.1	0.004375	0.0021875	0	0	0	0	0
Salmon, farmed, flesh only, raw	2000	2.77778	11 x large fillet	4332	9.025	4.5125	0	0	0	408	0.85	0.425	300	0.625	0.3125	6.9	0.014375	0.0071875	4386	4.386	9.1375	0.0091375	0.00456875
Salmon, smoked (cold-smoked)	600	0.833333	10 ¾ x average portion	1105	2.30208	1.15104	3	0.00625	0.003125	137	0.285417	0.142708	61	0.127083	0.0635417	2.1	0.004375	0.0021875	1316	1.316	2.74167	0.00274167	0.00137083
Cod, flesh only, raw	1000	1.38889	20 x Small	754	1.57083	0.785417	0	0	0	175	0.364583	0.182292	6	0.0125	0.00625	2.1	0.004375	0.0021875	2782	2.782	5.79583	0.00579583	0.00289792
Sea Bass or bream, raw	1000	1.38889	6 x fillet	917	1.91042	0.955208	0	0	0	184	0.383333	0.191667	20	0.0416667	0.0208333	3.3	0.006875	0.0034375	6524	6.524	13.5917	0.0135917	0.00679583
			Meal Totals	8209	17.1021	8.55104	3.4	0.00708333	0.00354167	1155	2.40625	1.20312	397	0.827083	0.413542	17.2	0.0358333	0.0179167	15008	15.008	31.2667	0.0312667	0.0156333
Poultry Meat
Bone broth or stock, chicken, homemade, bones removed	200	0.277778	0.8 x 1 cup	32.7	0.068125	0.0340625	0	0	0	4.5	0.009375	0.0046875	1.6	0.00333333	0.00166667	0.0042	8.75e-06	4.375e-06	0	0	0	0	0
Chicken, light meat, raw	18000	25	103 x cup, diced	19062	39.7125	19.8562	0	0	0	4320	9	4.5	198	0.4125	0.20625	47	0.0979167	0.0489583	59944	59.944	124.883	0.124883	0.0624417
Chicken, wing quarter, raw, meat and skin, weighed with bone	5000	6.94444	34 x Average wing quarter	6370	13.2708	6.63542	0	0	0	670	1.39583	0.697917	410	0.854167	0.427083	13	0.0270833	0.0135417	16651	16.651	34.6896	0.0346896	0.0173448
Turkey, light meat, raw	3000	4.16667	17 x average serve breast	3144	6.55	3.275	0	0	0	732	1.525	0.7625	24	0.05	0.025	12.2	0.0254167	0.0127083	12975	12.975	27.0312	0.0270312	0.0135156
			Meal Totals	28609	59.6021	29.801	0	0	0	5727	11.9313	5.96563	634	1.32083	0.660417	72	0.15	0.075	89570	89.57	186.604	0.186604	0.0933021
Eggs
Eggs, chicken, white, raw	5000	6.94444	21 x cup	2160	4.5	2.25	0	0	0	540	1.125	0.5625	0	0	0	17.3	0.0360417	0.0180208	18160	18.16	37.8333	0.0378333	0.0189167
Eggs, chicken, yolk, raw	3000	4.16667	1 x 446.03 Average yolk	10419	21.7063	10.8531	0	0	0	492	1.025	0.5125	939	1.95625	0.978125	10.4	0.0216667	0.0108333	10896	10.896	22.7	0.0227	0.01135
Eggs, chicken, whole, raw	20520	28.5	306 x Jumbo, Size 1	26963	56.1729	28.0865	0	0	0	2586	5.3875	2.69375	1847	3.84792	1.92396	71	0.147917	0.0739583	74529	74.529	155.269	0.155269	0.0776344
			Meal Totals	39542	82.3792	41.1896	0	0	0	3618	7.5375	3.76875	2786	5.80417	2.90208	99	0.20625	0.103125	103585	103.585	215.802	0.215802	0.107901
Tofu
Tofu, raw, regular	450	0.625	3 x 1/2 cup	375	0.78125	0.390625	9	0.01875	0.009375	36.4	0.0758333	0.0379167	21.5	0.0447917	0.0223958	1	0.00208333	0.00104167	1135	1.135	2.36458	0.00236458	0.00118229
			Meal Totals	375	0.78125	0.390625	9	0.01875	0.009375	36.4	0.0758333	0.0379167	21.5	0.0447917	0.0223958	1	0.00208333	0.00104167	1135	1.135	2.36458	0.00236458	0.00118229
Groundnuts
Peanut butter, smooth	800	1.11111	32 x Thick spread on slice	4850	10.1042	5.05208	98	0.204167	0.102083	182	0.379167	0.189583	414	0.8625	0.43125	0.664	0.00138333	0.000691667	2702	2.702	5.62917	0.00562917	0.00281458
			Meal Totals	4850	10.1042	5.05208	98	0.204167	0.102083	182	0.379167	0.189583	414	0.8625	0.43125	0.664	0.00138333	0.000691667	2702	2.702	5.62917	0.00562917	0.00281458
Other Pulses
Baked beans, canned in tomato sauce	3000	4.16667	7 x large can	2404	5.00833	2.50417	417	0.86875	0.434375	150	0.3125	0.15625	15	0.03125	0.015625	4.4	0.00916667	0.00458333	2403	2.403	5.00625	0.00500625	0.00250312
			Meal Totals	2404	5.00833	2.50417	417	0.86875	0.434375	150	0.3125	0.15625	15	0.03125	0.015625	4.4	0.00916667	0.00458333	2403	2.403	5.00625	0.00500625	0.00250312
Peas
Peas, frozen, raw	2000	2.77778	25 x NHS serving = 3 tablespoons	1356	2.825	1.4125	201	0.41875	0.209375	106	0.220833	0.110417	14	0.0291667	0.0145833	5.1	0.010625	0.0053125	3958	3.958	8.24583	0.00824583	0.00412292
Peas, sugar-snap, raw	2000	2.77778	20 x NHS serving = handful (14 beans)	695	1.44792	0.723958	97	0.202083	0.101042	68	0.141667	0.0708333	4	0.00833333	0.00416667	5.1	0.010625	0.0053125	3958	3.958	8.24583	0.00824583	0.00412292
			Meal Totals	2051	4.27292	2.13646	298	0.620833	0.310417	174	0.3625	0.18125	18	0.0375	0.01875	10.2	0.02125	0.010625	7916	7.916	16.4917	0.0164917	0.00824583
Nuts
			Meal Totals		0	0	0	0	0	0	0	0	0	0	0	0	0	0	0	0	0	0	0
Other Grains
Flour mix, gluten free	2000	2.77778	22 x cup	7178	14.9542	7.47708	1692	3.525	1.7625	80	0.166667	0.0833333	10	0.0208333	0.0104167	2.4	0.005	0.0025	3698	3.698	7.70417	0.00770417	0.00385208
Flour, wheat, wholemeal	3000	4.16667	21 x cup	9568	19.9333	9.96667	1909	3.97708	1.98854	348	0.725	0.3625	60	0.125	0.0625	3.5	0.00729167	0.00364583	5547	5.547	11.5563	0.0115563	0.00577813
Pasta, white, dried, raw	5000	6.94444	53 x cup	16760	34.9167	17.4583	3445	7.17708	3.58854	565	1.17708	0.588542	80	0.166667	0.0833333	5.1	0.010625	0.0053125	6640	6.64	13.8333	0.0138333	0.00691667
Pasta, wholewheat, spaghetti, dried, raw	2000	2.77778	18 x Large portion	6452	13.4417	6.72083	1248	2.6	1.3	252	0.525	0.2625	50	0.104167	0.0520833	2	0.00416667	0.00208333	2656	2.656	5.53333	0.00553333	0.00276667
			Meal Totals	39957	83.2438	41.6219	8294	17.2792	8.63958	1245	2.59375	1.29688	200	0.416667	0.208333	13	0.0270833	0.0135417	18541	18.541	38.6271	0.0386271	0.0193135
Milk
Butter, unsalted	1000	1.38889	5 x cup, cubed	7445	15.5104	7.75521	5.7	0.011875	0.0059375	6	0.0125	0.00625	822	1.7125	0.85625	9	0.01875	0.009375	5553	5.553	11.5687	0.0115687	0.00578437
Milk, semi-skimmed, pasteurised, average	41200	57.2222	165 x cup / serving	19455	40.5312	20.2656	1846	3.84583	1.92292	1442	3.00417	1.50208	700	1.45833	0.729167	63	0.13125	0.065625	65879	65.879	137.248	0.137248	0.068624
Yogurt, Greek, plain, whole	10000	13.8889	67 x Larger pot	11740	24.4583	12.2292	380	0.791667	0.395833	980	2.04167	1.02083	700	1.45833	0.729167	20	0.0416667	0.0208333	16590	16.59	34.5625	0.0345625	0.0172813
			Meal Totals	38639	80.4979	40.249	2231	4.64792	2.32396	2428	5.05833	2.52917	2222	4.62917	2.31458	92	0.191667	0.0958333	88022	88.022	183.379	0.183379	0.0916896
Soymilk
Milk, soya, non-dairy alternative to milk, unsweetened, fortified	297	0.4125	10 x In tea/coffee	77	0.160417	0.0802083	1.4	0.00291667	0.00145833	7.1	0.0147917	0.00739583	4.8	0.01	0.005	0.2614	0.000544583	0.000272292	1118	1.118	2.32917	0.00232917	0.00116458
			Meal Totals	77	0.160417	0.0802083	1.4	0.00291667	0.00145833	7.1	0.0147917	0.00739583	4.8	0.01	0.005	0.2614	0.000544583	0.000272292	1118	1.118	2.32917	0.00232917	0.00116458
Other Milks
Almond Milk, unsweetened	300	0.416667	10 x In tea/coffee	123	0.25625	0.128125	1.5	0.003125	0.0015625	4.4	0.00916667	0.00458333	11	0.0229167	0.0114583	0.297	0.00061875	0.000309375	1129	1.129	2.35208	0.00235208	0.00117604
Alpro Coconut Original	309	0.429167	2 x On cereal (30-35g portion)	58	0.120833	0.0604167	8	0.0166667	0.00833333	0.309	0.00064375	0.000321875	2.8	0.00583333	0.00291667	0.1267	0.000263958	0.000131979	1163	1.163	2.42292	0.00242292	0.00121146
Oat Milk, unsweetened, with calcium	297	0.4125	10 x In tea/coffee	127	0.264583	0.132292	18.7	0.0389583	0.0194792	3	0.00625	0.003125	4.5	0.009375	0.0046875	0.294	0.0006125	0.00030625	1118	1.118	2.32917	0.00232917	0.00116458
			Meal Totals	308	0.641667	0.320833	28.2	0.05875	0.029375	7.7	0.0160417	0.00802083	18.3	0.038125	0.0190625	0.7177	0.00149521	0.000747604	3409	3.409	7.10208	0.00710208	0.00355104
Cassava
			Meal Totals	0	0	0	0	0	0	0	0	0	0	0	0	0	0	0	0	0	0	0	0
Rice (Flooded)
Rice, wild, raw	3000	4.16667	19 x cup	10031	20.8979	10.449	2068	4.30833	2.15417	366	0.7625	0.38125	33	0.06875	0.034375	7.7	0.0160417	0.00802083	7491	7.491	15.6062	0.0156062	0.00780312
Rice, brown, wholegrain, raw	3000	4.16667	15 x cup	9733	20.2771	10.1385	2101	4.37708	2.18854	231	0.48125	0.240625	45	0.09375	0.046875	7.7	0.0160417	0.00802083	7491	7.491	15.6062	0.0156062	0.00780312
Brown rice, basmati, dry	3000	4.16667	15 x cup	9992	20.8167	10.4083	2268	4.725	2.3625	204	0.425	0.2125	11.7	0.024375	0.0121875	7.7	0.0160417	0.00802083	7491	7.491	15.6062	0.0156062	0.00780312
			Meal Totals	29756	61.9917	30.9958	6437	13.4104	6.70521	801	1.66875	0.834375	90	0.1875	0.09375	23	0.0479167	0.0239583	22473	22.473	46.8188	0.0468187	0.0234094
Oatmeal
Porridge oats, unfortified	4000	5.55556	50 x cup	14946	31.1375	15.5687	2572	5.35833	2.67917	436	0.908333	0.454167	324	0.675	0.3375	1.5	0.003125	0.0015625	9664	9.664	20.1333	0.0201333	0.0100667
			Meal Totals	14946	31.1375	15.5687	2572	5.35833	2.67917	436	0.908333	0.454167	324	0.675	0.3375	1.5	0.003125	0.0015625	9664	9.664	20.1333	0.0201333	0.0100667
Potatoes
Sweet potato, raw, flesh only	5000	6.94444	11 x large	4309	8.97708	4.48854	984	2.05	1.025	60	0.125	0.0625	15	0.03125	0.015625	2.5	0.00520833	0.00260417	1915	1.915	3.98958	0.00398958	0.00199479
Potatoes, old, raw, flesh only	10000	13.8889	27 x large whit/red 9-12cm diameter	8010	16.6875	8.34375	1790	3.72917	1.86458	190	0.395833	0.197917	10	0.0208333	0.0104167	6	0.0125	0.00625	111909	111.909	233.144	0.233144	0.116572
Potatoes, new and salad, flesh only, raw	5000	6.94444	119 x average	3329	6.93542	3.46771	736	1.53333	0.766667	85	0.177083	0.0885417	5	0.0104167	0.00520833	3	0.00625	0.003125	55955	55.955	116.573	0.116573	0.0582865
			Meal Totals	15648	32.6	16.3	3510	7.3125	3.65625	335	0.697917	0.348958	30	0.0625	0.03125	11.5	0.0239583	0.0119792	169779	169.779	353.706	0.353706	0.176853
Wheat & Rye (Bread)
Bread, white, average	8000	11.1111	133 x Average Portion	18581	38.7104	19.3552	3571	7.43958	3.71979	696	1.45	0.725	168	0.35	0.175	7.5	0.015625	0.0078125	8248	8.248	17.1833	0.0171833	0.00859167
Bread, brown, average	5600	7.77778	86 x Average Portion	11420	23.7917	11.8958	2160	4.5	2.25	442	0.920833	0.460417	112	0.233333	0.116667	5.2	0.0108333	0.00541667	5774	5.774	12.0292	0.0120292	0.00601458
			Meal Totals	30000	62.5	31.25	5732	11.9417	5.97083	1138	2.37083	1.18542	280	0.583333	0.291667	12.7	0.0264583	0.0132292	14022	14.022	29.2125	0.0292125	0.0146062
Maize (Meal)
			Meal Totals		0	0		0	0		0	0		0	0		0	0		0	0	0	0
Palm Oil
			Meal Totals		0	0		0	0		0	0		0	0		0	0		0	0	0	0
Soybean Oil
			Meal Totals		0	0		0	0		0	0		0	0		0	0		0	0	0	0
Olive Oil
Oil, olive	10000	13.8889	43 x cup	89910	187.312	93.6562	0	0	0	0	0	0	9990	20.8125	10.4062	32.7	0.068125	0.0340625	144155	144.155	300.323	0.300323	0.150161
			Meal Totals	89910	187.312	93.6562	0	0	0	0	0	0	9990	20.8125	10.4062	32.7	0.068125	0.0340625	144155	144.155	300.323	0.300323	0.150161
Rapeseed Oil
			Meal Totals		0	0	0	0	0	0	0	0	0	0	0	0	0	0	0	0	0	0	0
Sunflower Oil
			Meal Totals		0	0	0	0	0	0	0	0	0	0	0	0	0	0	0	0	0	0	0
Tomatoes
Plum Tomatoes	1000	1.38889	12 x small	136	0.283333	0.141667	29	0.0604167	0.0302083	5	0.0104167	0.00520833	0	0	0	0.154	0.000320833	0.000160417	713	0.713	1.48542	0.00148542	0.000742708
Tomatoes, cherry, raw	1000	1.38889	7 x cup	233	0.485417	0.242708	36	0.075	0.0375	11	0.0229167	0.0114583	5	0.0104167	0.00520833	0.96	0.002	0.001	214	0.214	0.445833	0.000445833	0.000222917
Tomatoes, canned, whole contents	3000	4.16667	45 x can	615	1.28125	0.640625	114	0.2375	0.11875	33	0.06875	0.034375	3	0.00625	0.003125	0.462	0.0009625	0.00048125	2139	2.139	4.45625	0.00445625	0.00222813
			Meal Totals	984	2.05	1.025	179	0.372917	0.186458	49	0.102083	0.0510417	8	0.0166667	0.00833333	1.6	0.00333333	0.00166667	3066	3.066	6.3875	0.0063875	0.00319375
Brassicas
Cauliflower, raw	4000	5.55556	35 x cup	1224	2.55	1.275	170	0.354167	0.177083	100	0.208333	0.104167	16	0.0333333	0.0166667	1.2	0.0025	0.00125	1140	1.14	2.375	0.002375	0.0011875
Broccoli, green, raw	5000	6.94444	53 x cup, chopped	1746	3.6375	1.81875	154	0.320833	0.160417	215	0.447917	0.223958	30	0.0625	0.03125	3	0.00625	0.003125	1625	1.625	3.38542	0.00338542	0.00169271
Broccolini	3000	4.16667	32 x cup, chopped	1050	2.1875	1.09375	93	0.19375	0.096875	129	0.26875	0.134375	18	0.0375	0.01875	1.8	0.00375	0.001875	975	0.975	2.03125	0.00203125	0.00101563
Curly kale, raw	1000	1.38889	56 x cup, 1 inch pieces, loosely packed	336	0.7	0.35	13.9	0.0289583	0.0144792	34	0.0708333	0.0354167	16	0.0333333	0.0166667	1.5	0.003125	0.0015625	0	0	0	0	0
Waitrose Cavolo Nero	1000	1.38889	5 x Per pack	336	0.7	0.35	14	0.0291667	0.0145833	34	0.0708333	0.0354167	16	0.0333333	0.0166667	0.68	0.00141667	0.000708333	339	0.339	0.70625	0.00070625	0.000353125
			Meal Totals	4692	9.775	4.8875	445	0.927083	0.463542	512	1.06667	0.533333	96	0.2	0.1	8.2	0.0170833	0.00854167	4079	4.079	8.49792	0.00849792	0.00424896
Onions & Leeks
Onions, raw	3000	4.16667	20 x medium	1076	2.24167	1.12083	232	0.483333	0.241667	30	0.0625	0.03125	3	0.00625	0.003125	2.3	0.00479167	0.00239583	871	0.871	1.81458	0.00181458	0.000907292
Onions, red, raw	3000	4.16667	16 x large onion	1046	2.17917	1.08958	222	0.4625	0.23125	30	0.0625	0.03125	4.2	0.00875	0.004375	2.3	0.00479167	0.00239583	871	0.871	1.81458	0.00181458	0.000907292
Leeks, raw	1000	1.38889	11 x leek	240	0.5	0.25	41	0.0854167	0.0427083	15	0.03125	0.015625	2	0.00416667	0.00208333	0.71	0.00147917	0.000739583	339	0.339	0.70625	0.00070625	0.000353125
			Meal Totals	2362	4.92083	2.46042	495	1.03125	0.515625	75	0.15625	0.078125	9.2	0.0191667	0.00958333	5.3	0.0110417	0.00552083	2081	2.081	4.33542	0.00433542	0.00216771
Root Vegetables
Ginger, fresh	500	0.694444	100 x thumb (2cm)	222	0.4625	0.23125	37.6	0.0783333	0.0391667	9	0.01875	0.009375	4	0.00833333	0.00416667	0.44	0.000916667	0.000458333	829	0.829	1.72708	0.00172708	0.000863542
Garlic, raw	1000	1.38889	79 x jumbo clove	968	2.01667	1.00833	149	0.310417	0.155208	79	0.164583	0.0822917	6	0.0125	0.00625	0.57	0.0011875	0.00059375	589	0.589	1.22708	0.00122708	0.000613542
Celeriac, raw	2000	2.77778	8 x medium	344	0.716667	0.358333	44	0.0916667	0.0458333	24	0.05	0.025	8	0.0166667	0.00833333	2	0.00416667	0.00208333	0	0	0	0	0
Carrots, old, raw	4000	5.55556	31 x cup, chopped	1397	2.91042	1.45521	293	0.610417	0.305208	20	0.0416667	0.0208333	16	0.0333333	0.0166667	5.1	0.010625	0.0053125	780	0.78	1.625	0.001625	0.0008125
			Meal Totals	2931	6.10625	3.05313	524	1.09167	0.545833	132	0.275	0.1375	34	0.0708333	0.0354167	8.1	0.016875	0.0084375	2198	2.198	4.57917	0.00457917	0.00228958
Other Vegetables
Vegetable stock, homemade	200	0.277778	0.8 x 1 cup	17.2	0.0358333	0.0179167	3.5	0.00729167	0.00364583	0.5735	0.00119479	0.000597396	0.1517	0.000316042	0.000158021	0.36	0.00075	0.000375	0	0	0	0	0
Spinach, baby, raw	2000	2.77778	25 x NHS Serving (1 cereal bowl)	331	0.689583	0.344792	3.8	0.00791667	0.00395833	52	0.108333	0.0541667	12	0.025	0.0125	0.68	0.00141667	0.000708333	584	0.584	1.21667	0.00121667	0.000608333
Peppers, bell, raw, mixed	3000	4.16667	25 x Average Portion	777	1.61875	0.809375	144	0.3	0.15	30	0.0625	0.03125	9	0.01875	0.009375	2	0.00416667	0.00208333	22095	22.095	46.0312	0.0460313	0.0230156
Lettuce, average, raw	120	0.166667	1 ½ x NHS serving (1 cereal bowl)	13.6	0.0283333	0.0141667	1.7	0.00354167	0.00177083	1.4	0.00291667	0.00145833	0.12	0.00025	0.000125	0.3204	0.0006675	0.00033375	28.4	0.0284	0.0591667	5.91667e-05	2.95833e-05
Lettuce, Iceberg, raw	650	0.902778	8 x NHS serving (1 cereal bowl)	85	0.177083	0.0885417	12.4	0.0258333	0.0129167	4.6	0.00958333	0.00479167	2	0.00416667	0.00208333	1.7	0.00354167	0.00177083	154	0.154	0.320833	0.000320833	0.000160417
Fennel, Florence, raw	1000	1.38889	11 ½ x bulb	126	0.2625	0.13125	17.9	0.0372917	0.0186458	9	0.01875	0.009375	2	0.00416667	0.00208333	0.48	0.001	0.0005	0	0	0	0	0
Courgette, raw	3000	4.16667	38 x Medium portion / NHS Serving	485	1.01042	0.505208	69	0.14375	0.071875	39	0.08125	0.040625	6	0.0125	0.00625	5.3	0.0110417	0.00552083	1008	1.008	2.1	0.0021	0.00105
Celery, raw	120	0.166667	2 x full length stick	10.2	0.02125	0.010625	1.7	0.00354167	0.00177083	0.6	0.00125	0.000625	0.12	0.00025	0.000125	0.0216	4.5e-05	2.25e-05	0	0	0	0	0
Squash, butternut, raw	2000	2.77778	14 x cup cubes	708	1.475	0.7375	150	0.3125	0.15625	22	0.0458333	0.0229167	2	0.00416667	0.00208333	0.5	0.00104167	0.000520833	672	0.672	1.4	0.0014	0.0007
Beans, green, raw	3000	4.16667	43 x NHS Serving (4 tablespoons/1/2 cup)	733	1.52708	0.763542	93	0.19375	0.096875	63	0.13125	0.065625	12	0.025	0.0125	1.5	0.003125	0.0015625	1548	1.548	3.225	0.003225	0.0016125
			Meal Totals	3285	6.84375	3.42188	497	1.03542	0.517708	222	0.4625	0.23125	45	0.09375	0.046875	12.9	0.026875	0.0134375	26089	26.089	54.3521	0.0543521	0.027176
Berries
Mixed berries, frozen	1000	1.38889	7 x cup	300	0.625	0.3125	62	0.129167	0.0645833	8.5	0.0177083	0.00885417	2	0.00416667	0.00208333	0.9064	0.00188833	0.000944167	966	0.966	2.0125	0.0020125	0.00100625
Raspberries, raw	2500	3.47222	38 x Half cup	658	1.37083	0.685417	128	0.266667	0.133333	20	0.0416667	0.0208333	7.5	0.015625	0.0078125	2.1	0.004375	0.0021875	1033	1.033	2.15208	0.00215208	0.00107604
Strawberries, raw	1250	1.73611	5 x cup, puree	391	0.814583	0.407292	76	0.158333	0.0791667	7.5	0.015625	0.0078125	6.3	0.013125	0.0065625	2.1	0.004375	0.0021875	434	0.434	0.904167	0.000904167	0.000452083
Blueberries	2500	3.47222	104 x Average Portion	1045	2.17708	1.08854	228	0.475	0.2375	22.5	0.046875	0.0234375	5	0.0104167	0.00520833	2	0.00416667	0.00208333	2113	2.113	4.40208	0.00440208	0.00220104
Blackberries, raw	1250	1.73611	252 x blackberries	358	0.745833	0.372917	70	0.145833	0.0729167	13.8	0.02875	0.014375	2.5	0.00520833	0.00260417	0.525	0.00109375	0.000546875	516	0.516	1.075	0.001075	0.0005375
			Meal Totals	2751	5.73125	2.86563	563	1.17292	0.586458	72	0.15	0.075	23.3	0.0485417	0.0242708	7.6	0.0158333	0.00791667	5061	5.061	10.5437	0.0105437	0.00527187
Bananas
Bananas, flesh only	2500	3.47222	21 x Large	2140	4.45833	2.22917	500	1.04167	0.520833	30	0.0625	0.03125	2.5	0.00520833	0.00260417	2.3	0.00479167	0.00239583	1975	1.975	4.11458	0.00411458	0.00205729
			Meal Totals	2140	4.45833	2.22917	500	1.04167	0.520833	30	0.0625	0.03125	2.5	0.00520833	0.00260417	2.3	0.00479167	0.00239583	1975	1.975	4.11458	0.00411458	0.00205729
Apples
Apples, eating, raw, flesh and skin	4000	5.55556	17 x Large	2111	4.39792	2.19896	459	0.95625	0.478125	24	0.05	0.025	20	0.0416667	0.0208333	1.2	0.0025	0.00125	15338	15.338	31.9542	0.0319542	0.0159771
			Meal Totals	2111	4.39792	2.19896	459	0.95625	0.478125	24	0.05	0.025	20	0.0416667	0.0208333	1.2	0.0025	0.00125	15338	15.338	31.9542	0.0319542	0.0159771
Citrus
Limes, flesh only	1000	1.38889	20 x all sizes fruit	87	0.18125	0.090625	8	0.0166667	0.00833333	7	0.0145833	0.00729167	3	0.00625	0.003125	0.26	0.000541667	0.000270833	642	0.642	1.3375	0.0013375	0.00066875
Lemons, whole, without pips	1000	1.38889	7 x Average lemon	194	0.404167	0.202083	31.8	0.06625	0.033125	10	0.0208333	0.0104167	3	0.00625	0.003125	0.26	0.000541667	0.000270833	642	0.642	1.3375	0.0013375	0.00066875
Oranges, flesh only	3000	4.16667	18 ½ x small/medium fruit	1111	2.31458	1.15729	240	0.5	0.25	24	0.05	0.025	6	0.0125	0.00625	0.99	0.0020625	0.00103125	1962	1.962	4.0875	0.0040875	0.00204375
			Meal Totals	1392	2.9	1.45	280	0.583333	0.291667	41	0.0854167	0.0427083	12	0.025	0.0125	1.5	0.003125	0.0015625	3246	3.246	6.7625	0.0067625	0.00338125
Other Fruits
Pears, raw, flesh and skin	3000	4.16667	17 x large	1364	2.84167	1.42083	325	0.677083	0.338542	9	0.01875	0.009375	3	0.00625	0.003125	2.3	0.00479167	0.00239583	2766	2.766	5.7625	0.0057625	0.00288125
Peaches, raw, flesh and skin	1000	1.38889	9 x Medium	343	0.714583	0.357292	74	0.154167	0.0770833	10	0.0208333	0.0104167	1	0.00208333	0.00104167	0.39	0.0008125	0.00040625	910	0.91	1.89583	0.00189583	0.000947917
Melon, watermelon, flesh only	3000	4.16667	12 x Average slice	974	2.02917	1.01458	208	0.433333	0.216667	15	0.03125	0.015625	9	0.01875	0.009375	4	0.00833333	0.00416667	705	0.705	1.46875	0.00146875	0.000734375
Pineapple, flesh only, raw	5000	6.94444	5 ½ x total fruit (flesh only)	2375	4.94792	2.47396	558	1.1625	0.58125	25	0.0520833	0.0260417	5	0.0104167	0.00520833	6.7	0.0139583	0.00697917	1275	1.275	2.65625	0.00265625	0.00132813
Mangoes, ripe, flesh only, raw	3000	4.16667	13 x fruit (flesh)	1493	3.11042	1.55521	312	0.65	0.325	21	0.04375	0.021875	18	0.0375	0.01875	0.93	0.0019375	0.00096875	5400	5.4	11.25	0.01125	0.005625
Melon, Canteloupe-type, flesh only	3000	4.16667	23 x Average slice	603	1.25625	0.628125	126	0.2625	0.13125	18	0.0375	0.01875	3	0.00625	0.003125	0.75	0.0015625	0.00078125	2898	2.898	6.0375	0.0060375	0.00301875
Grapes, average	4000	5.55556	40 x Small bunch	2760	5.75	2.875	644	1.34167	0.670833	28	0.0583333	0.0291667	8	0.0166667	0.00833333	1.5	0.003125	0.0015625	2432	2.432	5.06667	0.00506667	0.00253333
Kiwi fruit, flesh only, raw	2000	2.77778	33 x medium	912	1.9	0.95	171	0.35625	0.178125	16	0.0333333	0.0166667	18	0.0375	0.01875	0.7523	0.00156729	0.000783646	1028	1.028	2.14167	0.00214167	0.00107083
Cucumber, raw, flesh and skin	1800	2.5	0 x cup slices	256	0.533333	0.266667	21.6	0.045	0.0225	18	0.0375	0.01875	10.8	0.0225	0.01125	0.414	0.0008625	0.00043125	635	0.635	1.32292	0.00132292	0.000661458
Cherries, flesh and skin, raw	1000	1.38889	18 ½ x Average Portion	668	1.39167	0.695833	146	0.304167	0.152083	12	0.025	0.0125	4	0.00833333	0.00416667	0.46	0.000958333	0.000479167	1604	1.604	3.34167	0.00334167	0.00167083
Coconut, desiccated	1000	1.38889	12 x cup	6049	12.6021	6.30104	61	0.127083	0.0635417	56	0.116667	0.0583333	620	1.29167	0.645833	1.8	0.00375	0.001875	2093	2.093	4.36042	0.00436042	0.00218021
Avocado, Hass, flesh only, weighed with skin and stone	2800	3.88889	12 x Cup, Puree	3305	6.88542	3.44271	33.9	0.070625	0.0353125	36.4	0.0758333	0.0379167	336	0.7	0.35	3.8	0.00791667	0.00395833	5547	5.547	11.5563	0.0115563	0.00577813
			Meal Totals	21101	43.9604	21.9802	2680	5.58333	2.79167	264	0.55	0.275	1036	2.15833	1.07917	23.7	0.049375	0.0246875	27293	27.293	56.8604	0.0568604	0.0284302
Cane Sugar
			Meal Totals		0	0	0	0	0	0	0	0	0	0	0	0	0	0	0	0	0	0	0
Beet Sugar
			Meal Totals		0	0	0	0	0	0	0	0	0	0	0	0	0	0	0	0	0	0	0
Beer (5% ABV)
			Meal Totals		0	0	0	0	0	0	0	0	0	0	0	0	0	0	0	0	0	0	0
Wine (12.5% ABV)
			Meal Totals		0	0	0	0	0	0	0	0	0	0	0	0	0	0	0	0	0	0	0
Dark Chocolate
Chocolate, dark, 70-84% Cocoa	100	0.138889	6 x Average Portion	542	1.12917	0.564583	32	0.0666667	0.0333333	9.1	0.0189583	0.00947917	42	0.0875	0.04375	0.271	0.000564583	0.000282292	1720	1.72	3.58333	0.00358333	0.00179167
			Meal Totals	542	1.12917	0.564583	32	0.0666667	0.0333333	9.1	0.0189583	0.00947917	42	0.0875	0.04375	0.271	0.000564583	0.000282292	1720	1.72	3.58333	0.00358333	0.00179167
Coffee
			Meal Totals		0	0		0	0		0	0		0	0		0	0		0	0	0	0
Herbs
Mixed herbs, dried	1000	1.38889	500 x tablespoon	2689	5.60208	2.80104	360	0.75	0.375	121	0.252083	0.126042	85	0.177083	0.0885417	1	0.00208333	0.00104167	0	0	0	0	0
Bay leaf, dried	35	0.0486111	50 x average	105	0.21875	0.109375	17	0.0354167	0.0177083	2.7	0.005625	0.0028125	2.9	0.00604167	0.00302083	0.0335	6.97917e-05	3.48958e-05	0	0	0	0	0
Basil, fresh	50	0.0694444	100 x leaves	20	0.0416667	0.0208333	2.6	0.00541667	0.00270833	1.6	0.00333333	0.00166667	0.4	0.000833333	0.000416667	0.0477	9.9375e-05	4.96875e-05	0	0	0	0	0
Thyme, fresh	15	0.0208333	4 x tbsp	14.2	0.0295833	0.0147917	2.3	0.00479167	0.00239583	0.45	0.0009375	0.00046875	0.375	0.00078125	0.000390625	0.0143	2.97917e-05	1.48958e-05	0	0	0	0	0
Tarragon, fresh	15	0.0208333	4 x tbsp	7.3	0.0152083	0.00760417	0.945	0.00196875	0.000984375	0.51	0.0010625	0.00053125	0.165	0.00034375	0.000171875	0.0143	2.97917e-05	1.48958e-05	0	0	0	0	0
Sage, fresh	15	0.0208333	4 x tbsp	17.9	0.0372917	0.0186458	2.3	0.00479167	0.00239583	0.585	0.00121875	0.000609375	0.69	0.0014375	0.00071875	0.0143	2.97917e-05	1.48958e-05	0	0	0	0	0
Rosemary, fresh	15	0.0208333	9 x tbsp	14.9	0.0310417	0.0155208	2	0.00416667	0.00208333	0.21	0.0004375	0.00021875	0.66	0.001375	0.0006875	0.0143	2.97917e-05	1.48958e-05	0	0	0	0	0
Parsley, fresh	25	0.0347222	25 x sprigs	8.6	0.0179167	0.00895833	0.665	0.00138542	0.000692708	0.75	0.0015625	0.00078125	0.325	0.000677083	0.000338542	0.0238	4.95833e-05	2.47917e-05	0	0	0	0	0
Dill, fresh	15	0.0208333	4 x tbsp	3.8	0.00791667	0.00395833	0.132	0.000275	0.0001375	0.555	0.00115625	0.000578125	0.12	0.00025	0.000125	0.0143	2.97917e-05	1.48958e-05	0	0	0	0	0
Chives, fresh	15	0.0208333	5 x tablespoon	4.1	0.00854167	0.00427083	0.285	0.00059375	0.000296875	0.495	0.00103125	0.000515625	0.105	0.00021875	0.000109375	0.0152	3.16667e-05	1.58333e-05	0	0	0	0	0
			Meal Totals	2885	6.01042	3.00521	388	0.808333	0.404167	129	0.26875	0.134375	91	0.189583	0.0947917	1.2	0.0025	0.00125	0	0	0	0	0
Funghi
Mushrooms, white, raw	2000	2.77778	29 x cup, pieces	140	0.291667	0.145833	6	0.0125	0.00625	20	0.0416667	0.0208333	4	0.00833333	0.00416667	0.54	0.001125	0.0005625	1224	1.224	2.55	0.00255	0.001275
			Meal Totals	140	0.291667	0.145833	6	0.0125	0.00625	20	0.0416667	0.0208333	4	0.00833333	0.00416667	0.54	0.001125	0.0005625	1224	1.224	2.55	0.00255	0.001275
Spices
Pepper, cayenne, ground	100	0.138889	17 x tablespoon	331	0.689583	0.344792	31.7	0.0660417	0.0330208	12	0.025	0.0125	17.3	0.0360417	0.0180208	0.1152	0.00024	0.00012	28.8	0.0288	0.06	6e-05	3e-05
Chilli powder	100	0.138889	12 ½ x tablespoon	211	0.439583	0.219792	7.2	0.015	0.0075	13.5	0.028125	0.0140625	14.3	0.0297917	0.0148958	0.0821	0.000171042	8.55208e-05	227	0.227	0.472917	0.000472917	0.000236458
Cinnamon, ground	200	0.277778	29 x tablespoon	71	0.147917	0.0739583	4.4	0.00916667	0.00458333	8	0.0166667	0.00833333	2.4	0.005	0.0025	0.2028	0.0004225	0.00021125	0	0	0	0	0
Onion Granules	1000	1.38889	741 x ½ of a teaspoon	3620	7.54167	3.77083	750	1.5625	0.78125	101	0.210417	0.105208	11	0.0229167	0.0114583	0.6978	0.00145375	0.000726875	0	0	0	0	0
Paprika	500	0.694444	74 x tablespoon	1068	2.225	1.1125	51	0.10625	0.053125	71	0.147917	0.0739583	65	0.135417	0.0677083	0.5758	0.00119958	0.000599792	0	0	0	0	0
Star Anise	50	0.0694444		182	0.379167	0.189583	18.8	0.0391667	0.0195833	8.8	0.0183333	0.00916667	8	0.0166667	0.00833333	0	0	0	0	0	0	0	0
Garlic powder	1000	1.38889	103 x tablespoon	2421	5.04375	2.52188	391	0.814583	0.407292	187	0.389583	0.194792	12	0.025	0.0125	0.821	0.00171042	0.000855208	2265	2.265	4.71875	0.00471875	0.00235937
Pepper, black	2050	2.84722	297 x tablespoon	1511	3.14792	1.57396	12.3	0.025625	0.0128125	213	0.44375	0.221875	68	0.141667	0.0708333	2.4	0.005	0.0025	590	0.59	1.22917	0.00122917	0.000614583
			Meal Totals	9415	19.6146	9.80729	1267	2.63958	1.31979	614	1.27917	0.639583	197	0.410417	0.205208	4.9	0.0102083	0.00510417	3111	3.111	6.48125	0.00648125	0.00324063
Condiments
Mayonnaise, standard, retail	3000	4.16667	91 x heaped tablespoon	20606	42.9292	21.4646	70	0.145833	0.0729167	33	0.06875	0.034375	2244	4.675	2.3375	6.1	0.0127083	0.00635417	0	0	0	0	0
Tomato ketchup	3000	4.16667	125 x tablespoon	3553	7.40208	3.70104	833	1.73542	0.867708	48	0.1	0.05	3	0.00625	0.003125	4.4	0.00916667	0.00458333	1602	1.602	3.3375	0.0033375	0.00166875
Sweet chilli sauce	2000	2.77778	100 x tablespoon	4900	10.2083	5.10417	1150	2.39583	1.19792	30	0.0625	0.03125	20	0.0416667	0.0208333	1.5	0.003125	0.0015625	1226	1.226	2.55417	0.00255417	0.00127708
Sea Salt	2000	2.77778	250 x heaped teaspoon	0	0	0	0	0	0	0	0	0	0	0	0	1.3	0.00270833	0.00135417	0	0	0	0	0
			Meal Totals	29059	60.5396	30.2698	2053	4.27708	2.13854	111	0.23125	0.115625	2267	4.72292	2.36146	13.3	0.0277083	0.0138542	2828	2.828	5.89167	0.00589167	0.00294583
Beverages
Water, bottled, average	75900	105.417	76 x Litre bottle	0	0	0	0	0	0	0	0	0	0	0	0	37.2	0.0775	0.03875	76	0.076	0.158333	0.000158333	7.91667e-05
			Meal Totals	0	0	0	0	0	0	0	0	0	0	0	0	37.2	0.0775	0.03875	76	0.076	0.158333	0.000158333	7.91667e-05
	410238	569.775	Plan Total:	464203	967.09	483.545	40035	83.4062	41.7031	23594	49.1542	24.5771	23286	48.5125	24.2563	832	1.73333	0.866667	1111355	1111.36	2315.32	2.31532	1.15766
			STDEV	9433.88	19.6539	9.82695	699.305	1.45689	0.728443	507.134	1.05653	0.528265	958.135	1.99611	0.998057	17.3869	0.0362227	0.0181113	24520.7	24.5207	51.0848	0.0510848	0.0255424
			CONFIDENCE NORM	1709.41	3.56126	1.78063	126.713	0.263986	0.131993	91.8921	0.191442	0.095721	173.613	0.361693	0.180847	3.15048	0.0065635	0.00328175	4443.12	4.44312	9.25651	0.00925651	0.00462825
			CONFIDENCE LOWER	462494	963.528	481.764	39908.3	83.1423	41.5711	23502.1	48.9627	24.4814	23112.4	48.1508	24.0754	828.85	1.72677	0.863385	1.10691e+06	1106.91	2306.07	2.30607	1.15303
			CONFIDENCE UPPER	465912	970.651	485.325	40161.7	83.6702	41.8351	23685.9	49.3456	24.6728	23459.6	48.8742	24.4371	835.15	1.7399	0.869948	1.1158e+06	1115.8	2324.58	2.32458	1.16229
